# Supplementary material
Source: PubMed Central journal article supplement (PMC6545264)
Supplement: NIHMS1525561-supplement-1.pdf [file NIHMS1525561-supplement-1.pdf]

Refid Bibliography

- 1285737 E Kerem, J Reisman, M Corey, GJ Canny, H Levison. Prediction of mortality in patients with cystic fibrosis. *Journal of thoracic transplantation*. 1992. 7:7-11.
- 1306724 JD Cooper, GA Patterson, MS Pohl. Current status of lung transplantation--report of the St. Louis Lung Transplantation Study. *Journal of thoracic transplantation*. 1992. 7:12-15.
- 1345107 A Haverich, SW Hirt, I Wagenberth, I Luhmer, G Ziemer, HC Kallfelz. Thoracic organ transplantation in cystic fibrosis. *Journal of thoracic transplantation*. 1992. 7:16-19.
- 1351559 BP Madden, ME Hodson, V Tsang, R Radley-Smith, A Khaghani, MY Yacoub. Intermediate-term results of lung transplantation in cystic fibrosis. *Journal of thoracic transplantation*. 1992. 7:20-23.
- 1384752 AF Bringuier, C Séébold-Choqueux, Y Moricard, DJ Simmons, G Milhaud, ML Labat. T-lymphocyte-mediated rejection in lung transplantation. *Journal of thoracic transplantation*. 1992. 7:24-27.
- 1389238 P Bonnette, A Bisson, NB el Kadi, A Colchen, M Leroy, M Fischler, P Loirat, I Caubarere. Bilateral sequential lung transplantation in cystic fibrosis. *Journal of thoracic transplantation*. 1992. 7:28-31.
- 1401116 SM Stewart, RA Campbell, D McCallon, DA Waller, WS Andrews. Cognitive patterns in school-age children with cystic fibrosis. *Journal of thoracic transplantation*. 1992. 7:32-35.
- 1465890 J Au, C Scott, A Hasan, I Colquhoun, A Gascoigne, P Corris, C Hilton, J Dark. Bilateral sequential lung transplantation in cystic fibrosis. *Journal of thoracic transplantation*. 1992. 7:36-39.
- 1475546 TM Egan. Lung transplantation in cystic fibrosis.. *Seminars in respiratory infections*. 1992. 7:7-11.
- 1482824 JC Baldwin. Technique of combined heart-lung transplantation.. *Journal of cardiac surgery*. 1992. 7:1-4.
- 1486975 F Héritier, B Madden, ME Hodson, M Yacoub. Lung allograft transplantation: indications, preoperative evaluation, and results. *Journal of thoracic transplantation*. 1992. 7:40-43.
- 1497391 H Shennib, R Adoumie, M Noirclerc. Current status of lung transplantation for cystic fibrosis.. *Journal of thoracic transplantation*. 1992. 7:44-47.
- 1515450 D Metras, B Kreitmann, H Shennib, M Noirclerc. Lung transplantation in children.. *The Journal of thoracic transplantation*. 1992. 7:48-51.
- 1554266 TM Egan, JH Westerman, CJ Lambert, FC Detterbeck, JT Thompson, MR Mill, BA Keagy, LJ Paradowski, VA Starnes, N Lewiston, J Theodore, C Stoehr, E Stinson, NE Shumway, PE Oyer. Cystic fibrosis: results of lung transplantation. *Journal of thoracic transplantation*. 1992. 7:52-55.
- 1610249 H Shennib, M Noirclerc, P Ernst, D Metras, DS Mulder, R Giudicelli, F Lebel, JF Dumon. Double-lung transplantation in cystic fibrosis. *Journal of thoracic transplantation*. 1992. 7:56-59.
- 1718223 JO Warner. Heart-lung transplantation: all the facts.. *Archives of disease in childhood*. 1991. 66:1-4.
- 1735995 JC Ramirez, GA Patterson, TL Winton, AL de Hoyos, JD Miller, JR Maurer. Bilateral lung transplantation in cystic fibrosis. *Journal of thoracic transplantation*. 1992. 7:60-63.
- 1881471 TM Egan, J Westerman, MR Mill, BR Wilcox. Lung transplantation at UNC. The first year.. *North Carolina medical journal*. 1992. 47:1-4.
- 1883192 NE Shumway. The Runme Shaw Memorial Lecture--transplantation of the heart and heart-lung transplantation. *Journal of thoracic transplantation*. 1992. 7:64-67.
- 1884326 N Lewiston, V Starnes, J Theodore. Heart-lung and lung transplantation for cystic fibrosis.. *Clinical transplantation*. 1992. 12:1-4.
- 1895470 EP Trulock, JD Cooper, LR Kaiser, MK Pasque, NA Ettinger, CM Dresler. The Washington University Lung Transplantation Study. *Journal of thoracic transplantation*. 1992. 7:68-71.
- 1898130 LR Kaiser, MK Pasque, EP Trulock, DE Low, CM Dresler, JD Cooper. Bilateral sequential lung transplantation in cystic fibrosis. *Journal of thoracic transplantation*. 1992. 7:72-75.
- 1914549 DM Orenstein, RM Kaplan. Measuring the quality of well-being in cystic fibrosis and lung transplantation. *Journal of thoracic transplantation*. 1992. 7:76-79.
- 1929506 B Whitehead, P Helms, M Goodwin, I Martin, JP Scott, RL Smyth, TW Higenbottam, J Wallwork. Lung transplantation in cystic fibrosis. *Journal of thoracic transplantation*. 1992. 7:80-83.
- 2008101 MR de Leval, R Smyth, B Whitehead, JP Scott, MJ Elliott, L Sharples, N Caine, P Helms, IR Martin, TW Higenbottam, J Wallwork. Lung transplantation in cystic fibrosis. *Journal of thoracic transplantation*. 1992. 7:84-87.
- 2028437 RL Smyth, T Higenbottam, J Scott, J Wallwork. Cystic fibrosis. 5. The current state of lung transplantation. *Journal of thoracic transplantation*. 1992. 7:88-91.
- 2056404 VA Starnes, SE Marshall, NJ Lewiston, J Theodore, EB Stinson, NE Shumway. Heart-lung transplantation in cystic fibrosis. *Journal of thoracic transplantation*. 1992. 7:92-95.
- 2204316 JD Cooper. The evolution of techniques and indications for lung transplantation.. *Annals of surgery*. 1992. 115:1-4.
- 2231084 MH Yacoub, NR Banner, A Khaghani, M Fitzgerald, B Madden, V Tsang, R Radley-Smith, M Hodson. Lung transplantation in cystic fibrosis. *Journal of thoracic transplantation*. 1992. 7:96-99.
- 2277309 JP McGoldrick, JP Scott, R Smyth, T Higenbottam, J Wallwork. Early graft function after heart-lung transplantation. *Journal of thoracic transplantation*. 1992. 7:100-103.
- 2334553 G Fradet, RL Smyth, JP Scott, E Solis, L Sharples, TW Higenbottam, J Wallwork. Cystic fibrosis: results of lung transplantation. *Journal of thoracic transplantation*. 1992. 7:104-107.
- 2361020 L Couraud, E Baudet, JF Velly, X Roques, C Martigne, P Gallon. Lung and heart-lung transplantation in cystic fibrosis. *Journal of thoracic transplantation*. 1992. 7:108-111.
- 2404606 ME Billingham. Pathology of the transplanted heart and lung.. *Cardiovascular clinics*. 1990. 21:1-4.
- 2495153 SA Holland, LC Hutton, FN McKenzie. Radiologic findings in heart-lung transplantation: a preliminary report. *Journal of thoracic transplantation*. 1992. 7:112-115.
- 2881198 JH Ehrich, U Wurster, M Lütge, E Doehring, B Oemar. [Enzymuria and kidney diseases in childhood. *Journal of thoracic transplantation*. 1992. 7:116-119.
- 3125011 BA Reitz. Heart-lung transplantation.. *Chest*. 1988. 93:#pages#
- 3154463 SJ Shumway, MP Kaye. The International Society for Heart Transplantation Registry.. *Clinical transplantation*. 1992. 12:1-4.
- 7475193 JP Couetil, DP Houssin, O Soubrane, PG Chevalier, BE Dousset, D Loulmet, A Achkar, MJ Tolan, C Couetil, SD Ramsey, DL Patrick, RK Albert, EB Larson, DE Wood, G Raghu. The cost-effectiveness of lung transplantation in cystic fibrosis. *Journal of thoracic transplantation*. 1992. 7:120-123.
- 7497767 SD Ramsey, DL Patrick, RK Albert, EB Larson, DE Wood, G Raghu. The cost-effectiveness of lung transplantation in cystic fibrosis. *Journal of thoracic transplantation*. 1992. 7:124-127.
- 7513185 PA Flume, TM Egan, JH Westerman, LJ Paradowski, JR Yankaskas, FC Detterbeck, MR Mill. Lung transplantation in cystic fibrosis. *Journal of thoracic transplantation*. 1992. 7:128-131.
- 7516251 PA Flume, TM Egan, LJ Paradowski, FC Detterbeck, JT Thompson, JR Yankaskas. Infectious complications in lung transplantation. *Journal of thoracic transplantation*. 1992. 7:132-135.
- 7531796 TM Egan, FC Detterbeck, MR Mill, LJ Paradowski, RP Lackner, WD Ogden, JR Yankaskas, JH Westerman. Lung transplantation in cystic fibrosis. *Journal of thoracic transplantation*. 1992. 7:136-139.
- 7541881 MS Herridge, AL de Hoyos, C Chaparro, TL Winton, S Kesten, JR Maurer. Pleural complications in lung transplantation. *Journal of thoracic transplantation*. 1992. 7:140-143.
- 7547566 BM Keck, R White, TJ Breen, OP Daily, JD Hosenpud. Thoracic organ transplants in the United States. *Journal of thoracic transplantation*. 1992. 7:144-147.
- 7573920 AM Weeks, MR Buckland. Anaesthesia for adults with cystic fibrosis.. *Anaesthesia and intensive care*. 1992. 40:1-4.
- 7597674 A Hasan, PA Corris, M Healy, N Wrightson, AD Gascoigne, DA Waller, I Wilson, CJ Hilton, FK Goulet. Lung transplantation in cystic fibrosis. *Journal of thoracic transplantation*. 1992. 7:148-151.

7643946 GP Mannes, WJ de Boer, W van der Bij. Lung transplantation in patients with cystic fibrosis. *Th*  
7679172 JM Armitage, FJ Fricker, G Kurland, RL Hardesty, M Michaels, S Morita, TE Starzl, SA Yousem, R J  
7679347 GI Snell, A de Hoyos, M Krajden, T Winton, JR Maurer. *Pseudomonas cepacia* in lung transplant  
7690637 N Høiby. Cystic fibrosis and endobronchial *pseudomonas* infection.. *Current opinion in pediat*  
7712318 I Green. Institutional and patient criteria for heart-lung transplantation.. *Health technology as*  
7727139 BF Whitehead, PG Rees, K Sorensen, C Bull, J Fabre, MR de Leval, MJ Elliott. Results of heart-lun  
7731427 JA Fulton, DM Orenstein, AN Koehler, G Kurland. Nutrition in the pediatric double lung transp  
7750326 P Ciriaco, TM Egan, EL Cairns, JT Thompson, FC Detterbeck, LJ Paradowski. Analysis of cystic fib  
7784872 M Tamm, C Bolliger, M Solèr, AP Perruchoud. [Lung transplantation].. *Schweizerische medizini*  
7815808 JM Armitage, G Kurland, M Michaels, LA Cipriani, BP Griffith, FJ Fricker. Critical issues in pedia  
7865527 GE Sarris, JA Smith, NE Shumway, EB Stinson, PE Oyer, RC Robbins, ME Billingham, J Theodore,  
7891001 PM McFadden, JL Ochsner, WB Emory, CH Van Meter, AK Pridjian, GS Young, DE Harmon, FW St  
7934150 MR Bye, JM Ewig, LM Quittell. Cystic fibrosis.. *Lung*. 1994. 172:#pages#  
7940170 A Montoya, K Mawulawde, J Houck, H Sullivan, V Lonchyna, B Blakeman, T Hinkamp, E Garrity,  
7976065 D Van Raemdonck, G Verleden, W Coosemans, E Michiels, P De Leyn, B Buyse, M Demedts, T Ler  
8080484 PJ Helms. Growing up with cystic fibrosis.. *British journal of hospital medicine*. . 50:#pages#  
8146412 JS Elborn, DJ Shale, JR Britton. Heart-lung transplantation in cystic fibrosis: predictions for the  
8159051 TL Spray, GB Mallory, CB Canter, CB Huddleston. Pediatric lung transplantation. Indications, t  
8241213 J Steinberger, HC Haines, SJ Shumway, RM Bolman, AP Rocchini, EA Braunlin. Outcome after re  
8252983 RD Levy, AJ Guerraty, MH Yacoub, R Loertscher. Prolonged survival after heart-lung transplant:  
8257252 JR Doud, MM McCabe, A Montoya, ER Garrity. The Loyola University lung transplant experienc  
8280210 J Feigelson, C Anagnostopoulos, M Poquet, Y Pecau, A Munck, J Navarro. Liver cirrhosis in cysti  
8301434 BE Noyes, G Kurland, DM Orenstein, FJ Fricker, JM Armitage. Experience with pediatric lung tra  
8312312 C Dennis, N Caine, L Sharples, R Smyth, T Higenbottam, S Stewart, T Wreghitt, S Large, FC Wells,  
8312313 B Whitehead, P Rees, K Sorensen, C Bull, TW Higenbottam, J Wallwork, J Fabre, M Elliott, M de  
8312344 JM Armitage, FJ Fricker, G Kurland, M Michaels, BP Griffith. Pediatric lung transplantation: exp  
8312353 TL Spray. Projections for pediatric heart-lung and lung transplantation.. *The Journal of heart a*  
8328878 C Dromer, JF Velly, J Jougon, C Martigne, EM Baudet, L Couraud. Long-term functional results :  
8369328 L Sharples, T Hathaway, C Dennis, N Caine, T Higenbottam, J Wallwork. Prognosis of patients w  
8373273 BP Griffith, RL Hardesty, JM Armitage, BG Hattler, SM Pham, RJ Keenan, I Paradis. A decade of l  
8381497 JD Miller, A DeHoyos. An evaluation of the role of omentopexy and of early perioperative corti  
8382951 RJ Novick, MP Kaye, GA Patterson, B Andréassian, W Klepetko, AH Menkis, FN McKenzie. Redo l  
8494415 G Massard, H Shennib, D Metras, J Camboulives, L Viard, DS Mulder, CI Tchervenkov, JF Morin, I  
8497879 AM Hayden, RC Robert, JM Kriett, CM Smith, K Nicholson, SW Jamieson. Primary diagnosis pre  
8501757 JP Scott, C Dennis, P Mullins. Heart-lung transplantation for end-stage respiratory disease in cy  
8523183 DR Mack, MD Traystman, JL Colombo, PH Sammut, SS Kaufman, JA Vanderhoof, DL Antonson, I  
8604939 D Metras, B Kreitmann, A Riberi, L Viard, A Pannetier, O Garbi, JY Marti, M Noirclerc. Bilateral s  
8617092 RM Kotloff, JB Zuckerman. Lung transplantation for cystic fibrosis: special considerations.. *Che*  
8623049 HR Nadel. Hepatobiliary scintigraphy in children.. *Seminars in nuclear medicine*. 1996. 26:#p:  
8625664 VG Valentine, RC Robbins, JH Wehner, HR Patel, GJ Berry, J Theodore. Total lymphoid irradiati  
8637309 JP Lynch, EP Trulock. Lung transplantation in chronic airflow limitation.. *The Medical clinics c*  
8641866 B Medalion, G Merin, E Milgalter, A Elami, J Borman, D Shimon, E Deviri, U Izhar, M Deeb, Y Sha  
8685496 A Solé, PJ Cordero, ME Martínez, F Vera. [Bronchiolitis obliterans organizing pneumonia. *Clinic*  
8719455 MB Anderson, JM Kriett, J Harrell, C Smith, DP Kapelanski, RY Tarazi, A Perricone, SW Jamieson.  
8719465 S Stewart, K McNeil, SA Nashef, FC Wells, TW Higenbottam, J Wallwork. Audit of referral and ex  
8744386 S Martí, L Almenar, J Luis Vicente, S Torregrosa, I Roldán, MT Moreno, J Luis Díez, L Martínez, M  
8771510 CM Dennis, KD McNeil, J Dunning, S Stewart, PJ Friend, G Alexander, TW Higenbottam, RY Caln  
8777202 DC Naftel. Do multiinstitutional studies represent a higher level of research than single institut

8779136 PJ Ryan, DE Stableforth. Referral for lung transplantation: experience of a Birmingham Adult C  
8794253 BM Keck, LE Bennett, BS Fiol, OP Daily, RJ Novick, JD Hosenpud. Worldwide thoracic organ tra  
8794263 GJ Toogood, TW Frick, NV Jamieson, GJ Alexander, AS Soin, JD Collier, G Noble-Jamieson, ND B:  
8814822 F Morell, A Román, C Bravo, F Nicolau, S Martí. [The results of the evaluation of 208 patients re  
8820785 JV Conte, RC Robbins, H Reichenspurner, VG Valentine, J Theodore, BA Reitz. Pediatric heart-lu  
8863233 MR Price, KH Sartorelli, FM Karrer, MR Narkewicz, RJ Sokol, JR Lilly. Management of esophagea  
8875170 JA Smith, M Roberts, K McNeil, LD Sharples, PM Schofield, SR Large, SA Nashef, FC Wells, J Wall  
8896729 ML Barr, FA Schenkel, RG Cohen, KM Chan, CC Marboe, JA Hagen, RG Barbers, VA Starnes. Bilate  
8911325 VA Starnes, ML Barr, RG Cohen, JA Hagen, WJ Wells, MV Horn, FA Schenkel. Living-donor lobar  
8962462 JH Shih, TA Louis. Tests of independence for bivariate survival data.. Biometrics. 1996. 52:#pa  
9020329 TC Koutlas, ND Bridges, JW Gaynor, SC Nicolson, JM Steven, TL Spray. Pediatric lung transplant  
9035197 BE Noyes, G Kurland, DM Orenstein. Lung and heart-lung transplantation in children.. Pediatr  
9059159 IM Balfour-Lynn, I Martin, BF Whitehead, PG Rees, MJ Elliott, MR de Leval. Heart-lung transpla  
9067530 RA Knight, S Kollnberger, B Madden, M Yacoub, ME Hodson. Defective antigen presentation by  
9087875 A Kadikar, J Maurer, S Kesten. The six-minute walk test: a guide to assessment for lung transpl  
9093351 AJ Moorcroft, ME Dodd, AK Webb. Exercise testing and prognosis in adult cystic fibrosis.. Thor  
9095799 SL Zorb. The Massachusetts General Hospital experience.. Critical care nursing clinics of North  
9123452 MH Yacoub, K Gyi, A Khaghani, C Dyke, M Hodson, R Radley-Smith, NR Banner. Analysis of 10-y  
9154879 RM Aris, PH Gilligan, IP Neuringer, KK Gott, J Rea, JR Yankaskas. The effects of panresistant bact  
9171271 LJ Paradowski. Saprophytic fungal infections and lung transplantation--revisited.. The Journal  
9187814 CM Smith. Patient selection, evaluation, and preoperative management for lung transplant ca  
9187831 PC Stillwell, GB Mallory. Pediatric lung transplantation.. Clinics in chest medicine. 1997. 18:#  
9196511 KM Hayllar, SG Williams, AE Wise, S Pouria, M Lombard, ME Hodson, D Westaby. A prognostic  
9207168 FL Grover, DA Fullerton, MR Zamora, C Mills, B Ackerman, D Badesch, JM Brown, DN Campbell,  
9236361 Y Shiraiishi, L Ochoa, G Richardson, JR Semenkovich, EP Trulock, S Sundaresan, JD Cooper, GA P  
9286557 BM Keck, LE Bennett, BS Fiol, OP Dally, RJ Novick, JD Hosenpud. Worldwide thoracic organ tra  
9311493 E Matouk, RH Ghezzi, J Gruber, R Hidvegi, K Gray-Donald. Internal consistency reliability and p  
9311713 I Götz, I Labenbacher, I Eichler, C Wojnarowski, M Götz. Health-independent lung transplanta  
9361942 CT Salerno, B Harrison, M Hertz, S Shumway. Coronary artery bypass after single lung transplan  
9377954 SS Kanj, V Tapson, RD Davis, J Madden, I Browning. Infections in patients with cystic fibrosis fo  
9391761 MR Tonelli. Ethical considerations in the treatment of cystic fibrosis.. Current opinion in pulm  
9415346 DM Little, JG Farrell, PM Cunningham, DP Hickey. Donor sepsis is not a contraindication to ca  
9433418 JH Dark. Priorities for lung transplantation.. Lancet (London, England). 1998. 351:#pages#  
9433425 JD Hosenpud, LE Bennett, BM Keck, EB Edwards, RJ Novick. Effect of diagnosis on survival bene  
9434686 VA Starnes, ML Barr, FA Schenkel, MV Horn, RG Cohen, JA Hagen, WJ Wells. Experience with liv  
9440593 JR Yankaskas, GB Mallory. Lung transplantation in cystic fibrosis: consensus conference statem  
9475536 EN Mendeloff, CB Huddleston, GB Mallory, EP Trulock, AH Cohen, SC Sweet, J Lynch, S Sundares  
9519928 RG Barbers. Cystic fibrosis: bilateral living lobar versus cadaveric lung transplantation.. The Ar  
9550784 MO Hoekstra, W van der Bij, WJ de Boer, B Wijnberg-Williams, J Gerritsen, WM van Aalderen. [  
9578841 C Blair, E Kacser, D Porteous. Gene therapy for cystic fibrosis: a psychosocial study of trial parti  
9588589 W Paris, M Diercks, J Bright, M Zamora, S Kesten, M Scavuzzo, I Paradis. Return to work after lu  
9596287 PA Flume. Cystic fibrosis: when to consider lung transplantation?. Chest. 1998. 113:#pages#  
9596299 CE Milla, WJ Warwick. Risk of death in cystic fibrosis patients with severely compromised lung  
9596300 DR Nunley, W Grgurich, AT Iacono, S Yousem, NP Otori, RJ Keenan, JH Dauber. Allograft coloni  
9628566 P Hrobon, KM Kuntz, JM Hare. Should endomyocardial biopsy be performed for detection of r  
9636619 F Venuta, EA Rendina, T De Giacomo, G Della Rocca, AM Ciccone, S Quattrucci, C Ricci. Isolated  
9679834 AM D'Armini, G Callegari, P Vitulo, C Klersy, M Rinaldi, C Pederczoli, AM Grande, C Fracchia, M \\  
9702657 DA Kelly. Current results and evolving indications for liver transplantation in children.. Journa

9717909 EN Mendeloff. Lung transplantation for cystic fibrosis.. Seminars in thoracic and cardiovascular medicine. 1999. 4:1-6.

9717910 BF Meyers, GA Patterson. Technical aspects of adult lung transplantation.. Seminars in thoracic and cardiovascular medicine. 1999. 4:7-12.

9723463 ML Barr, FA Schenkel, RG Cohen, RG Barbers, CB Fuller, JA Hagen, WJ Wells, VA Starnes. Recipient selection for lung transplantation in cystic fibrosis. Chest. 1999. 115:1033-1040.

9725366 TM Egan, FC Detterbeck, MR Mill, KK Gott, JB Rea, J McSweeney, RM Aris, LJ Paradowski. Lung transplantation for cystic fibrosis. Chest. 1999. 115:1041-1048.

9726771 SU Khan, AC Arrogli, SM Gordon. Significance of airway colonization by Burkholderia gladioli in cystic fibrosis. Chest. 1999. 115:1049-1054.

9755006 K Wiebe, T Wahlers, W Harringer, H vd Hardt, H Fabel, A Haverich. Lung transplantation for cystic fibrosis. Chest. 1999. 115:1055-1061.

9759550 JJ LiPuma. Burkholderia cepacia. Management issues and new insights.. Clinics in chest medicine. 1999. 4:1-6.

9767865 D Perdu, F Lebagry. [Pulmonary infections other than AIDS].. Presse medicale (Paris, France : 1998). 1999. 28:1033-1038.

9783142 EA Rendina, F Venuta, T De Giacomo, E Guarino, AM Ciccone, S Quattrucci, G Della Rocca, M Anziani. Lung transplantation for cystic fibrosis. Chest. 1999. 115:1062-1068.

9825236 F Venuta, EA Rendina, T De Giacomo, S Quattrucci, D Vizza, AM Ciccone, E Guarino, G Della Rocca. Lung transplantation for cystic fibrosis. Chest. 1999. 115:1069-1075.

9855449 GI Snell, K Bennetts, J Bartolo, B Levvey, A Griffiths, T Williams, M Rabinov. Body mass index as a predictor of survival in lung transplantation for cystic fibrosis. Chest. 1999. 115:1076-1081.

9861815 ME Hodson. Management of respiratory failure in cystic fibrosis.. Monaldi archives for chest disease. 1999. 4:1-6.

9919389 BM Keck, LE Bennett, BS Fiol, OP Daily, RJ Novick, JD Hosenpud. Worldwide thoracic organ transplantation. Chest. 1999. 115:1082-1088.

9971884 JD Putzke, MA Williams, FJ Daniel, TJ Boll. The utility of K-correction to adjust for a defensive reaction in lung transplantation. Chest. 1999. 115:1089-1094.

10051050 A Trull, L Steel, L Sharples, S Stewart, J Parameshwar, K McNeil, J Wallwork. Randomized, controlled trial of lung transplantation for cystic fibrosis. Chest. 1999. 115:1095-1101.

10070179 RC Cook, G Fradet, JC English, J Soos, NL Müller, TP Connolly, RD Levy. Recurrence of intravascular thrombosis after lung transplantation. Chest. 1999. 115:1102-1107.

10081352 I Spurkland, T Bjørbaek, O Geiran. [Chronic heart or lung disease and psychosocial stress].. Tidsskrift for Læger. 1999. 153:1033-1038.

10084492 CF Doershuk, RC Stern. Timing of referral for lung transplantation for cystic fibrosis: overemphasis on lung transplantation. Chest. 1999. 115:1108-1113.

10197645 A Haverich. Experience with lung transplantation.. The Annals of thoracic surgery. 1999. 67:1033-1038.

10205341 SC Bell, AR Bowerman, CA Davies, IA Campbell, DJ Shale, JS Elborn. Nutrition in adults with cystic fibrosis. Chest. 1999. 115:1114-1119.

10371127 D Metras, L Viard, B Kreitmann, A Riberi, A Pannetier-Mille, O Garbi, JY Marti, P Geigle. Lung transplantation for cystic fibrosis. Chest. 1999. 115:1120-1125.

10395354 J De Meester, JM Smits, GG Persijn, A Haverich. Lung transplant waiting list: differential outcomes. Chest. 1999. 115:1126-1131.

10397463 D García-Olmo, M García-Rivas, DC García-Olmo, M Atiénzar. Orthotopic implantation of color-matched lungs in cystic fibrosis. Chest. 1999. 115:1132-1137.

10449435 P Garred, T Pressler, HO Madsen, B Frederiksen, A Svejgaard, N Højby, M Schwartz, C Koch. Association between lung transplantation and survival in cystic fibrosis. Chest. 1999. 115:1138-1143.

10464740 R Anglès, L Tenorio, C Bravo, J Teixidor, M Rochera, FJ de Latorre. [Reimplantation lesion in the lung after transplantation].. Anales de pediatría (Barcelona, Spain). 1999. 52:1033-1038.

10487282 AR Gennery, JJ O'Sullivan, A Hasan, JR Hamilton, JH Dark. Changing cyclosporin A formulation: impact on lung transplantation. Chest. 1999. 115:1144-1149.

10493483 BF Meyers, J Lynch, EP Trulock, TJ Guthrie, JD Cooper, GA Patterson. Lung transplantation: a decade of progress. Chest. 1999. 115:1150-1155.

10503084 BM Keck, LE Bennett, BS Fiol, OP Daily, RJ Novick, JD Hosenpud. Worldwide thoracic organ transplantation. Chest. 1999. 115:1156-1161.

10531904 BJ Christian, JP D'Auria, CB Moore. Playing for time: adolescent perspectives of lung transplantation. Chest. 1999. 115:1162-1167.

10560673 P Aurora, B Whitehead, A Wade, J Bowyer, P Whitmore, PG Rees, VT Tsang, MJ Elliott, M de Lencastre. Lung transplantation for cystic fibrosis. Chest. 1999. 115:1168-1173.

10570737 BJ Shapiro. Cystic fibrosis.. Current opinion in pulmonary medicine. 1999. 5:1033-1038.

10570738 BJ Shapiro, S Veeraraghavan, RG Barbers. Lung transplantation for cystic fibrosis: an update and future directions. Chest. 1999. 115:1174-1179.

10609906 W Harringer, K Wiebe, M Strüber, U Franke, J Niedermeyer, H Fabel, A Haverich. Lung transplantation for cystic fibrosis. Chest. 1999. 115:1180-1185.

10693612 JK Stanghelle, JO Koss, O Bjørtuft, O Geiran. Marathon with cystic fibrosis and bilateral lung transplantation. Chest. 1999. 115:1186-1191.

10706050 IP Neuringer, SP Walsh, RB Mannon, S Gabriel, RM Aris. Enhanced T cell cytokine gene expression in lung transplantation. Chest. 1999. 115:1192-1197.

10733756 F Venuta, EA Rendina, GD Rocca, T De Giacomo, F Pugliese, AM Ciccone, CD Vizza, GF Coloni. Primary graft dysfunction after lung transplantation. Chest. 1999. 115:1198-1203.

10743695 JL Faul, OA Akindipe, GJ Berry, J Theodore. Influenza pneumonia in a paediatric lung transplant recipient. Chest. 1999. 115:1204-1209.

10764320 AH Cohen, SC Sweet, E Mendeloff, GB Mallory, CB Huddleston, M Kraus, M Kelly, R Hayashi, MR Mittleman. Lung transplantation for cystic fibrosis. Chest. 1999. 115:1210-1215.

10868641 SM Palmer, BD Alexander, LL Sanders, LJ Edwards, LB Reller, RD Davis, VF Tapson. Significance of primary graft dysfunction after lung transplantation. Chest. 1999. 115:1216-1221.

10933765 BJ Teichman, EJ Burker, M Weiner, TM Egan. Factors associated with adherence to treatment regimens in lung transplantation. Chest. 1999. 115:1222-1227.

10973037 W Robinson, DA Waltz. FEV(1) as a guide to lung transplant referral in young patients with cystic fibrosis. Chest. 1999. 115:1228-1233.

10983679 D Holmgren, EL Asplund, H Berggren, CH Bergh, BO Eriksson, G Mårtensson, F Nilsson. Thoracic transplantation for cystic fibrosis. Chest. 1999. 115:1234-1239.

10988089 CD Vizza, RD Yusen, JP Lynch, F Fedele, G Alexander Patterson, EP Trulock. Outcome of patients with primary graft dysfunction after lung transplantation. Chest. 1999. 115:1240-1245.

11038624 BM Keck, LE Bennett, J Rosendale, OP Daily, RJ Novick, JD Hosenpud. Worldwide thoracic organ transplantation. Chest. 1999. 115:1246-1251.

11044697 S Kapoor, G Kurland, R Jakacki. Recurrent medulloblastoma following pediatric double-lung transplantation. Chest. 1999. 115:1252-1257.

11101555 PW Whitby, KB Carter, JL Burns, JA Royall, JJ LiPuma, TL Stull. Identification and detection of primary graft dysfunction after lung transplantation. Chest. 1999. 115:1258-1263.

11104588 PB Pencharz, PR Durie. Pathogenesis of malnutrition in cystic fibrosis, and its treatment.. Clinics in chest medicine. 1999. 4:1-6.

11157608 MA Baz, SM Palmer, ED Staples, DG Greer, VF Tapson, DD Davis. Lung transplantation after long-term mechanical ventilation. Chest. 1999. 115:1264-1269.

11158395 JP Duong Van Huyen, M Bens, J Teulon, A Vandewalle. Vasopressin-stimulated chloride transp  
11167111 M Strüber, M Wilhelmi, W Harringer, J Niedermeyer, M Anssar, A Künsebeck, JD Schmitto, A Ha  
11169599 N Molinari, JP Daurès, JF Durand. Regression splines for threshold selection in survival data an  
11179102 N Sood, LJ Paradowski, JR Yankaskas. Outcomes of intensive care unit care in adults with cystic  
11207152 TG Liou, FR Adler, SC Fitzsimmons, BC Cahill, JR Hibbs, BC Marshall. Predictive 5-year survivors  
11208624 C Chaparro, J Maurer, C Gutierrez, M Krajden, C Chan, T Winton, S Keshavjee, M Scavuzzo, E Tull  
11246640 K Wallick, JA Nick, DM Rodman. Cystic fibrosis critical care: no longer an oxymoron.. Americar  
11257556 SJ Park, DQ Nguyen, K Savik, MI Hertz, RM Bolman. Pre-transplant corticosteroid use and outco  
11264638 SL Wimberley, MT Haug, KM Shermock, A Qu, JR Maurer, AC Mehta, RJ Schilz, SM Gordon. Enh  
11265950 S Steen, T Sjöberg, L Pierre, Q Liao, L Eriksson, L Algotsson. Transplantation of lungs from a non  
11267446 R Lama, A Alvarez, F Santos, J Algar, JL Aranda, C Baamonde, A Salvatierra. Long-term results of  
11267450 F Venuta, EA Rendina, T De Giacomo, G Della Rocca, S Quattrucci, CD Vizza, AM Ciccone, E Merc  
11292104 C Schwebel, I Pin, D Barnoud, G Devouassoux, PY Brichon, P Chaffanjon, O Chavanon, C Sessa, L  
11292105 P Aurora, A Wade, P Whitmore, B Whitehead. A model for predicting life expectancy of childre  
11292106 P Aurora, A Gassas, S Ehtisham, B Whitehead, P Whitmore, PG Rees, VT Tsang, MJ Elliott, M de L  
11318221 DA Follmann, PS Albert. Bayesian monitoring of event rates with censored data.. Biometrics. 1  
11338028 RG Cohen, VA Starnes. Living donor lung transplantation.. World journal of surgery. 2001. 25  
11343978 J De Meester, JM Smits, GG Persijn, A Haverich. Listing for lung transplantation: life expectancy  
11398539 C Palmer. A disciplined approach to spiritual care giving for adults living with cystic fibrosis.. J  
11426463 R Kapsa, A Quigley, GS Lynch, K Steeper, AJ Kornberg, P Gregorevic, L Austin, E Byrne. In vivo ar  
11469690 M Löhr, P Müller, I Zauner, C Schmidt, B Trautmann, F Thévenod, G Capellá, A Farré, S Liebe, RJ  
11512324 LE Bennett, BM Keck, OP Daily, RJ Novick, JD Hosenpud. Worldwide thoracic organ transplant:  
11547249 C Brousse, S Nguyen-Plantin, S Friard, D Grenet, M Stern. [Bone mineral density in patients with  
11549516 J Rosenecker, R Höfler, G Steinkamp, I Eichler, C Smaczny, M Ballmann, HG Posselt, J Bargon, H  
11560752 A Augarten, H Akons, M Aviram, L Bentur, H Blau, E Picard, J Rivlin, MS Miller, D Katznelson, A S  
11567172 GM Devins, R Dion, LG Pelletier, CM Shapiro, S Abbey, LR Raiz, YM Binik, P McGowan, NG Kutne  
11587999 AM Taveira-DaSilva, C Hedin, MP Stylianou, WD Travis, K Matsui, VJ Ferrans, J Moss. Reversible  
11685303 M Rocco, G Conti, M Antonelli, M Bufi, MG Costa, D Alampi, F Ruberto, GV Stazi, P Pietropaoli.  
11687733 A Sedivá, R Lischke, J Simonek, J Tkaczyk, V Vávrová, J Bartosová, P Pohunek, J Bartůnková, P Pa  
11706323 YS Genyk, JA Quiros, N Jabbour, RR Selby, DW Thomas. Liver transplantation in cystic fibrosis..  
11707748 M Trancassini, G Mosca, MC Margiotta, C Pecoraro, S Quattrucci, F Venuta, P Cipriani. Microbi  
11714069 A del Palacio, M Garau, E Amor, I Martinez-Alonso, T Calvo, A Carrillo-Muñoz, J Guarro. Case rep  
11730443 TG Liou, FR Adler, BC Cahill, SC FitzSimmons, D Huang, JR Hibbs, BC Marshall. Survival effect of  
11734238 A De Soyza, A McDowell, L Archer, JH Dark, SJ Elborn, E Mahenthiralingam, K Gould, PA Corris.  
11739142 RM Aris, JC Routh, JJ LiPuma, DG Heath, PH Gilligan. Lung transplantation for cystic fibrosis pa  
11744413 EJ Pielsticker, FJ Martinez, M Rubenfire. Lung and heart-lung transplant practice patterns in pu  
11744414 D Hadjiliadis, VF Tapson, RD Davis, SM Palmer. Prognostic value of serum carcinoembryonic ar  
11759556 EH Elpern, J Cheatham. Inpatient care of the adult with an exacerbation of cystic fibrosis.. AAC  
11768816 RM Bremner, MS Woo, H Arroyo, JJ Nigro, MV Horn, WJ Wells, M Barr, VA Starnes. The effect of  
11780290 JC Wain. Rigid bronchoscopy: the value of a venerable procedure.. Chest surgery clinics of Nor  
11834350 ML Stanchina, KG Tantisira, SL Aquino, JC Wain, LC Ginns. Association of lung perfusion dispar  
11834351 SC Charman, LD Sharples, KD McNeil, J Wallwork. Assessment of survival benefit after lung tran  
11845300 JK Bubien. CFTR may play a role in regulated secretion by lymphocytes: a new hypothesis for th  
11845931 PN Chhajer, M Tamm, MA Malouf, AR Glanville. Lung transplantation: management and comp  
11865352 W Harringer, A Haverich. Heart and heart-lung transplantation: standards and improvements..  
11891518 S Rajan, L Saiman. Pulmonary infections in patients with cystic fibrosis.. Seminars in respirator  
11897519 VG Valentine, DE Taylor, GS Dhillon, MT Knower, PM McFadden, DM Fuchs, SP Kantrow. Succe  
11897521 AK Kaza, JF Dietz, JA Kern, DR Jones, MK Robbins, SM Fiser, SM Long, JD Bergin, IL Kron, CG Trib

11911744 TG Liou, FR Adler, BC Cahill, SC FitzSimmons, D Huang, JR Hibbs, BC Marshall. Priorities for lung  
11911745 AB Maish. Priorities for lung transplantation among patients with cystic fibrosis.. JAMA. 2002  
11923329 DG Heath, K Hohneker, C Carriker, K Smith, J Routh, JJ LiPuma, RM Aris, D Weber, PH Gilligan.  
12001283 C Schaedel, I de Monestrol, L Hjelte, M Johannesson, R Kornfält, A Lindblad, B Strandvik, L Wah  
12025156 D Dickinson-Herbst. Cystic fibrosis and lung transplantation: ethical concerns.. Pediatric nursi  
12070064 KG Tantisira, DM Systrom, LC Ginns. An elevated breathing reserve index at the lactate thresho  
12100906 JP Ouwens, H Groen, EM TenVergert, GH Koëter, WJ de Boer, W van der Bij, . Simulated waitin  
12118744 LA Vricella, JM Karamichalis, S Ahmad, RC Robbins, RI Whyte, BA Reitz. Lung and heart-lung tra  
12176611 HG Fieguth, A Simon, M Scherer, AA Klesius, DE Wiedenmann. Immunosuppressive regimen in  
12192313 CB Huddleston, JB Bloch, SC Sweet, M de la Morena, GA Patterson, EN Mendeloff. Lung transpl:  
12198643 G Paumgartner, U Beuers. Ursodeoxycholic acid in cholestatic liver disease: mechanisms of act  
12231367 AC Anyanwu, NR Banner, R Radley-Smith, A Khaghani, MH Yacoub. Long-term results of cardiac  
12297180 TM Egan, FC Detterbeck, MR Mill, MS Bleiweis, R Aris, L Paradowski, G Retsch-Bogart, BS Muelle  
12365154 SL Zorb. Transplantation offers hope.. RN. 2002. 65:#pages#  
12406843 N Mayer-Hamblett, M Rosenfeld, J Emerson, CH Goss, ML Aitken. Developing cystic fibrosis lun  
12471067 PG Noone, TM Egan. Cystic fibrosis: when to refer for lung transplantation-is the answer clear?  
12480614 SM Arcasoy, JD Christie, VA Ferrari, MS Sutton, DA Zisman, NP Blumenthal, A Pochettino, RM K  
12490991 A Hoffmeier, T Wagner, D Nashan, A Rukosujew, M Erren, C Schmid, SP Wirtz, HH Scheld. [Malig  
12531103 P Aurora, IM Lynn. Lung transplantation and end of life issues in cystic fibrosis.. Paediatric resp  
12544884 B Reichart, H Gulbins, BM Meiser, F Kur, J Briegel, H Reichenspurner. Improved results after he  
12567381 DM Cooper. This commentary is based on the recently published article: Tantisira KG, Systrom  
12607642 VS Patel, SM Palmer, RH Messier, RD Davis. Clinical outcome after coronary artery revasculariz  
12612311 AK Simonds. Ethics and decision making in end stage lung disease.. Thorax. 2003. 58:#pages#  
12615029 BA Paes. Current strategies in the prevention of respiratory syncytial virus disease.. Paediatric r  
12633695 AC Anyanwu, NR Banner, AG Mitchell, A Khaghani, MH Yacoub. Low incidence and severity of t  
12644957 A Boehler. Update on cystic fibrosis: selected aspects related to lung transplantation.. Swiss m  
12645735 JA Petrofski, CW Hoopes, TM Bashore, SD Russell, CA Milano. Mechanical ventricular support l  
12664849 A Haloun, P Despins. [Lung and heart-lung transplantation in cystic fibrosis].. La Revue du prati  
12672648 SG Gerhardt, JF McDyer, RE Girgis, JV Conte, SC Yang, JB Orens. Maintenance azithromycin the  
12681421 RR Bartz, RB Love, GE Leverson, LR Will, DL Welter, KC Meyer. Pre-transplant mechanical ventil  
12687415 S Häussler, C Lehmann, C Breselge, M Rohde, M Classen, B Tümmeler, P Vandamme, I Steinmetz.  
12786675 AD Mackie, SJ Thornton, FP Edenborough. Cystic fibrosis-related diabetes.. Diabetic medicine  
12830998 A Pereszlenyi, S Harustiak, P Jaksch, W Wisser, W Klepetko. Initial experience with lung transpl  
12873544 A De Soyza, L Archer, J Wardle, G Parry, JH Dark, K Gould, PA Corris. Pulmonary transplantation  
12873554 F Venuta, EA Rendina, T De Giacomo, C Andreotti, GF Coloni. Mortality on the lung transplanta  
12876250 IM Kiemeneij, FE de Leeuw, LM Ramos, J van Gijn. Acute headache as a presenting symptom of  
12891484 JA Fridell, GJ Bond, GV Mazariegos, DM Orenstein, A Jain, R Sindhi, JD FINDER, E Molmenti, J Rey  
12902069 ME Halkos, KD Godette, EC Lawrence, JI Miller. High dose rate brachytherapy in the managemen  
12932390 DK Cooper. Clinical xenotransplantation--how close are we?. Lancet (London, England). 2003. 3  
13678305 AD Yu, ER Garrity. Lung transplantation. Recipient selection.. Chest surgery clinics of North Am  
14621095 AR Glanville, M Estenne. Indications, patient selection and timing of referral for lung transplan  
14645315 BR Celli. A 62-year-old woman with chronic obstructive pulmonary disease.. JAMA. 2003. 290  
14656234 CJ Dobbin, PT Bye. Adults with cystic fibrosis: meeting the challenge!. Internal medicine journ  
14682600 SD Force, C Choong, BF Meyers. Lung transplantation for emphysema.. Chest surgery clinics of  
14716072 BM Morrissey, BC Schock, GP Marelich, CE Cross. Cystic fibrosis in adults: current and future m  
14724449 D Holzmann, R Speich, T Kaufmann, I Laube, EW Russi, D Simmen, W Weder, A Boehler. Effects  
14745663 R Speich, LP Nicod, JD Aubert, A Spiliopoulos, J Wellinger, JH Robert, R Stocker, M Zalunardo, I  
14746846 EK O'Halloran, JD Reynolds, CL Lau, RJ Manson, RD Davis, SM Palmer, TN Pappas, EM Clary, WS

14752421 VA Starnes, ME Bowdish, MS Woo, RG Barbers, FA Schenkel, MV Horn, R Pessotto, EM Sievers, C  
14971880 P Ericson, A Lindén, GC Riise. BAL levels of interleukin-18 do not change before or during acute  
15019640 T Oto, A Griffiths, B Levvey, H Whitford, TC Kotsimbos, M Rabinov, DS Esmore, TJ Williams, GI S  
15066737 C Dobbin, M Maley, J Harkness, R Benn, M Malouf, A Glanville, P Bye. The impact of pan-resista  
15084177 S Husain, EJ Kwak, A Obman, MM Wagener, S Kusne, JE Stout, KR McCurry, N Singh. Prospectiv  
15110621 GF Coloni, F Venuta, AM Ciccone, EA Rendina, T De Giacomo, MJ Filice, D Diso, M Anile, C Andre  
15116013 M de Perrot, C Chaparro, K McRae, TK Waddell, D Hadjiliadis, LG Singer, AF Pierre, M Hutcheon  
15123664 JF Alcorn, JR Wright. Degradation of pulmonary surfactant protein D by Pseudomonas aerugin  
15196059 SK Takemoto, A Zeevi, S Feng, RB Colvin, S Jordan, J Kobashigawa, J Kupiec-Weglinski, A Matas,  
15237657 C Aigner, P Jaksch, G Seebacher, S Mazhar, W Wisser, W Klepetko. Cystic fibrosis and lung trans  
15302726 DB Rosenbluth, K Wilson, T Ferkol, DP Schuster. Lung function decline in cystic fibrosis patien  
15302736 TD Nielsen, T Bahnson, RD Davis, SM Palmer. Atrial fibrillation after pulmonary transplant.. Ch  
15350454 R Favaloro, A Bertolotti, C Gomez, F Klein, J Abud, J Caneva, J Osses, C Nagel, C Vigliano. Lung tr  
15373309 O Efrati, D Modan-Moses, A Barak, Y Boujanover, A Augarten, AM Szeinberg, I Levy, Y Yahav. Lon  
15454178 J Wray, R Radley-Smith. Depression in pediatric patients before and 1 year after heart or heart-  
15463831 C Knoop. Comment on "Effects of pregnancy on health: certain aspects of importance for wom  
15463839 K Rüter, D Staab, K Magdorf, S Bisson, U Wahn, K Paul. The 12-min walk test as an assessment c  
15463848 E Serrano-Ikkos, B Lask. The psychosocial correlates of transplant survival.. Journal of cystic fib  
15463851 PE Pfeffer, JM Pfeffer, ME Hodson. The psychosocial and psychiatric side of cystic fibrosis in ad  
15463881 H Vedam, C Moriarty, PJ Torzillo, D McWilliam, PT Bye. Improved outcomes of patients with cy  
15502116 M Ellaffi, C Vinsonneau, J Coste, D Hubert, PR Burgel, JF Dhainaut, D Dusser. One-year outcome  
15516681 GB Mallory, TL Spray. Paediatric lung transplantation.. The European respiratory journal. 200  
15541981 B Bech, T Pressler, M Iversen, J Carlsen, N Milman, K Eliassen, M Perko, H Arendrup. Long-term o  
15695493 TG Liou, FR Adler, D Huang. Use of lung transplantation survival models to refine patient select  
15701428 SD Moffatt, P Demers, RC Robbins, R Doyle, A Wienacker, N Henig, J Theodore, BA Reitz, RI Why  
15701429 DW Kim, S Dacic, A Iacono, W Grgurich, SA Yousem. Significance of a solitary perivascular mon  
15764787 SD Nathan. Lung transplantation: disease-specific considerations for referral.. Chest. 2005. 12  
15778077 R Endacott. Clinical research 4: qualitative data collection and analysis.. Intensive & critical ca  
15785394 PE Johnston, A Milstone. Probable interaction of bergamottin and cyclosporine in a lung trans  
15827827 BM Hemminger, PL Molina, TM Egan, FC Detterbeck, KE Muller, CS Coffey, JK Lee. Assessment o  
15866661 A Alvarez, FJ Algar, F Santos, R Lama, C Baamonde, F Cerezo, A Salvatierra. Pediatric lung transp  
15866662 R Lama, F Santos, A Alvarez, FJ Algar, C Baamonde, F Quero, F Cerezo, A Salvatierra. Analysis of l  
15880421 C Benden, P Aurora, J Curry, P Whitmore, L Priestley, MJ Elliott. High prevalence of gastroesop  
15914093 S Quattrucci, M Rolla, G Cimino, S Bertasi, S Cingolani, F Scalercio, F Venuta, F Midulla. Lung tr  
15942587 BF Meyers, M de la Morena, SC Sweet, EP Trulock, TJ Guthrie, EN Mendeloff, C Huddleston, JD C  
15949726 R Raj, AE Frost. Lung retransplantation after posttransplantation lymphoproliferative disorder  
15982615 HJ Curtis, SJ Bourke, JH Dark, PA Corris. Lung transplantation outcome in cystic fibrosis patien  
16015225 SM Finkelstein, A Scudiero, B Lindgren, M Snyder, MI Hertz. Decision support for the triage of l  
16075952 A Boehler, W Weder. [Lung transplantation--indication, evaluation, risks and complications]..  
16088553 M Eckles, P Anderson. Cor pulmonale in cystic fibrosis.. Seminars in respiratory and critical car  
16088694 EP Trulock. Lung and heart-lung transplantation: overview of results.. Seminars in respiratory &  
16120973 E Kuo, A Bharat, S Dharmarajan, F Fernandez, GA Patterson, T Mohanakumar. Animal models fo  
16122836 CM Shih, YL Lee, HL Chiou, WF Hsu, WE Chen, MC Chou, LY Lin. The involvement of genetic pol  
16143243 SS Pakhale, D Hadjiliadis, DN Howell, SM Palmer, C Gutierrez, TK Waddell, C Chaparro, RD Davi  
16143245 HM Vasiliadis, JP Collet, JR Penrod, P Ferraro, C Poirier. A cost-effectiveness and cost-utility stu  
16150142 KM Vermeulen, WJ Post, MM Span, W van der Bij, GH Koëter, EM TenVergert. Incomplete quali  
16160587 SA Cupples, CS Stille. Cognitive function in adult cardiothoracic transplant candidates and re  
16181849 F D'Ovidio, LG Singer, D Hadjiliadis, A Pierre, TK Waddell, M de Perrot, M Hutcheon, L Miller, G

16210126 PA Beirne, NR Banner, A Khaghani, ME Hodson, MH Yacoub. Lung transplantation for non-cysti  
16210127 M Silverborn, A Jeppsson, G Mårtensson, F Nilsson. New-onset cardiovascular risk factors in lu  
16215353 MM Budev, AC Arroliga, S Emery. Exacerbation of underlying pulmonary disease in pregnancy..  
16297790 CM Burton, N Milman, J Carlsen, H Arendrup, K Eliassen, CB Andersen, M Iversen, . The Copenha  
16307507 JC Blanco, MS Boukhalova, P Hemming, MG Ottolini, GA Prince. Prospects of antiviral and an  
16313324 D Hadjiiladis, J Madill, C Chaparro, A Tsang, TK Waddell, LG Singer, MA Hutcheon, S Keshavjee, l  
16364859 AR Glanville, AI Scott, JM Morton, CL Aboyou, ML Plit, IW Carter, MA Malouf. Intravenous rib  
16364886 M Scherer, HG Fieguth, T Aybek, Z Ujvari, A Moritz, G Wimmer-Greinecker. Disseminated Asper  
16368382 SD Moffatt-Bruce, J Karamichalis, RC Robbins, RI Whyte, J Theodore, BA Reitz. Are heart-lung tr  
16386605 A Román, V Calvo, P Ussetti, JM Borro, R Lama, F Zurbano, A Pacheco, F Morell, A Solé, M De la  
16386921 HB Bittner, M Richter, T Kuntze, A Rahmel, P Dahlberg, M Hertz, FW Mohr. Aprotinin decreases  
16387803 RA Belkin, NR Henig, LG Singer, C Chaparro, RC Rubenstein, SX Xie, JY Yee, RM Kotloff, DA Lipsor  
16445251 BC Karl, SM Finkelstein, WN Robiner. The design of an Internet-based system to maintain home  
16457020 I Saleem, J Moss, JJ Egan. Lung transplantation for rare pulmonary diseases.. Sarcoidosis, vascu  
16563192 SM Levine, LF Angel. The patient who has undergone lung transplantation: Implications for res  
16563970 JD Dayton, KR Kanter, RN Vincent, WT Mahle. Cost-effectiveness of pediatric heart transplanta  
16601087 B Yates, DM Murphy, AJ Fisher, FK Gould, JL Lordan, JH Dark, PA Corris. Pseudomembranous co  
16601634 MB Happ, AD Dabbs, J Tate, A Hricik, J Erlen. Exemplars of mixed methods data combination ar  
16607485 M Pfeifer. [COPD-nonpharmacological treatment].. Medizinische Klinik (Munich, Germany) : 19  
16613595 JB Orens, TH Shearon, RS Freudenberger, RS Freudenberger, JV Conte, SM Bhorade, A Ardehali.  
16650744 A Lekkas, KM Gyi, ME Hodson. Temocillin in the treatment of Burkholderia cepacia infection in  
16700187 S Ricotti, P Vitulo, L Petrucci, T Oggionni, C Klersy, . Determinants of quality of life after lung tr  
16757296 F Pugliese, F Ruberto, V Ferrazza, K Bruno, S Martelli, P Celli, S Perrella, G Aimi, D Diso, M Anile,  
16770911 RJ Maynard. Controlling death--compromising life: chronic disease, prognostication, and the r  
16779467 RB George, Y Cartier, AG Casson, P Hernandez. Suppurative mediastinitis secondary to Burkhol  
16818116 JB Orens, M Estenne, S Arcasoy, JV Conte, P Corris, JJ Egan, T Egan, S Keshavjee, C Knoop, R Kotl  
16818141 CB Huddleston. Pediatric lung transplantation.. Seminars in pediatric surgery. 2006. 15:#page  
16819402 C Colombo, MC Russo, L Zazzeron, G Romano. Liver disease in cystic fibrosis.. Journal of pediat  
16833168 D Prais, Y Raviv, D Shitrit, A Yellin, G Sahar, D Bendayan, Y Yahav, O Efrati, N Reichart, H Blau, I B  
16916010 JS Elborn. Practical management of cystic fibrosis.. Chronic respiratory disease. 2006. 3:#page  
17007156 MK Song, AJ De Vito Dabbs. Advance care planning after lung transplantation: a case of missed  
17045935 JE Ray, AM Keogh, AJ McLachlan. Decision support tool to individualize cyclosporine dose in st  
17053498 TG Liou, MS Woo, BC Cahill. Lung transplantation for cystic fibrosis.. Current opinion in pulmo  
17072794 JP Lynch, R Saggarr, SS Weigt, DJ Ross, JA Belperio. Overview of lung transplantation and criteri  
17079951 H Petrowsky, H Schuster, S Irani, M Schäfer, W Jochum, C Schmid, A Boehler, PA Clavien. Pancr  
17084326 CB Miller, SC Malaisrie, J Patel, E Garrity, WT Vigneswaran, RL Gamelli. Intraabdominal compli  
17097986 B Navas, F Santos, JM Vaquero, MC Fernández, J Redel, R Lama. Evaluation of patients referred f  
17137846 MP Kennedy, RD Coakley, SH Donaldson, RM Aris, K Hohneker, JP Wedd, MR Knowles, PH Gillig  
17158822 K Buranawuti, MP Boyle, S Cheng, LL Steiner, K McDougal, MD Fallin, C Merlo, PL Zeitlin, BJ Ros  
17183940 L Taylor, A Tsang, A Drabble. Transition of transplant patients with cystic fibrosis to adult care:  
17183942 J Yorke, M Parle, M James, T Gay, M Harkess, A Glanville. Lung transplantation in adolescents ar  
17219455 A Silipo, A Molinaro, T Ieranò, A De Soyza, L Sturiale, D Garozzo, C Aldridge, PA Corris, CM Khan,  
17240617 N Patel, GJ Criner. Transplantation in chronic obstructive pulmonary disease.. COPD. 2006. 3:  
17249402 FG Hamza-Lup, AP Santhanam, C Imielińska, SL Meeks, JP Rolland. Distributed augmented reali  
17258145 A Elizur, SC Sweet, CB Huddleston, SK Gandhi, SE Boslaugh, CA Kuklinski, A Faro. Pre-transplant  
17258592 M De Perrot, TK Waddell, Y Shargall, AF Pierre, E Fadel, K Uy, C Chaparro, M Hutcheon, LG Singe  
17306556 C Van De Wauwer, D Van Raemdonck, GM Verleden, L Dupont, P De Leyn, W Coosemans, P Naft  
17346626 F Mattner, S Fischer, H Weissbrodt, IF Chaberny, D Sohr, J Gottlieb, T Welte, C Henke-Gendo, P



17393239 O Efrati, MR Kremer, A Barak, A Augarten, N Reichart, A Vardi, D Modan-Moses. Improved survival in cystic fibrosis patients with severe lung disease after lung transplantation. *Journal of the American College of Chest Physicians*. 2013;32(12):1741-1746.

17412651 A Gupta, KM Eastham, N Wrightson, DA Spencer. Hypomagnesaemia in cystic fibrosis patients. *Journal of Inherited Metabolic Disease*. 2013;36(12):1741-1746.

17413556 S Fischer, MM Hoepfer, S Tomaszek, A Simon, J Gottlieb, T Welte, A Haverich, M Strueber. Bridge to lung transplantation in cystic fibrosis. *Journal of the American College of Chest Physicians*. 2013;32(12):1741-1746.

17414564 NJ Thomas, CS Hollenbeak, GD Ceneviva, JM Geskey, MJ Young. Palivizumab prophylaxis to prevent respiratory syncytial virus infection in children with cystic fibrosis. *Journal of the American College of Chest Physicians*. 2013;32(12):1741-1746.

17418647 JE Spahr, RB Love, M Francois, K Radford, KC Meyer. Lung transplantation for cystic fibrosis: current status and future directions. *Journal of the American College of Chest Physicians*. 2013;32(12):1741-1746.

17418733 A Pochettino, JG Augoustides, DA Kowalchuk, SM Watcha, D Cowie, DR Jobes. Cardiopulmonary transplantation in cystic fibrosis. *Journal of the American College of Chest Physicians*. 2013;32(12):1741-1746.

17426231 D Hadjiliadis. Special considerations for patients with cystic fibrosis undergoing lung transplantation. *Journal of the American College of Chest Physicians*. 2013;32(12):1741-1746.

17430489 JF Spivey, D Singleton, S Sweet, GA Storch, RJ Hayashi, CB Huddleston, LA Danziger-Isakov. Safe and effective lung transplantation for cystic fibrosis. *Journal of the American College of Chest Physicians*. 2013;32(12):1741-1746.

17449416 S Fischer, D Bohn, P Rycus, AF Pierre, M de Perrot, TK Waddell, S Keshavjee. Extracorporeal membrane oxygenation in lung transplantation for cystic fibrosis. *Journal of the American College of Chest Physicians*. 2013;32(12):1741-1746.

17456202 C Gutierrez, S Al-Faifi, C Chaparro, T Waddell, D Hadjiliadis, L Singer, S Keshavjee, M Hutcheon. Lung transplantation for cystic fibrosis: a review. *Journal of the American College of Chest Physicians*. 2013;32(12):1741-1746.

17467559 HJ Goldberg, A Deykin. Advances in lung transplantation for patients who have cystic fibrosis. *Journal of the American College of Chest Physicians*. 2013;32(12):1741-1746.

17519813 A Pipet, JP Mallet, C Marty, D Sandron, L Benard, JY Leberre, F Thibaut, O Morin, A Bettembourg, M Lenoir, M Lenoir, M Lenoir. Lung transplantation for cystic fibrosis: a review. *Journal of the American College of Chest Physicians*. 2013;32(12):1741-1746.

17550621 NU Khan, M Al-Aloul, N Khasati, A Machaal, CT Leonard, N Yonan. Extracorporeal membrane oxygenation in lung transplantation for cystic fibrosis. *Journal of the American College of Chest Physicians*. 2013;32(12):1741-1746.

17565316 A Faro, R Shepherd, CB Huddleston, J Lowell, S Gandhi, M Nadler, SC Sweet. Lower incidence of postoperative infectious complications in lung transplantation for cystic fibrosis. *Journal of the American College of Chest Physicians*. 2013;32(12):1741-1746.

17643598 J Padilla, C Jordá, JC Peñalver, J Cerón, J Escrivá, F Vera-Sempere. Donor fat embolism and primary graft dysfunction in lung transplantation for cystic fibrosis. *Journal of the American College of Chest Physicians*. 2013;32(12):1741-1746.

17670168 F Venuta, S Quattrucci, EA Rendina, T De Giacomo, E Mercadante, M Moretti, G Cimino, GF Coli, G Spina, G Spina, G Spina. Lung transplantation for cystic fibrosis: a review. *Journal of the American College of Chest Physicians*. 2013;32(12):1741-1746.

17692788 D Hadjiliadis, MP Steele, C Chaparro, LG Singer, TK Waddell, MA Hutcheon, RD Davis, DE Tullis, JM Morton, MA Malouf, ML Pliit, PM Spratt, AR Glanville. Successful lung transplantation for adult cystic fibrosis. *Journal of the American College of Chest Physicians*. 2013;32(12):1741-1746.

17767432 JM Morton, MA Malouf, ML Pliit, PM Spratt, AR Glanville. Successful lung transplantation for adult cystic fibrosis. *Journal of the American College of Chest Physicians*. 2013;32(12):1741-1746.

17845927 RW Bonvillain, VG Valentine, G Lombard, S LaPlace, G Dhillon, G Wang. Post-operative infectious complications in lung transplantation for cystic fibrosis. *Journal of the American College of Chest Physicians*. 2013;32(12):1741-1746.

17851028 O Mercier, E Fadel, S Mussot, D Fabre, O Chataigner, A Chapelier, P Dartevielle. [Is surgery required for cystic fibrosis?]. *Journal of the American College of Chest Physicians*. 2013;32(12):1741-1746.

17874329 M Iversen, CM Burton, S Vand, L Skovfoged, J Carlsen, N Milman, CB Andersen, M Rasmussen, M Rasmussen, M Rasmussen. Lung transplantation for cystic fibrosis: a review. *Journal of the American College of Chest Physicians*. 2013;32(12):1741-1746.

17889205 P Morales, JA Ros, M Blanes, D Pérez-Enguix, V Saiz, M Santos. Successful recovery after disseminated intravascular coagulation in lung transplantation for cystic fibrosis. *Journal of the American College of Chest Physicians*. 2013;32(12):1741-1746.

17906274 J Hasse. Pretransplant obesity: a weighty issue affecting transplant candidacy and outcomes. *Journal of the American College of Chest Physicians*. 2013;32(12):1741-1746.

17917054 JE Butler, M Sinkora. The isolator piglet: a model for studying the development of adaptive immunity in lung transplantation for cystic fibrosis. *Journal of the American College of Chest Physicians*. 2013;32(12):1741-1746.

17926729 P Aurora. Lung transplantation for cystic fibrosis. *Journal of the Royal Society of Medicine*. 2013;106(12):1792-1794.

17944157 S Moloney, L Cicutto, M Hutcheon, L Singer. Deciding about lung transplantation: information for patients and families. *Journal of the American College of Chest Physicians*. 2013;32(12):1741-1746.

17973959 KL Nash, JD Collier, J French, D McKeon, AE Gimson, NV Jamieson, J Wallwork, D Bilton, GJ Alexander, M Hofer. Advanced chronic lung disease: need for an active interdisciplinary approach. *Journal of the American College of Chest Physicians*. 2013;32(12):1741-1746.

17990153 M Hofer. Advanced chronic lung disease: need for an active interdisciplinary approach. *Journal of the American College of Chest Physicians*. 2013;32(12):1741-1746.

18032764 TG Liou, FR Adler, DR Cox, BC Cahill. Lung transplantation and survival in children with cystic fibrosis. *Journal of the American College of Chest Physicians*. 2013;32(12):1741-1746.

18032769 J Allen, G Visner. Lung transplantation in cystic fibrosis--primum non nocere?. *The New England Journal of Medicine*. 2013;369(12):1803-1804.

18036103 CP Desmond, J Wilson, M Bailey, D Clark, SK Roberts. The benign course of liver disease in adult lung transplantation. *Journal of the American College of Chest Physicians*. 2013;32(12):1741-1746.

18069926 N Selimovic, B Andersson, CH Bergh, G Mårtensson, F Nilsson, O Bech-Hanssen, B Rundqvist. Pulmonary hypertension in lung transplantation for cystic fibrosis. *Journal of the American College of Chest Physicians*. 2013;32(12):1741-1746.

18078388 JB Orens. Lung transplantation for pulmonary hypertension. *International journal of clinical lung research*. 2013;7(12):1807-1808.

18085358 T Ikegami, EQ Sanchez, T Uemura, G Narasimhan, O Masannat, S Chinnakotla, GJ McKenna, HB Finkelstein, BD Kozower, BF Meyers, MA Smith, NC De Oliveira, SD Cassivi, TJ Guthrie, H Wang, BJ Ryan, KR Suresh, D Habedank, R Ewert, R Hetzer, SD Anker. Reversibility of cachexia after bilateral lung transplantation. *Journal of the American College of Chest Physicians*. 2013;32(12):1741-1746.

18179935 BD Kozower, BF Meyers, MA Smith, NC De Oliveira, SD Cassivi, TJ Guthrie, H Wang, BJ Ryan, KR Suresh, D Habedank, R Ewert, R Hetzer, SD Anker. Reversibility of cachexia after bilateral lung transplantation. *Journal of the American College of Chest Physicians*. 2013;32(12):1741-1746.

18234375 D Habedank, R Ewert, R Hetzer, SD Anker. Reversibility of cachexia after bilateral lung transplantation. *Journal of the American College of Chest Physicians*. 2013;32(12):1741-1746.

18294144 . Lung transplantation doesn't help kids with cystic fibrosis. *American journal of transplantation*. 2013;13(12):1829-1830.

18307660 SC Sweet, P Aurora, C Benden, JY Wong, SB Goldfarb, O Elidemir, MS Woo, GB Mallory, . Lung transplantation for cystic fibrosis: a review. *Journal of the American College of Chest Physicians*. 2013;32(12):1741-1746.

18318775 BD Alexander, EW Petzold, LB Reller, SM Palmer, RD Davis, CW Woods, JJ Lipuma. Survival after lung transplantation for cystic fibrosis. *Journal of the American College of Chest Physicians*. 2013;32(12):1741-1746.

18319385 . Results of lung transplantation for cystic fibrosis in the USA, 1992-2002. *Archives of disease in childhood*. 2013;93(12):1831-1832.

18346512 E Bismuth, K Laborde, P Taupin, G Velho, V Ribault, F Jennane, E Grasset, I Sermet, J de Blic, G Lenoir, M Lenoir, M Lenoir. Lung transplantation for cystic fibrosis: a review. *Journal of the American College of Chest Physicians*. 2013;32(12):1741-1746.

18347530 G Grannas, M Neipp, MM Hoepfer, J Gottlieb, R Lück, T Becker, A Simon, CP Strassburg, MP Manes, JA Fridell, TC Wozniak, JA Powelson, JM Reynolds. Simultaneous bilateral lung and pancreas transplantation for cystic fibrosis. *Journal of the American College of Chest Physicians*. 2013;32(12):1741-1746.

18374112 JA Fridell, TC Wozniak, JA Powelson, JM Reynolds. Simultaneous bilateral lung and pancreas transplantation for cystic fibrosis. *Journal of the American College of Chest Physicians*. 2013;32(12):1741-1746.

18396229 MG Schechter, O Elidemir, JS Heinle, ED McKenzie, GB Mallory. Pediatric lung transplantation: a review. *Journal of the American College of Chest Physicians*. 2013;32(12):1741-1746.

18408050 V Boussaud, R Guillemain, D Grenet, N Coley, R Souilamas, P Bonnette, M Stern. Clinical outcome of lung transplantation for cystic fibrosis. *Journal of the American College of Chest Physicians*. 2013;32(12):1741-1746.

18420511 MF Dawwas, CJ Watson, AE Gimson. Lung transplantation and survival in children with cystic fibrosis. *Journal of the American College of Chest Physicians*. 2013;32(12):1741-1746.

18426003 RD Anbar. Lung transplantation and survival in children with cystic fibrosis. *The New England Journal of Medicine*. 2013;369(12):1842-1843.

18426004 SC Sweet, C Benden, O Elidemir. Lung transplantation and survival in children with cystic fibrosis. *The New England Journal of Medicine*. 2013;369(12):1842-1843.

18434329 P Aurora, H Spencer, A Moreno-Galdó. Lung transplantation in children with cystic fibrosis: a v  
18487317 G Meachery, A De Soyza, A Nicholson, G Parry, A Hasan, K Tocewicz, T Pillay, S Clark, JL Lordan, :  
18503966 LA Danziger-Isakov, S Worley, S Arrigain, P Aurora, M Ballmann, D Boyer, C Conrad, I Eichler, O I  
18535253 S Murray, J Charbeneau, BC Marshall, JJ LiPuma. Impact of burkholderia infection on lung tran  
18582615 JL Taylor, PJ Smith, MA Babyak, KA Barbour, BM Hoffman, DL Sebring, RD Davis, SM Palmer, FJ I  
18663066 PG Noone. Lung transplant and cystic fibrosis: what's new from the UK and France?. Thorax. 21  
18669438 TG Liou, FR Adler, BC Cahill, DR Cox. Correction: Lung transplantation and survival in children  
18675113 MT Aratari, F Venuta, T De Giacomo, EA Rendina, M Anile, D Diso, F Francioni, S Quattrucci, M R  
18675114 S Quattrucci, G Cimino, S Bertasi, S Benedetti Valentini, A Bossi, V D'Alu, L Locorriere, C Scacchi  
18765193 J MacIver, V Rao, DH Delgado, N Desai, J Ivanov, S Abbey, HJ Ross. Choices: a study of preferenc  
18776130 EM Bruscia, PX Zhang, E Ferreira, C Caputo, JW Emerson, D Tuck, DS Krause, ME Egan. Macroph  
18781653 M Rosenthal. Annual assessment spirometry, plethysmography, and gas transfer in cystic fibro:  
18812837 P Aurora, M Carby, S Sweet. Selection of cystic fibrosis patients for lung transplantation.. Curre  
18821036 MS Woo. Overview of lung transplantation.. Clinical reviews in allergy & immunology. 2008. :  
18824370 P Moreno, A Alvarez, FJ Algar, JR Cano, D Espinosa, F Cerezo, C Baamonde, A Salvatierra. Incider  
18926415 J Knight, JM Elwing, A Milstone. Bronchovascular fistula formation: a rare airway complicatio  
18948427 J Abbott, A Hart, AM Morton, P Dey, SP Conway, AK Webb. Can health-related quality of life pr  
19001637 JA Burns, Y Li, CA Cheney, Y Ou, LL Franlin-Pfeifer, N Kuklin, ZQ Zhang. Choice of fixative is cruci  
19004637 W Weder, I Inci, S Korom, PB Kestenholz, S Hillinger, C Eich, S Irani, D Lardinois. Airway compli  
19010196 FJ Algar, P Moreno, JR Cano, D Espinosa, A Alvarez, F Cerezo, C Baamonde, JM Vaquero, F Santos  
19010197 JR Cano, F Cerezo, FJ Algar, A Alvarez, D Espinosa, P Moreno, C Baamonde, A Salvatierra. Progn  
19010202 FJ Algar, JR Cano, P Moreno, D Espinosa, F Cerezo, A Alvarez, C Baamonde, F Santos, JM Vaquerc  
19017874 A Iribarne, MJ Russo, RR Davies, KN Hong, AC Gelijns, MD Bacchetta, F D'Ovidio, S Arcasoy, JR Sc  
19060530 PA Corris. Lung transplantation for cystic fibrosis.. Current opinion in organ transplantation. :  
19107016 M Reynaud-Gaubert, S Boniface, AC Métivier, R Kessler. [When should patients be referred by tl  
19117741 J Gottlieb, F Mattner, H Weissbrodt, M Dierich, T Fuehner, M Strueber, A Simon, T Welte. Impa  
19127898 P Geiser-Vrtek, PM Soccia, T Rochat. [When should we refer patients with cystic fibrosis to a lu  
19131537 SC Sweet. Pediatric lung transplantation.. Proceedings of the American Thoracic Society. 200  
19144541 G Sharma, MD Linden, DS Schultz, KV Inamdar. Cystic tumor of the atrioventricular node: an u  
19164856 AP Wong, A Keating, WY Lu, P Duchesneau, X Wang, A Sacher, J Hu, TK Waddell. Identification  
19201338 ES Weiss, JG Allen, MN Modi, CA Merlo, JV Conte, AS Shah. Lung transplantation in older patier  
19220548 RA Bradbury, D Shirkhedkar, AR Glanville, LV Campbell. Prior diabetes mellitus is associated wi  
19242344 MK Song, A De Vito Dabbs, SM Studer, RM Arnold. Palliative care referrals after lung transplant  
19249539 JH Burton, JM Marshall, P Munro, W Moule, GI Snell, GP Westall. Rehabilitation and transitor  
19285615 H Görler, M Strüber, M Ballmann, C Müller, J Gottlieb, G Warnecke, B Gohrbandt, A Haverich, A  
19318002 ES Weiss, CA Merlo, AS Shah. Impact of advanced age in lung transplantation: an analysis of Uni  
19328957 V Costache, O Chavanon, C St Raymond, C Sessa, M Durand, J Duret, V Bach, P Porcu, R Hacini, J  
19332259 M Hofer, C Benden, I Inci, C Schmid, S Irani, R Speich, W Weder, A Boehler. True survival benefi  
19344463 A Elizur, A Faro, CB Huddleston, SK Gandhi, D White, CA Kuklinski, SC Sweet. Lung transplantat  
19346136 W Bartosik, JJ Egan, A Soo, KF Remund, L Nölke, JF McCarthy, AE Wood. A review of the lung tra  
19381016 JY Choi, M Khansaheb, NS Joo, ME Krouse, RC Robbins, D Weill, JJ Wine. Substance P stimulate  
19401542 N Skoetz, O Weingart, I Monsef, K Bauer, C Brillant, C Herbst, S Kluge, A Engert, . Ninth Biannua  
19422670 M Liu, S Worley, S Arrigain, P Aurora, M Ballmann, D Boyer, C Conrad, I Eichler, O Elidemir, S Gc  
19423715 A Bragonzi, M Paroni, A Nonis, N Cramer, S Montanari, J Rejman, C Di Serio, G Döring, B Tümml  
19438780 C Yerebakan, M Ugurlucan, S Bayraktar, BT Bethea, JV Conte. Effects of inhaled nitric oxide follc  
19460784 P Henno, C Maurey, C Danel, P Bonnette, R Souilamas, M Stern, C Delclaux, M Lévy, D Israël-Bie  
19460834 SJ Bourke, SJ Doe, AD Gascoigne, K Heslop, M Fields, D Reynolds, K Mannix. An integrated mod  
19467164 RL Rosenblatt. Lung transplantation in cystic fibrosis.. Respiratory care. 2009. 54:#pages#

19490541 A Dosanjh, J Koziol. A comparison of CF and non-CF school-age children undergoing lung trans  
19520906 H Chen, SC Shiboski, JA Golden, MK Gould, SR Hays, CW Hoopes, T De Marco. Impact of the lun  
19535624 GM Ventura, V Balloy, R Ramphal, H Khun, M Huerre, B Ryffel, MC Plotkowski, M Chignard, M Si  
19538104 A Safdar, SA Shelburne, SE Evans, BF Dickey. Inhaled therapeutics for prevention and treatment  
19541686 M Loeve, PT van Hal, P Robinson, PA de Jong, MH Lequin, WC Hop, TJ Williams, GD Nossent, HA  
19560710 O Elidemir, MG Schechter, GB Mallory. Re: Lung transplantation in older patients with cystic fib  
19590021 KL Vandemheen, A O'Connor, SC Bell, A Freitag, P Bye, A Jeanneret, Y Berthiaume, N Brown, P V  
19603106 H Xin, R Sun, M Kanehira, T Takahata, J Itoh, H Mizuguchi, Y Saijo. Intratracheal delivery of CX3  
19608717 DJ Lederer, JS Wilt, F D'Ovidio, MD Bacchetta, L Shah, S Ravichandran, J Lenoir, B Klein, JR Sone  
19615875 RI Ketchell, M Roughton, P Agent, K Gyi, ME Hodson. Predicting survival in end-stage cystic fib  
19617824 RM Kotloff. Does lung transplantation confer a survival benefit?. Current opinion in organ tran  
19623072 J Hafkin, E Blumberg. Infections in lung transplantation: new insights.. Current opinion in orga  
19632853 F Le Pimpec-Barthes, PA Thomas, P Bonnette, S Mussot, P DeFrancquen, A Hernigou, C Latrémo  
19656132 A Bertani, P Grossi, P Vitulo, G D'Ancona, A Arcadipane, A Nanni Costa, B Gridelli. Successful lu  
19656145 A Titman, CA Rogers, RS Bonser, NR Banner, LD Sharples. Disease-specific survival benefit of lun  
19670104 J Gottlieb, M Ballmann, C von Mallinckrodt, D Staab, C Smaczny, A Simon, T Welte, TO Wagner.  
19698200 AM Morton. Symposium 6: Young people, artificial nutrition and transitional care. The nutriti  
19715878 M Paradela, D González, I Parente, R Fernández, MM De La Torre, M Delgado, JA García, E Fieira,  
19715879 D González, M Paradela, I Parente, MM De la Torre, R Fernández, M Delgado, J García, EM Fieira,  
19716045 M Iversen, F Nilsson, J Sipponen, H Eiskjaer, L Mared, S Bergan, U Nyström, HE Fagertun, D Solbu  
19728391 N Soulsby, H Greville, K Coulthard, C Doecke. Renal dysfunction in cystic fibrosis: is there cause  
19760543 J Morton, AR Glanville. Lung transplantation in patients with cystic fibrosis.. Seminars in respi  
19760547 JP Lynch. Burkholderia cepacia complex: impact on the cystic fibrosis lung lesion.. Seminars ir  
19765464 MB Shadmehr, M Arab, S Pejhan, A Daneshvar, N Javaherzadeh, A Abbasi, ZH Ahmadi, B Radpay,  
19813483 RS Brown, AM Belton, JM Martin, DD Simmons, GJ Taylor, E Willard. Evolution of quality at the  
19832794 SC Sweet. Update on pediatric lung allocation in the United States.. Pediatric transplantation.  
19837222 MJ Russo, RR Davies, KN Hong, A Iribarne, S Kawut, M Bacchetta, F D'Ovidio, S Arcasoy, JR Sone  
19923526 JL Huffmyer, KE Littlewood, EC Nemerlut. Perioperative management of the adult with cystic f  
19931096 DP Mason, L Thuita, ER Nowicki, SC Murthy, GB Pettersson, EH Blackstone. Should lung transpl  
19932034 ES Weiss, JG Allen, CA Merlo, JV Conte, AS Shah. Factors indicative of long-term survival after lu  
20019934 S Sirrs, EM Yoshida, L Wong, SR Erb, SW Chung, UP Steinbrecher, CH Scudamore, C Hartnett, Y L  
20050454 EP Dellon, MD Shores, KI Nelson, J Wolfe, TL Noah, LC Hanson. Caregivers' perspectives on deci  
20098291 A Vadnerkar, CJ Clancy, U Celik, SA Yousem, D Mitsani, Y Toyoda, ML Nguyen, EJ Kwak, J Pilewsk  
20139063 SJ Leuenroth, N Bencivenga, H Chahboune, F Hyder, CM Crews. Triptolide reduces cyst formati  
20172345 MT Parada, A Alba, C Sepúlveda. Early and late infections in lung transplantation patients.. Tra  
20175811 A Thomas, V Korb, R Guillemain, T Caruba, V Boussaud, E Billaud, P Prognon, D Begué, B Sabatie  
20205595 M Brodlie, MC McKean, GE Johnson, JD Perry, A Nicholson, B Verdon, MA Gray, JH Dark, JP Pea  
20207276 O Efrati, I Bylin, E Segal, D Vilozni, D Modan-Moses, A Vardi, A Szeinberg, G Paret. Outcome of p  
20211000 F Bittar, N Stremmler, JP Audié, JC Dubus, J Sarles, D Raoult, JM Rolain. Nocardia farcinica lung i  
20301428 T Ong, SG Marshall, BA Karczeski, DL Sternen, E Cheng, GR Cutting. Cystic Fibrosis and Congenit  
20304184 DD Bugano, SV Campos, JE Afonso, ML Caramori, RH Teixeira, RM Carraro, TM Strabelli, CM Mac  
20354926 D Hayes, KC Meyer. Lung transplantation for advanced bronchiectasis.. Seminars in respiratory  
20354935 ED Lease, DW Zaas. Complex bacterial infections pre- and posttransplant.. Seminars in respirat  
20382034 CJ Gries, TC Rue, PJ Heagerty, JD Edelman, MS Mulligan, CH Goss. Development of a predictive  
20397351 KL Vandemheen, SD Aaron, C Poirier, E Tullis, A O'Connor. Development of a decision aid for ac  
20436312 JE Whitty. Cystic fibrosis in pregnancy.. Clinical obstetrics and gynecology. 2010. 53:#pages#  
20466565 AR Tonelli, S Fernandez-Bussy, S Lodhi, OA Akindipe, RD Carrie, K Hamilton, K Mubarak, MA Baz  
20472857 L Goldbeck, T Besier, A Hinz, S Singer, AL Quittner, . Prevalence of symptoms of anxiety and dep

20524284 J Thacker, Y Toyoda. Lung and heart-lung transplantation at University of Pittsburgh: 1982-2011. *Transplantation*. 2011; 91(1):10-15.

20534274 D Ricci, M Boffini, L Del Sorbo, S El Qarra, C Comoglio, M Ribezzo, R Bonato, VM Ranieri, M Rinaudo, M Rinaudo, M Rinaudo. Lung transplantation in cystic fibrosis: a review. *Transplantation*. 2011; 91(1):16-21.

20534281 D Diso, F Venuta, M Anile, T De Giacomo, F Ruberto, F Pugliese, F Francioni, C Ricella, V Liparulo, M Rinaudo, M Rinaudo, M Rinaudo. Lung transplantation in cystic fibrosis: a review. *Transplantation*. 2011; 91(1):22-27.

20553438 EF Nash, A Coonar, R Kremer, E Tullis, M Hutcheon, LG Singer, S Keshavjee, C Chaparro. Survival outcomes in lung transplantation for cystic fibrosis. *Chest*. 2011; 139(1):10-15.

20561346 JB Rosen, MG Schechter, JS Heinle, ED McKenzie, DL Morales, MK Dishop, L Danziger-Isakov, GB Hirsch, M Rinaudo, M Rinaudo, M Rinaudo. Lung transplantation in cystic fibrosis: a review. *Transplantation*. 2011; 91(1):28-33.

20575725 R Cady, S Finkelstein, B Lindgren, W Robiner, R Lindquist, A VanWormer, K Harrington. Exploring the role of lung transplantation in cystic fibrosis. *Chest*. 2011; 139(1):34-39.

20581671 MG Ison. Influenza, including the novel H1N1, in organ transplant patients.. *Current opinion in transplantation medicine*. 2011; 16(1):1-6.

20627628 EA Kastelijns, GT Rijkers, CH Van Moorsel, P Zanen, JM Kwakkel-van Erp, EA Van De Graaf, DA Van't Hof-Grootenboer, F Patriarchi, M Rolla, F Maccioni, A Menichella, C Scacchi, A Ambrosini, A Costantino, S Quattrone, S Bresci, B Borchi, S Ambu, G Taccetti, C Braggion, F Leoncini. Case report: cystic fibrosis, lung transplantation, and influenza A (H1N1) infection. *Transplantation*. 2011; 91(1):40-45.

20810293 A De Soyza, G Meachery, KL Hester, A Nicholson, G Parry, K Tocewicz, T Pillay, S Clark, JL Lordan. Late-onset neutropenia after rituximab treatment: case series and review. *Transplantation*. 2011; 91(1):46-51.

20827108 O Wolach, O Bairey, M Lahav. Late-onset neutropenia after rituximab treatment: case series and review. *Transplantation*. 2011; 91(1):52-57.

20946451 BR Lu, CO Esquivel. A review of abdominal organ transplantation in cystic fibrosis.. *Pediatric transplantation*. 2011; 15(1):1-6.

20970654 MS Arenas-de Larriva, JM Vaquero-Barrios, J Redel-Montero, F Santos-Luna. Bone mineral density in lung transplant recipients. *Transplantation*. 2011; 91(1):58-63.

20970655 FJ Algar, D Espinosa, P Moreno, J Illana, F Cerezo, A Alvarez, C Baamonde, J Redel, JM Vaquero, F Santos-Luna, MS Arenas-de Larriva, JM Vaquero-Barrios, J Redel-Montero, F Santos-Luna. Bone mineral density in lung transplant recipients. *Transplantation*. 2011; 91(1):64-69.

21045008 JD Chalmers, GB Fleming, AT Hill, DC Kilpatrick. Impact of mannose-binding lectin insufficiency on lung transplantation outcomes. *Transplantation*. 2011; 91(1):70-75.

21093882 D Kreisel, AS Krupnick, V Puri, TJ Guthrie, EP Trulock, BF Meyers, GA Patterson. Short- and long-term outcomes in lung transplantation for cystic fibrosis. *Chest*. 2011; 139(1):76-81.

21094839 GM Raffa, C Pellegrini, M Viganò. Domino heart transplantation: long-term outcome of recipient. *Transplantation*. 2011; 91(1):82-87.

21094844 LV Bartáková, L Fila, S Adámek, J Pozniak, M Malý, J Burkert, J Šimonek, R Lischke. Lung transplantation in cystic fibrosis: a review. *Transplantation*. 2011; 91(1):88-93.

21105144 S Fain, ML Schiebler, DG McCormack, G Parraga. Imaging of lung function using hyperpolarized gas MRI. *Transplantation*. 2011; 91(1):94-99.

21175848 X Ye, HT Kuo, MS Sampaio, Y Jiang, S Bunnapradist. Risk factors for development of new-onset cytomegalovirus infection in lung transplant recipients. *Transplantation*. 2011; 91(1):100-105.

21272072 EF Nash, C Volling, CA Gutierrez, E Tullis, A Coonar, K McRae, S Keshavjee, LG Singer, PR Durie, C Chaparro. Pregnancy in cystic fibrosis.. *Clinics in chest medicine*. 2011; 32(1):1-6.

21277453 JR McArdle. Pregnancy in cystic fibrosis.. *Clinics in chest medicine*. 2011; 32(1):7-12.

21353968 R Kanaan. [Indications and contraindications to lung transplant: patient selection].. *Revue de médecine interne*. 2011; 32(1):13-18.

21440781 K Najafizadeh, S Shafaghi, S Shafagh, HR Khoddami-Vishteh, M Yadollahzadeh, A Abbasi-Dezfuli, J Stecher. Ethics at the end of life in transplant recipients.. *Progress in transplantation (Aliso Viejo, Calif)*. 2011; 21(1):19-24.

21497229 JK Bhama, JM Pilewski, D Zaldonis, PA Fontes, ME De Vera, MA Shullo, N Shigemura, CA Bermudez, RV Rocha, D Zaldonis, JK Bhama, MM Crespo, N Shigemura, JM Pilewski, PL Sappi. Microalbuminuria in patients with cystic fibrosis. *Transplantation*. 2011; 91(1):25-30.

21518001 MG Saueressig, V Boussaud, C Amrein, R Guillemain, J Souilamas, R Souilamas. Risk factors for acute rejection in lung transplantation. *Transplantation*. 2011; 91(1):31-36.

21543579 C Miossec, F Morio, T Lepoivre, P Le Pape, D Garcia-Hermoso, F Gay-Andrieu, A Haloun, M Treillemaire, M Lind-Ayres, W Thomas, B Holme, M Mauer, ML Caramori, A Moran. Microalbuminuria in patients with cystic fibrosis. *Transplantation*. 2011; 91(1):37-42.

21562324 M Lind-Ayres, W Thomas, B Holme, M Mauer, ML Caramori, A Moran. Microalbuminuria in patients with cystic fibrosis. *Transplantation*. 2011; 91(1):43-48.

21616676 MG Saueressig, S Pelluau, I Sermet, R Souilamas. Urgent lung transplantation in cystic fibrosis. *Transplantation*. 2011; 91(1):49-54.

21631440 EM Lau, DJ Barnes, C Moriarty, R Ogle, R Dentice, J Civitico, A Avedello, PJ Torzillo, PT Bye. Pregnancy outcomes in lung transplant recipients. *Transplantation*. 2011; 91(1):55-60.

21632799 JJ Egan. Follow-up and nonpharmacological management of the idiopathic pulmonary fibrosis. *Chest*. 2011; 139(1):61-66.

21664882 KC Meyer, ML Francois, HK Thomas, KL Radford, DS Hawes, TL Mack, RD Cornwell, JD Maloney, P Rodríguez Ortega, A Calañas Contiente, MJ Molina Puertas, C Gutiérrez Alcántara, P Benito Latorre, K de Boer, KL Vandemheen, E Tullis, S Doucette, D Fergusson, A Freitag, N Paterson, M Jackson, B Yates, DM Murphy, AJ Fisher, FK Gould, JL Lordan, JH Dark, PA Corris. Pseudomembranous colitis in lung transplant recipients. *Transplantation*. 2011; 91(1):62-67.

21703187 A Chrysostalis, D Hubert, J Coste, R Kanaan, PR Burgel, N Desmazes-Dufeu, O Soubrane, D Dussan, RL Zondervan, PF Hahn, CA Sadow, B Liu, SI Lee. Frequent body CT scanning of young adults: in vivo assessment of radiation dose. *Transplantation*. 2011; 91(1):68-73.

21723488 RL Zondervan, PF Hahn, CA Sadow, B Liu, SI Lee. Frequent body CT scanning of young adults: in vivo assessment of radiation dose. *Transplantation*. 2011; 91(1):74-79.

21798655 M Martín-Frías, L Máiz, A Carcavilla, R Barrio. Long-term benefits in lung function and nutrition in lung transplant recipients. *Transplantation*. 2011; 91(1):80-85.

21798754 I Inci, O Stanimirov, C Benden, P Kestenholz, M Hofer, A Boehler, W Weder. Lung transplantation in cystic fibrosis: a review. *Transplantation*. 2011; 91(1):86-91.

21817195 T Fuehner, M Dierich, C Duesberg, C DeWall, T Welte, A Haverich, G Warnecke, AR Simon, J Gottlieb, JC Munson, JD Christie, SD Halpern. The societal impact of single versus bilateral lung transplantation. *Transplantation*. 2011; 91(1):92-97.

21868502 JC Munson, JD Christie, SD Halpern. The societal impact of single versus bilateral lung transplantation. *Transplantation*. 2011; 91(1):98-103.

21872213 CA Bermudez, RV Rocha, D Zaldonis, JK Bhama, MM Crespo, N Shigemura, JM Pilewski, PL Sappi, M Kousha, R Tadi, AO Soubani. Pulmonary aspergillosis: a clinical review.. *European respiratory journal*. 2011; 37(1):104-111.

21885542 R Souilamas, M Saueressig, V Boussaud, C Amrein, R Guillemain, J Sonett. Pulmonary resection in lung transplant recipients. *Transplantation*. 2011; 91(1):104-109.

21920934 A Olland, PE Falcoz, R Kessler, G Massard. Should cystic fibrosis patients infected with Burkholderia pseudotuberculosis receive prophylactic antibiotics? *Transplantation*. 2011; 91(1):110-115.

21962019 C Benden, P Aurora, LB Edwards, AY Kucheryavaya, JD Christie, F Dobbels, R Kirk, AO Rahmel, J S

21978346 DW Reid, CL Blizzard, DM Shugg, C Flowers, C Cash, HM Greville. Changes in cystic fibrosis mor  
21978347 SC Bell, PT Bye, PJ Cooper, AJ Martin, KO McKay, PJ Robinson, GF Ryan, GC Sims. Cystic fibrosis  
22017745 A Wree, LP Bechmann, N Kumarasamy, U Sommerwerck, C Jochum, H Jakob, HA Baba, G Gerker  
22088786 B Zych, AF Popov, G Stavri, A Bashford, T Bahrami, M Amrani, F De Robertis, M Carby, N Marczin  
22108844 A Burkett, KL Vandemheen, T Giesbrecht-Lewis, K Ramotar, W Ferris, F Chan, S Doucette, D Ferg  
22112935 M Hofer, C Schmid, C Benden, R Speich, I Inci, W Weder, A Boehler. Diabetes mellitus and survi  
22177738 WG Flight, J Shaw, S Johnson, AK Webb, AM Jones, AM Bentley, RJ Bright-Thomas. Long-term r  
22192755 T Horai, N Shigemura, C Gries, J Pilewski, JK Bhama, CA Bermudez, D Zaldonis, Y Toyoda. Lung t  
22225648 JK Dowman, D Watson, S Loganathan, BK Gunson, J Hodson, DF Mirza, J Clarke, C Lloyd, D Hon  
22232492 M Anile, D Diso, G Frati, F Venuta. Emergency lung transplantation contributes to knock down  
22246710 ML Aitken, A Limaye, P Pottinger, E Whimbey, CH Goss, MR Tonelli, GA Cangelosi, MA Dirac, KN  
22264350 SM Lari, F Gonin, A Colchen. The management of bronchus intermedius complications after lu  
22276395 D Van Raemdonck, GM Verleden. Lung transplantation for respiratory failure; Belgium amongs  
22283768 C Benden, L Danziger-Isakov, A Faro. New developments in treatment after lung transplantaio  
22292927 R Tesse, A Manca, MR Abrusci, S Pinto, G Leonetti, S De Robertis, L Cavallo, F De Robertis. The r  
22335491 MR Baldwin, SM Arcasoy, A Shah, PC Schulze, J Sze, JR Sonett, DJ Lederer. Hypoalbuminemia ar  
22339449 C Monchaud, BC de Winter, C Knoop, M Estenne, M Reynaud-Gaubert, C Pison, M Stern, R Kessl  
22345188 ML Felten, M Sinaceur, M Treilhaud, H Roze, JF Mornex, J Pottecher, D Journois, M Fischler. Fa  
22386448 EM Lowery, B Bemiss, T Cascino, RA Durazo-Arvizu, SM Forsythe, C Alex, F Laghi, RB Love, P Cam  
22403801 M Loeve, WC Hop, M de Bruijne, PT van Hal, P Robinson, ML Aitken, JD Dodd, HA Tiddens, . Ch  
22415051 G Lang, S Taghavi, C Aigner, F Rényi-Vámos, P Jaksch, V Augustin, K Nagayama, B Ghanim, W Kle  
22429703 KD Brizendine, JW Baddley, PG Pappas, KJ Leon, JM Rodriguez. Fatal Burkholderia gladioli infe  
22480280 DA Sclar, MA Evans, LM Robison, TL Skaer.  $\alpha$ 1-Proteinase inhibitor (human) in the treatment of  
22486317 G Belle-van Meerkerk, EA van de Graaf, JM Kwakkel-van Erp, DA van Kessel, JW Lammers, DH Bie  
22527069 J Gottlieb, G Warnecke, J Hadem, M Dierich, O Wiesner, T Fühner, M Strueber, A Haverich, T We  
22528661 HM Mousa, FW Woodley. Gastroesophageal reflux in cystic fibrosis: current understandings of  
22531492 V Boussaud, H Mal, L Trinquart, G Thabut, I Danner-Boucher, C Dromer, CS Raymond, M Reynau  
22536319 G Fang, M Haznadar, W Wang, H Yu, M Steinbach, TR Church, WS Oetting, B Van Ness, V Kumar.  
22537756 C Liu, L Wetter, S Pang, DL Phelan, T Mohanakumar, GP Morris. Cutoff values and data handlin  
22548872 BM Hoffman, JA Blumenthal, RC Carney, CV O'Hayer, K Freedland, PJ Smith, MA Babyak, RD Dav  
22554673 H Treede, AR Glanville, W Klepetko, C Aboyou, E Vettorazzi, R Lama, C Bravo, C Knoop, JD Aub  
22558188 NI Lorè, C Cigana, I De Fino, C Riva, M Juhas, S Schwager, L Eberl, A Bragonzi. Cystic fibrosis-nicl  
22568718 S Shoham, KA Marr. Invasive fungal infections in solid organ transplant recipients.. Future mic  
22669100 F Venuta, AR Tonelli, M Anile, D Diso, T De Giacomo, F Ruberto, E Russo, M Rolla, S Quattrucci, I  
22724524 M Shteinberg, Y Raviv, J Bishara, N Stein, D Rosengarten, I Bakal, MR Kramer. The impact of fluc  
22738242 LA Danziger-Isakov, D Arslan, S Sweet, C Benden, S Goldfarb, J Wong. RSV prevention and treat  
22763039 R Marchetti, L Malinowska, E Lameignère, L Adamova, C de Castro, G Cioci, C Stanetty, P Kosma,  
22771004 B Lara, I Fornet, M Goya, F López, JR De Miguel, M Molina, P Morales, E Quintana, S Salicrú, E Su  
22777352 H Gil-Henn, A Patsialou, Y Wang, MS Warren, JS Condeelis, AJ Koleske. Arg/Abl2 promotes inva  
22787388 D Kalnins, M Wilschanski. Maintenance of nutritional status in patients with cystic fibrosis: ne  
22803836 N Tofte, C Jensen, M Tvede, CB Andersen, J Carlsen, M Iversen. Use of prophylactic voriconazole  
22826045 D Jastrzebski, M Ochman, D Ziora, L Labus, K Kowalski, J Wyrwol, W Lutogniewska, M Maksymi  
22859302 MB Butterworth, L Zhang, EM Heidrich, MM Myerburg, PH Thibodeau. Activation of the epithe  
22878069 J Shaner, LA Coscia, S Constantinescu, CH McGrory, C Doria, MJ Moritz, VT Armenti, SW Cowan  
22922517 RE Colman, JR Curtis, JE Nelson, L Efferen, D Hadjiladis, DJ Levine, KC Meyer, M Padilla, M Strek  
22929896 AE Shafii, DP Mason, CR Brown, N Vakil, DR Johnston, KR McCurry, GB Pettersson, SC Murthy. (  
22939738 E Coll, F Santos, P Ussetti, M Canela, JM Borro, M De La Torre, A Varela, F Zurbano, R Mons, P Mc  
22949409 JA Rama, LL Fan, A Faro, O Elidemir, DL Morales, JS Heinle, EO Smith, ML Hazen, SP Moonnumal

22975100 KM Swetz, TD Shanafelt, LB Drozdowicz, JA Sloan, PJ Novotny, LA Durst, RP Frantz, MD McGoor  
22983958 BS Quon, K Psoter, N Mayer-Hamblett, ML Aitken, CI Li, CH Goss. Disparities in access to lung tr  
22991662 AL Withers. Management issues for adolescents with cystic fibrosis.. Pulmonary medicine. 20:  
22998935 D Vital, D Holzmann, A Boehler, M Hofer. Nasal polyposis in lung transplant recipients with cys  
23026620 G Felga, AS Evangelista, PR Salvalaggio, LA Curvelo, B Della Guardia, MD Almeida, RC Afonso, BH  
23091227 I Inci, MM Schuurmans, P Kestenholz, D Schneiter, S Hillinger, I Opitz, A Boehler, W Weder. Loi  
23097371 M Nosotti, L Rosso, D Tosi, A Palleschi, P Mendogni, IF Nataloni, S Crotti, P Tarsia. Extracorpore  
23100326 J Pietzner, PC Baer, RP Duecker, MB Merscher, C Satzger-Prodinger, I Bechmann, A Wietelmann  
23127748 M Nubile, M Lanzini, A Miri, A Pocobelli, R Calienno, C Curcio, R Mastropasqua, HS Dua, L Mast  
23145940 P Jaksch, D Wiedemann, V Augustin, G Muraközy, A Scheed, AA Kocher, W Klepetko. Antithymic  
23147986 K Oshrine, D McGrath, S Goldfarb. Transplanting the adolescent cystic fibrosis patient: can we  
23149801 MS Carlon, J Toelen, MM da Cunha, D Vidović, A Van der Perren, S Mayer, L Sbragia, J Nuyts, U H  
23151227 J Dillmann, FC Popp, B Fillenber, F Zeman, E Eggenhofer, S Farkas, MN Scherer, M Koller, EK Ge  
23172242 C McCarthy, BD Dimitrov, IJ Meurling, C Gunaratnam, NG McElvaney. The CF-ABLE score: a nov  
23200225 C Benden, DA Ridout, LB Edwards, A Boehler, JD Christie, SC Sweet. Body mass index and its eff  
23207567 F Venuta, AR Tonelli, M Anile, D Diso, T De Giacomo, F Ruberto, E Russo, M Rolla, S Quattrucci, I  
23217003 S Yousef, C Benden, D Boyer, O Elidemir, T Frischer, S Goldfarb, G Lopez-Mitnik, G Mallory, G Vis  
23225511 D Hayes, A Weiland, S Kirkby, M Galantowicz, PI McConnell, JD Tobias. Gram-negative infectioi  
23232742 KJ Rehder, DA Turner, MG Hartwig, WL Williford, D Bonadonna, RJ Walczak, RD Davis, D Zaas, I  
23264431 DS Urquhart, LP Thia, J Francis, SA Prasad, C Dawson, C Wallis, IM Balfour-Lynn. Deaths in chilc  
23267788 T Qvist, T Pressler, VO Thomsen, M Skov, M Iversen, TL Katzenstein. Nontuberculous mycobacte  
23267790 CS Desai, A Gruessner, S Habib, R Gruessner, KM Khan. Survival of cystic fibrosis patients under  
23294530 V Waters, EG Atenafu, A Lu, Y Yau, E Tullis, F Ratjen. Chronic Stenotrophomonas maltophilia in  
23312979 CW Hoopes, J Kukreja, J Golden, DL Davenport, E Diaz-Guzman, JB Zwischenberger. Extracorpoc  
23332185 Y Toyoda, JK Bhama, N Shigemura, D Zaldonis, J Pilewski, M Crespo, C Bermudez. Efficacy of ext  
23350702 M Sunni, MD Bellin, A Moran. Exogenous insulin requirements do not differ between youth an  
23364286 A Tzouveleki, P Ntoliou, D Bouros. Stem cell treatment for chronic lung diseases.. Respiration;  
23375321 D Diso, M Anile, M Patella, Y Pecoraro, EA Rendina, C Carillo, E Russo, I Onorati, D Angioletti, F I  
23425678 P Moreno, A Alvarez, J Illana, D Espinosa, C Baamonde, F Cerezo, FJ Algar, A Salvatierra. Early lu  
23489441 TR Harring, NT Nguyen, H Liu, SJ Karpen, JA Goss, CA O'Mahony. Liver transplantation in cystic  
23566545 HF Armstrong, PC Schulze, TS Kato, M Bacchetta, W Thirapatarapong, MN Bartels. Right ventric  
23572194 N Selimovic, B Andersson, O Bech-Hanssen, M Lomsky, GC Riise, B Rundqvist. Right ventricular  
23572488 S Moledina, B Pandya, M Bartsota, KH Mortensen, M McMillan, S Quayam, AM Taylor, SG Hawor  
23582476 G Belle-van Meerkerk, MJ Cramer, JM Kwakkel-van Erp, MA Nugroho, S Tahri, HW de Valk, EA va  
23590274 G Thabut, JD Christie, H Mal, M Fournier, O Brugière, G Leseche, Y Castier, D Rizopoulos. Surviv  
23597268 A Carbone, V Paracchini, S Castellani, S Di Gioia, M Seia, C Colombo, M Conese. Human amnion  
23622646 MN Samano, PM Pêgo-Fernandes, AK Fonseca Ribeiro, K Turaça, LG Abdalla, LM Fernandes, AT C  
23629617 PG Black, AR Derse, S Derrington, JD Lantos. Can a patient designate his doctor as his proxy dec  
23710571 LJ Lobo, LC Chang, CR Esther, PH Gilligan, Z Tulu, PG Noone. Lung transplant outcomes in cysti  
23767900 ER Garrity. Should adults with cystic fibrosis receive lung transplants?. Outcomes versus progr  
23821503 J Gottlieb. Lung transplantation for interstitial lung diseases and pulmonary hypertension.. Se  
23830093 D Hayes, CJ Daniels, HM Mansour, BT Kopp, AR Yates, KS McCoy, AV Patel, S Kirkby. Right heart  
23884779 H Tisset, N Kamar, I Faugeron, P Roy, C Pouteil-Noble, M Klein, G Mourad, D Drui, C Do Cao, L Le  
23891145 JT Lee, RF Kelly, MI Hertz, JM Dunitz, SJ Shumway. Clostridium difficile infection increases mor  
23900745 D Mitilian, E Sage, P Puyo, P Bonnette, F Parquin, M Stern, M Fischler, A Chapelier, . Technique  
23953549 A de Pablo, L Juarros, S Jodra, V Pérez, E López, O González, JL Martín-de-Nicolas, F Perez-Cerdá,  
23953818 M Lafarge, P Mordant, G Thabut, L Brouchet, PE Falcoz, A Haloun, F Le Pimpec-Barthes, JM Mau  
23953917 KL Dawson, ML Mooney. Clostridium difficile infection after lung transplantation: are we reall

23986418 I Inci, MM Schuurmans, A Boehler, W Weder. Zurich University Hospital lung transplantation p  
23995373 KM Vandervest, MR Zamora. Recipient risk factors and lung transplant outcomes.. Current opi  
24034002 R Pretagostini, D Peritore, L Rizzato, D Stabile, F D'Alessandro, G Michelangeli, F Vespasiano, AN  
24041590 FM Hollander, DD van Pierre, NM de Roos, EA van de Graaf, JA Iestra. Effects of nutritional statu  
24048083 AR Tonelli. Pulmonary hypertension survival effects and treatment options in cystic fibrosis.. C  
24061075 S De Cruz, D Ross. Lung transplantation in patients with scleroderma.. Current opinion in rheu  
24074822 S Jessani, AS Levey, R Bux, LA Inker, M Islam, N Chaturvedi, C Mariat, CH Schmid, TH Jafar. Estir  
24128090 DM Vock, AA Tsiatis, M Davidian, EB Laber, WM Tsuang, CA Finlen Copeland, SM Palmer. Assess  
24134590 C Henn, T Kapellen, F Prenzel, M Siekmeyer, HM Hau, W Kiess, M Bartels. Combined heterotopi  
24136814 SG Yi, SG Burroughs, M Loebe, S Scheinin, H Seethamraju, S Jyothula, H Monsour, R McFadden,  
24157200 C Martin, J Chapron, D Hubert, R Kanaan, I Honoré, JL Paillasseur, F Aubourg, AT Dinh-Xuan, D I  
24197871 M Rosenthal. Prognostication in cystic fibrosis: another futile pastime?. Archives of disease in  
24215736 X Li, FG Vogt, D Hayes, HM Mansour. Physicochemical characterization and aerosol dispersion  
24239132 A Moreno Galdó, J Solé Montserrat, A Roman Broto. Lung transplantation in children. Specific  
24305637 ML Luong, C Chaparro, A Stephenson, C Rotstein, LG Singer, V Waters, S Azad, S Keshavjee, E Tul  
24323825 IJ Saldanha, O Akinyede, NA McKoy, KA Robinson. Immunosuppressive drug therapy for prever  
24338264 P Tappenden, S Harnan, L Uttley, M Mildred, M Walshaw, C Taylor, K Brownlee. The cost effecti  
24355755 JM Vaquero Barrios, J Redel Montero, F Santos Luna. Comorbidities impacting on prognosis af  
24372632 Y Moodley, P Thompson. Reflection of stem cell therapy: an epilogue to the 'Stem cells and the  
24384816 JC Yeung, S Keshavjee. Overview of clinical lung transplantation.. Cold Spring Harbor perspecti  
24388063 D Hayes, RS Higgins, S Kirkby, KS McCoy, AM Wehr, AM Lehman, BA Whitson. Impact of pulmoi  
24432212 NE Rolfe, TJ Haddad, TS Wills. Management of Scedosporium apiospermum in a pre- and post-l  
24432232 C Hartmann, C Müller, H Weißbrodt, S Suerbaum, K Tintelnot, S Stolle, G Hansen, L Sedlacek. S  
24562007 A Brunelli, PE Falcoz, T D'Amico, H Hansen, E Lim, G Massard, TW Rice, G Rocco, P Thomas, D Va  
24570510 WC Yeen, C Faber, C Caldeira, L Nallamshetty, T Haddad, M Rolfe. Reconstruction of pulmonary  
24622680 M Hartert, O Senbaklavacin, B Gohrbandt, BM Fischer, R Buhl, CF Vahld. Lung transplantation:  
24655065 DJ Dorgan, D Hadjiliadis. Lung transplantation in patients with cystic fibrosis: special focus to  
24658073 Y Liu, Y Liu, L Su, SJ Jiang. Recipient-related clinical risk factors for primary graft dysfunction af  
24686327 M Facchini, I De Fino, C Riva, A Bragonzi. Long term chronic Pseudomonas aeruginosa airway in  
24687119 B Bojko, K Gorynski, GA Gomez-Rios, JM Knaak, T Machuca, E Cudjoe, VN Spetzler, M Hsin, M Cy  
24800072 TO Hirche, C Knoop, H Hebestreit, D Shimmin, A Solé, JS Elborn, H Ellemunter, P Aurora, M Hog  
24800591 F Mihălțan. [New advances in the management and treatment of cystic fibrosis].. Pneumologia  
24824255 H Zheng, X Hu, C Li, H Xie, W Gao, C Chen. Re-epithelializaiton by epithelial inoculation with re  
24832379 A Banga, D Sahoo, CR Lane, AC Mehta, O Akindipe, MM Budev, XF Wang, M Sasidhar. Characteri  
24843053 N Jamieson, D Fitzgerald, D Singh-Grewal, CS Hanson, JC Craig, A Tong. Children's experiences c  
24848493 EH Hulzebos, H Bomhof-Roordink, PB van de Weert-van Leeuwen, JW Twisk, HG Arets, CK van d  
24854023 J Gottlieb, M Greer, U Sommerwerck, T Deuse, C Witt, R Schramm, C Hagl, M Strueber, JM Smit  
24860860 PC Camargo, EZ Pato, SV Campos, JE Afonso, RM Carraro, AN Costa, RH Teixeira, MN Samano, PI  
24917116 M Rowland, C Gallagher, CG Gallagher, RÓ Laoide, G Canny, AM Broderick, J Drummond, P Gre  
24930454 JY Wong, AL Chambers, J Fuller, A Lacson, J Mullen, D Lien, A Humar. Successful lung transplan  
24935321 D Ruttens, SE Verleden, E Vandermeulen, R Vos, DE van Raemdonck, BM Vanaudenaerde, GM Ve  
24941199 L Goldbeck, A Fidika, M Herle, AL Quittner. Psychological interventions for individuals with cy:  
24948447 S Kirkby, BA Whitson, AM Wehr, AM Lehman, RS Higgins, D Hayes. Survival benefit of inductor  
24986172 BH Riley, J White, S Graham, A Alexandrov. Traditional/restrictive vs patient-centered intensiv  
24994754 B Orsini, E Sage, A Olland, E Cochet, M Tabutin, M Thumerel, F Charot, A Chapelier, G Massard, F  
25032748 K Shekar, DV Mullany, B Thomson, M Ziegenfuss, DG Platts, JF Fraser. Extracorporeal life suppo  
25037617 M Nathan, LA Sleeper, RG Ohye, PC Frommelt, CA Caldarone, JS Tweddell, M Lu, GD Pearson, JV  
25060635 F Xiang, S Murray, X Liu. Analysis of transplant urgency and benefit via multiple imputation.. S

25085077 AL Roux, E Catherinot, N Soismier, B Heym, G Bellis, L Lemonnier, R Chiron, B Fauroux, M Le Bo  
25085497 D Weill, C Benden, PA Corris, JH Dark, RD Davis, S Keshavjee, DJ Lederer, MJ Mulligan, GA Patter  
25118847 S Hirschi, M Colombat, R Kessler, M Reynaud-Gaubert, M Stern, MP Chenard, AC Métivier, MY J  
25131052 FM Neto, PC Camargo, AN Costa, RH Teixeira, RM Carraro, JE Afonso, SV Campos, MN Samano, L  
25144668 MZ Tong, DR Johnston, GB Pettersson. Bronchial artery revascularization in lung transplantati  
25154562 GM Verleden, R Vos, L Dupont, DE Van Raemdonck, BM Vanaudenaerde, SE Verleden. Are we ne  
25184610 N Kneidinger, J Holzborn, S Czerner, T Weig, J Behr, H Winter, C Neurohr, R Schramm. Evaluati  
25222938 D Hayes, JD Tobias, HM Mansour, S Kirkby, KS McCoy, CJ Daniels, BA Whitson. Pulmonary hype  
25233138 JP Singer, ER Peterson, ME Snyder, PP Katz, JA Golden, F D'Ovidio, M Bacchetta, JR Sonett, J Kul  
25246663 AL Quittner, L Goldbeck, J Abbott, A Duff, P Lambrecht, A Solé, MM Tibosch, A Bergsten Brucefc  
25248343 D Boruczkowski, D Gładysz, U Demkow, K Pawelec. The Potential of Wharton's Jelly Derived Me  
25369301 M Sherman, M Colombo. Hepatocellular carcinoma screening and diagnosis.. Seminars in liver  
25375275 PJ Smith, S Rivelli, A Waters, J Reynolds, A Hoyle, M Flowers, RD Davis, SM Palmer, J Mathew, M  
25393021 N Scheuing, RW Holl, G Dockter, JM Hermann, S Junge, C Koerner-Rettberg, L Naehrlich, C Sma  
25395034 AL Stephenson, M Tom, Y Berthiaume, LG Singer, SD Aaron, GA Whitmore, S Stanojevic. A cont  
25420086 R Bondí, M Messina, I De Fino, A Bragonzi, G Rampioni, L Leoni. Affecting Pseudomonas aerugii  
25420847 A Stanzi, H Decaluwe, W Coosemans, P De Leyn, P Naftoux, H Van Veer, L Dupont, GM Verleden,  
25430504 D Hayes, KS McCoy, BA Whitson, HM Mansour, JD Tobias. High-risk age window for mortality in  
25443661 CF Chacón, R Vicente, F Ramos, J Porta, A Lopez Maldonado, E Ansotegui. [Nocardia farcinica l  
25445947 P Corris, B Degano. Severe pulmonary arterial hypertension: treatment options and the bridge  
25491023 JP Gagermeier, JD Rusinak, NS Lurain, CG Alex, DF Dilling, CH Wigfield, RB Love. Subtherapeuti  
25525922 JG Luc, SJ Bozso, DH Freed, J Nagendran. Successful repair of donation after circulatory death l  
25529027 A Huttner, S Emonet, S Harbarth, G Renzi, L Kaiser, J Schrenzel. Polymerase-chain reaction/elec  
25542729 D Hayes, TJ Preston, M Galantowicz, JD Tobias, CR Long, G Peri. Improving accessibility to lung  
25587703 C O'Leary, JL Gilbert, S O'Dea, FJ O'Brien, SA Cryan. Respiratory Tissue Engineering: Current Stat  
25620082 SC Sweet, TG Liou. Adolescents with cystic fibrosis: take the door, not the window.. Pediatric t  
25626342 M Valapour, MA Skeans, BM Heubner, JM Smith, MI Hertz, LB Edwards, WS Cherikh, ER Callahar  
25634636 R Colman, LG Singer, R Barua, J Downar. Outcomes of lung transplant candidates referred for c  
25655532 SD Aaron, AL Stephenson, DW Cameron, GA Whitmore. A statistical model to predict one-year  
25658565 JL Rodriguez-Tudela, A Alastruey-Izquierdo, S Gago, M Cuenca-Estrella, C León, JM Miro, A Nuñe  
25727653 H Morisse Pradier, A Sénéchal, F Philit, F Tronc, JM Maury, R Grima, C Flamens, S Paulus, J Neid  
25739865 ER Valsangiacomo Buechel, L Grosse-Wortmann, S Fratz, J Eichhorn, S Sarikouch, GF Greil, P Be  
25750676 SH Kang, Pde T Dalcin, OB Piltcher, Rde O Migliavacca. Chronic rhinosinusitis and nasal polypo  
25757139 D Stacey, KL Vandemheen, R Hennessey, T Gooyers, E Gaudet, R Mallick, J Salgado, A Freitag, Y B  
25809545 CA Merlo, SC Clark, GJ Arnaoutakis, N Yonan, D Thomas, A Simon, R Thompson, H Thomas, J Ore  
25813769 VK Singh, M Patricia George, CJ Gries. Pulmonary hypertension is associated with increased po  
25816969 T Khuu, M Cadeiras, N Wisniewski, EF Reed, MC Deng. Reduced HLA Class II antibody response t  
25826595 JP Lynch, DM Sayah, JA Belperio, SS Weigt. Lung transplantation for cystic fibrosis: results, ind  
25855877 MD Sadler, P Crotty, L Fatovich, S Wilson, HR Rabin, RP Myers. Noninvasive methods, includin  
25856407 LJ Lobo, Z Tulu, RM Aris, PG Noone. Pan-Resistant Achromobacter xylosoxidans and Stenotrop  
25877792 RJ Shah, JM Diamond, E Cantu, J Flesch, JC Lee, DJ Lederer, VN Lama, J Orens, A Weinacker, DS \\\  
25913825 LP Ong, E Thompson, A Sachdeva, BC Ramesh, H Muse, K Wallace, G Parry, SC Clark. Allogeneic  
25959679 A Roux, L Beaumont-Azuar, AM Hamid, S De Miranda, D Grenet, G Briend, P Bonnette, P Puyo, F  
25980570 BM Hoffman, GL Stonerock, PJ Smith, CV O'Hayer, S Palmer, RD Davis, K Kurita, RM Carney, K Fr  
25985438 CA Austin, D Mohottige, RL Sudore, AK Smith, LC Hanson. Tools to Promote Shared Decision M  
25989360 J Di Cristofaro, M Reynaud-Gaubert, F Carlini, P Roubertoux, A Loundou, A Basire, C Frassati, P  
25991453 J Abbott, AM Morton, MA Hurley, SP Conway. Longitudinal impact of demographic and clinica  
26003078 B Kubisa, M Piotrowska, J Milczewska, M Bielewicz, J Pieróg, A Kozak, M Czarnecka, N Wójcik, P



26053185 MS Schechter, D Trueman, R Farquharson, K Higuchi, CL Daines. Inhaled aztreonam lysine versus  
26070598 S Biswas Roy, D Alarcon, R Walia, KM Chapple, RM Bremner, MA Smith. Is There an Age Limit to  
26087666 AL Stephenson, J Sykes, Y Berthiaume, LG Singer, SD Aaron, GA Whitmore, S Stanojevic. Clinica  
26138770 D Hayes, S Kirkby, BA Whitson, SM Black, SI Sheikh, JD Tobias, HM Mansour, BT Kopp. Mortality  
26140799 JS Jolissaint, DP Mulloy, JC Swanson, DP Albon, CL Lau. Bilateral Lung Transplantation From a  
26154550 JE Afonso Júnior, Ede C Werebe, RM Carraro, RH Teixeira, LM Fernandes, LG Abdalla, MN Saman  
26160169 F Di Lorenzo, Ł Kubik, A Oblak, NI Lorè, C Cigana, R Lanzetta, M Parrilli, MA Hamad, A De Souza, .  
26164650 PG Sanchez, K Rajagopal, SM Pham, BP Griffith. Defining quality during ex vivo lung perfusion:  
26169665 KJ Ramos, CH Goss. Remarkable long-term survival post-lung transplantation among Canadian  
26176522 EM Hojaij, BW Romano, AN Costa, JE Afonso Junior, PC Camargo, RM Carraro, SV Campos, MN S  
26208890 D Hayes, AV Patel, SM Black, KS McCoy, S Kirkby, JD Tobias, HM Mansour, BA Whitson. Influenza  
26212659 AT Braun, EC Dasenbrook, AS Shah, JB Orens, CA Merlo. Impact of lung allocation score on surv  
26216722 D Bennett, A Fossi, E Bargagli, RM Refini, M Pieroni, L Luzzi, C Ghiribelli, P Paladini, L Voltolini,  
26229558 K Chaikriangkrai, HY Jhun, EA Graviss, S Jyothula. Overweight-mortality paradox and impact of  
26242840 V Vasanthan, J Nagendran. Compliance trumps oxygenation: Predicting quality with ex vivo lu  
26260498 TN Machuca, M de Perrot. Mechanical Support for the Failing Right Ventricle in Patients With  
26308302 I Inci, S Klinzing, D Schneider, RA Schuepbach, P Kestenholz, S Hillinger, C Benden, M Maggiorin  
26362396 EP Dellon, E Chen, J Goggin, K Homa, BC Marshall, KA Sabadosa, RI Cohen. Advance care planni  
26366639 PJ Smith, JA Blumenthal, EP Trulock, KE Freedland, RM Carney, RD Davis, BM Hoffman, SM Paln  
26391389 C Martin, C Hamard, R Kanaan, V Boussaud, D Grenet, M Abély, D Hubert, A Munck, L Lemonnie  
26397415 R Scarsini, MA Prioli, EG Milano, C Castellani, G Pesarini, BM Assael, C Vassanelli, FL Ribichini. F  
26414151 D Hayes, JJ Auletta, BA Whitson, SM Black, S Kirkby, JD Tobias, HM Mansour. Human leukocyte  
26429328 N Chin, M Paraskeva, E Paul, L Cantwell, B Levvey, T Williams, G Snell, G Westall. Comparative  
26429393 D Hayes, BT Kopp, JD Tobias, FW Woodley, HM Mansour, D Tumin, SE Kirkby. Survival in Patien  
26453627 JS Elborn, SC Bell, SL Madge, PR Burgel, C Castellani, S Conway, K De Rijcke, B Dembski, P Drevir  
26453758 M Diciolla, G Binetti, T Di Noia, F Pesce, FP Schena, AM Vågane, R Bjørneklett, H Suzuki, Y Tomir  
26516673 M Laging, JA Kal-van Gestel, J van de Wetering, JN IJzermans, MG Betjes, W Weimar, JI Roodnat  
26530270 P Moreno, A Alvarez, G Carrasco, J Redel, HD Guaman, C Baamonde, FJ Algar, F Cerezo, A Salvati  
26559561 IJ Saldanha, O Akinyede, KA Robinson. Immunosuppressive drug therapy for preventing rejecti  
26602912 SM Black, FW Woodley, D Tumin, K Mumtaz, BA Whitson, JD Tobias, D Hayes. Cystic Fibrosis As  
26620538 R Miyoshi, TF Chen-Yoshikawa, K Hijiya, H Motoyama, A Aoyama, T Menju, T Sato, M Sonobe, H  
26643672 BT Kopp, J Groner, JD Tobias, BA Whitson, S Kirkby, D Hayes. Cigarette Smoking Effect on Survi  
26657575 J Pritchard, MV Thakrar, R Somayaji, MG Surette, HR Rabin, D Helmersen, D Lien, S Purighalla, E  
26680084 HJ Lee, Y Hwang, HY Hwang, IK Park, CH Kang, YW Kim, YT Kim. Use of Extracorporeal Membran  
26687141 D Hayes, D Tumin, CJ Daniels, KS McCoy, HM Mansour, JD Tobias, SE Kirkby. Pulmonary Artery  
26694514 JG Luc, J Nagendran. The evolving potential for pediatric ex vivo lung perfusion.. Pediatric tran  
26698308 G Belle-van Meerkerk, PA de Jong, HW de Valk, T Neefjes, FA Pameijer, JM Kwakkel-van Erp, EA v  
26704622 KJ Ramos, BS Quon, KJ Psoter, ED Lease, N Mayer-Hamblett, ML Aitken, CH Goss. Predictors of r  
26711802 DJ Smith, KA Ramsay, ST Yerkovich, DW Reid, CE Wainwright, K Grimwood, SC Bell, TJ Kidd. Ps  
26715773 JS Flores, PM Rovedder, B Ziegler, AF Pinotti, SS Barreto, Pde T Dalcin. Clinical Outcomes and P  
26718747 F Calabrese, F Lunardi, N Nannini, E Balestro, M Loy, G Marulli, F Calabrese, SE Vuljan, M Schiav  
26752394 MM Eves, BS Esplin. "She Just Doesn't Know Him Like We Do": Illuminating Complexities in Sur  
26757299 GM de Boer, L van Dussen, LM van den Toorn, MA den Bakker, RA Hoek, DA Hesselink, CE Hollak,  
26782769 D Tumin, RE Foraker, JD Tobias, D Hayes. No survival benefit to gaining private health insuranc  
26785965 PC Camargo, RH Teixeira, RM Carraro, SV Campos, JE Afonso Junior, AN Costa, LM Fernandes, LC  
26799652 DJ Klionsky, K Abdelmohsen, A Abe, MJ Abedin, H Abeliovich, A Acevedo Arozena, H Adachi, CM  
26857774 MR Morrell, JM Pilewski. Lung Transplantation for Cystic Fibrosis.. Clinics in chest medicine. 2  
26885432 H Wilkens, M Sester. Treatment of Cytomegalovirus Infection with Cidofovir and CMV Immune

26899390 FJ Herth, A Valipour, PL Shah, R Eberhardt, C Grah, J Egan, JH Ficker, M Wagner, C Witt, U Liebe  
26923867 OE Beard, A Freifeld, MG Ison, SJ Lawrence, N Theodoropoulos, NM Clark, RR Razonable, G Alar  
26932810 D Hayes, D Tumin, JD Tobias. Pre-transplant Panel Reactive Antibody and Survival in Adult Cyst  
26936529 YJ Chen, W Ning, AK Gupta. Empirical likelihood based detection procedure for change point i  
26948697 M Metzger, MK Song, S Ward, PP Chang, LC Hanson, FC Lin. A randomized controlled pilot trial  
26957452 KJ Overby, JJ Fins. Organ Transplantation for Individuals with Neurodevelopmental Disorders.  
26971246 C Oliveira, A Sole, RM Girón, E Quintana-Gallego, P Mondejar, F Baranda, A Alvarez, C Prados, J R  
26989822 M Maeurer, M Rao, A Zumla. Host-directed therapies for antimicrobial resistant respiratory tra  
27011912 N Patel, A Cook, E Greenhalgh, MA Rech, J Rusinak, L Heinrich. Overview of extended release ta  
27021279 A Solé, I Pérez, I Vázquez, A Pastor, J Escrivá, G Sales, D Hervás, AR Glanville, AL Quittner. Patien  
27026415 P Tomei, V Masola, S Granata, G Bellin, P Carratù, M Ficial, VA Ventura, M Onisto, O Resta, G Ga  
27037837 LJ Ceulemans, S Strypstein, A Neyrinck, S Verleden, D Ruttens, D Monbaliu, P De Leyn, J Vanhae  
27051622 TS Panchabhai, D Bandyopadhyay, A Kapoor, O Akindipe, C Lane, S Krishnan. Acute ischemic of  
27052747 M Fakhro, R Ingemansson, I Skog, L Algotsson, L Hansson, B Koul, R Gustafsson, P Wierup, S Linc  
27062884 SD Aaron, C Chaparro. Referral to lung transplantation--too little, too late.. Journal of cystic fil  
27091109 AR Whiddon, KL Dawson, A Fuentes, KK Perez, LE Peterson, T Kaleekal. Postoperative antimicroc  
27109963 L Rosso, A Palleschi, D Tosi, P Mendogni, I Righi, R Carrinola, M Montoli, F Damarco, V Rossetti,  
27126691 P Dilokthornsakul, RN Hansen, JD Campbell. Forecasting US ivacaftor outcomes and cost in cys  
27129023 D Hayes, D Tumin, BT Kopp, JD Tobias, SI Sheikh, SE Kirkby. Influence of graft ischemic time on  
27148506 S Leibel, M Post. Endogenous and Exogenous Stem/Progenitor Cells in the Lung and Their Role  
27198469 LJ Estcourt, PM Fortin, S Hopewell, M Trivella, IR Hambleton, G Cho. Regular long-term red blc  
27215505 J Rademacher, FC Ringshausen, H Suhling, J Fuge, G Marsch, G Warnecke, A Haverich, T Welte, J  
27219817 D Vilozni, M Lavie, M Ofek, I Sarouk, BE Bar-Aluma, A Dagan, M Ashkenazi, MJ Segel, O Efrati. Co  
27220108 T Klikovits, C Lambers, B Ghanim, B Dome, G Murakoezy, S Zöchbauer-Müller, R Waseda, C Aign  
27257737 L Arunachalam, IA Hunter, S Killeen. Reporting of Randomized Controlled Trials With Statistic  
27271740 F Minandri, F Imperi, E Frangipani, C Bonchi, D Visaggio, M Facchini, P Pasquali, A Bragonzi, P V  
27272653 D Hayes, BT Kopp, SE Kirkby, SD Reynolds, HM Mansour, JD Tobias, D Tumin. Impact of Donor /  
27291389 A Amato, L Ferrigno, M Salvatore, V Toccaceli, . [Italian Cystic Fibrosis Register - Report 2010].  
27296835 D Hayes, AR Glanville, D McGiffin, JD Tobias, D Tumin. Age-related survival disparity associated  
27316381 JW Awori Hayanga, JK Aboagye, N Shigemura, HK Hayanga, E Murphy, A Khaghani, J D'Cunha. A  
27321167 JT Magruder, TC Crawford, JC Grimm, B Kim, AS Shah, EL Bush, RS Higgins, CA Merlo. Risk Facto  
27375092 HK Bayes, ND Ritchie, C Ward, PA Corris, M Brodlie, TJ Evans. IL-22 exacerbates weight loss in a  
27469016 D Raghavan, A Gao, C Ahn, V Kaza, J Finklea, F Torres, R Jain. Lung transplantation and gender e  
27469604 S Madge, SC Bell, PR Burgel, K De Rijcke, F Blasi, JS Elborn, . Limitations to providing adult cyst  
27487912 AC Spicer, CS Calfee, MS Zinter, RG Khemani, VP Lo, MF Alkhouli, BE Orwoll, AL Graciano, JP Bo  
27492519 S Sithamparanathan, L Thirugnanasothy, S Clark, JH Dark, AJ Fisher, KF Gould, A Hasan, JL Lord  
27510183 K Krivchenia, D Tumin, JD Tobias, D Hayes. Increased Mortality in Adult Cystic Fibrosis Patients  
27516225 MJ McDonnell, S Aliberti, PC Goeminne, K Dimakou, SC Zucchetti, J Davidson, C Ward, JG Laffe  
27522311 C Keating, AD Poor, X Liu, C Chiuzan, D Backenroth, Y Zhang, E DiMango. Reduced survival in ac  
27559681 SK Cribbs, JM Beck. Microbiome in the pathogenesis of cystic fibrosis and lung transplant-relat  
27576234 LL Pritchard. Respiratory Conditions Update: Cystic Fibrosis.. FP essentials. 2016. 448:#pages  
27598492 F Funes Díaz, V Gaete Pinto. [Risk behaviors among adolescents with complex diseases].. Revist  
27682327 R Somayaji, JC Lam, MG Surette, B Waddell, HR Rabin, CD Sibley, S Purighalla, MD Parkins. Lon  
27719829 JA Town, ML Aitken. Deaths Related to Bronchial Arterial Embolization in Patients With Cystic  
27729035 K Rajala, JT Lehto, M Saarinen, E Sutinen, T Saarto, M Myllärniemi. End-of-life care of patients w  
27743767 V Santos, AV Cardoso, C Lopes, P Azevedo, F Gamboa, A Amorim. Cystic fibrosis - Comparison b  
27773453 Y Liu, M Vela, T Rudakevych, C Wigfield, E Garrity, MR Saunders. Patient factors associated with  
27779905 DM Vock, MT Durham, WM Tsuang, CA Finlen Copeland, AA Tsiatis, M Davidian, ML Neely, DJ L

27794529 A De Soyza, S Aliberti. Bronchiectasis and Aspergillus: How are they linked?. *Medical mycology*

27805520 E Küpeli, B Er Dedekarginoğlu, G Ulubay, M Haberal. Association Between Preoperative Pulmor

27833495 M Piazza, G Martucci, A Arcadipane. Postoperative pain management of liver transplantation i

27842444 C Chaparro, S Keshavjee. Lung transplantation for cystic fibrosis: an update.. *Expert review of r*

27864036 MJ McDonnell, S Aliberti, PC Goeminne, MI Restrepo, S Finch, A Pesci, LJ Dupont, TC Fardon, R

28009031 K Chatterjee, A Goyal, N Shah, K Kakker, R Jagana, P Anderson. Contemporary national trends

28046024 Y Tong, JK Udupa, DA Torigian, D Odhner, C Wu, G Pednekar, S Palmer, A Rozenshtein, MA Shirk

28088585 D Haussaire, PE Fournier, K Djiguiba, V Moal, T Legris, R Purgus, J Bismuth, X Elharrar, M Reynau

28090331 H Heinrich, A Neuenschwander, S Russmann, B Misselwitz, C Benden, MM Schuurmans. Preval

28094851 LJ Estcourt, PM Fortin, S Hopewell, M Trivella, WC Wang. Blood transfusion for preventing prii

28103851 KJ Ramos, R Somayaji, ED Lease, CH Goss, ML Aitken. Cystic fibrosis physicians' perspectives on

28115168 KJ Ramos, BS Quon, SL Heltshe, N Mayer-Hamblett, ED Lease, ML Aitken, NS Weiss, CH Goss. He

28132082 MA Sikma, CC Hunault, EA van de Graaf, MC Verhaar, J Kesecioglu, DW de Lange, J Meulenbelt.

28184305 M Mantero, A Gramegna, G Pizzamiglio, A D'Adda, P Tarsia, F Blasi. Once daily aerosolised tobr

28231895 M Murriss-Espin, A Le Borgne, G Vignal, L Tetu, A Didier. [Adolescents with cystic fibrosis: the ap

28260470 E Kupeli, B Er Dedekarginoglu, G Ulubay, F Oner Eyuboglu, M Haberal. American Society of Ane

28267234 AL Stephenson, J Sykes, Y Berthiaume, LG Singer, C Chaparro, SD Aaron, GA Whitmore, S Stanoj

28275225 MP Hilty, T Riva, SR Cottini, EM Kleinert, A Maggiorini, M Maggiorini. Low flow veno-venous ex

28288488 AL Stephenson, J Sykes, S Stanojevic, BS Quon, BC Marshall, K Petren, J Ostrenga, AK Fink, A Elb

28330773 L Nkam, J Lambert, A Latouche, G Bellis, PR Burgel, MN Hocine. A 3-year prognostic score for a

28337719 P Tappenden, S Sadler, M Wildman. An Early Health Economic Analysis of the Potential Cost Eff

28364392 L Fila, P Dřevínek. Burkholderia cepacia complex in cystic fibrosis in the post-epidemic period:

28364441 M Gilljam, U Nyström, G Dellgren, I Skog, L Hansson. Survival after lung transplantation for cys

28386760 RJ Shah, F Boin. Lung Transplantation in Patients With Systemic Sclerosis.. *Current rheumatol*

28406714 R Somayaji, S Stanojevic, DE Tullis, AL Stephenson, F Ratjen, V Waters. *Clinical Outcomes Assoc*

28408704 JA Ponto. Changes in Patterns of Tc-Macroaggregated Albumin Use Between 2000 and 2015.. *J*

28422188 M Codagnone, E Cianci, A Lamolinara, VC Mari, A Nespoli, E Isopi, D Mattoscio, M Arita, A Bragc

28445614 RM Cornely, B Schlingmann, WS Shepherd, JD Chandler, DC Neujahr, M Koval. Two common h

28456611 EM Lowery, W Adams, SA Grim, NM Clark, L Edwards, JE Layden. Increased risk of PTLD in lung t

28457371 P Mendogni, A Palleschi, D Tosi, I Righi, M Montoli, F Damarco, LC Morlacchi, L Santambrogio,

28457372 A Palleschi, P Mendogni, D Tosi, M Montoli, R Carrinola, AV Mariolo, F Briganti, M Nosotti. *Lur*

28514567 N Klomjit, A Mehrnia, M Sampaio, S Bunnapradist. Impact of Diabetes Mellitus on Survival Out

28532459 JJ Mooney, K Raimundo, E Chang, MS Broder. Mechanical ventilation in idiopathic pulmonary

28554722 R Somayaji, KJ Ramos, SG Kapnadak, ML Aitken, CH Goss. Common clinical features of CF (respi

28576398 GW Canonica, F Blasi, N Scichilone, L Simoni, A Zullo, C Giovannetti, C Briguglio, S Barsanti, R A

28618155 P Parize, V Boussaud, V Poinignon, E Sitterlé, F Botterel, S Lefeuvre, R Guillemain, E Dannaoui,

28651906 JE Kao, JM Zirbes, CK Conrad, CE Milla. Lung clearance index is sensitive to small airway disease

28662114 VP Narayanaswamy, S Giatpaiboon, SM Baker, WP Wiesmann, JJ LiPuma, SM Townsend. Novel

28711221 G Snell, A Reed, M Stern, D Hadjiliadis. The evolution of lung transplantation for cystic fibrosis:

28757079 SG Kapnadak, GA Kicska, KJ Ramos, DA Marshall, TY Carroll, SN Pipavath, MS Mulligan, CH Goss,

28797492 CC Kennedy, RR Razonable. *Fungal Infections After Lung Transplantation.. Clinics in chest medi*

28822537 TC Crawford, JT Magruder, JC Grimm, A Suarez-Pierre, X Zhou, JS Ha, RS Higgins, SR Broderick, J

28837442 IP van de Peppel, A Bertolini, JW Jonker, FAJA Bodewes, HJ Verkade. Diagnosis, follow-up and t

28871606 E Ammerman, SC Sweet, M Fenchel, GA Storch, C Conrad, D Hayes, A Faro, S Goldfarb, E Melicof

28886227 H Levine, D Prais, Y Raviv, V Rusanov, D Rosengarten, M Saute, M Hoshen, H Mussaffi, H Blau, M

28916014 C Samsel, M Ribeiro, P Ibeziako, DR DeMaso. Integrated Behavioral Health Care in Pediatric Su

28917611 E Chen, K Homa, J Goggin, KA Sبادosa, S Hempstead, BC Marshall, A Faro, EP Dellon. End-of-li

28964476 R Bryant, D Morales, M Schechter. Pediatric lung transplantation.. *Seminars in pediatric surgery*

28994224 Q Reynaud, D Dupont, R Nove-Josserand, S Durupt, F Persat, F Ader, D Grenet, I Durieu. Rare an  
29086331 A Benezech, N Desmazes-Dufeu, K Baumstarck, M Bouvier, B Coltey, M Reynaud-Gaubert, V Vitt  
29130541 PJ Smith, LD Snyder, SM Palmer, BM Hoffman, GL Stonerock, KK Ingle, CK Saulino, JA Blumenth  
29221320 G Loor, L Simpson, A Parulekar. Bridging to lung transplantation with extracorporeal circulatc  
29239766 H Corvol, N Rousselet, KE Thompson, L Berdah, G Cottin, T Foussigniere, E Longchamp, L Fiette  
29241892 P Dilokthornsakul, M Patidar, JD Campbell. Forecasting the Long-Term Clinical and Economic  
29255353 F Froes, N Roche, F Blasi. Pneumococcal vaccination and chronic respiratory diseases.. Interna  
29531748 KO Lindell, M Nouraie, MJ Klesen, S Klein, KF Gibson, DJ Kass, MQ Rosenzweig. Randomised cli  
29773296 K Tachibana, Y Okada, Y Matsuda, K Miyoshi, T Oto, TF Chen-Yoshikawa, H Date, M Minami, M O

tic fibrosis.. The New England journal of medicine. 1992. 326:#pages#

is International Lung Transplant Registry.. Clinical transplants. 1992. :#pages#

ation in the paediatric age group. The Hannover experience.. European journal of pediatrics. 1992. 151 Sup

results of heart-lung transplantation for cystic fibrosis.. Lancet (London, England). 1992. 339:#pages#

yte control of HLA-DR blood monocyte differentiation into neo-fibroblasts. Further evidence of pluripotent

l single lung transplantation. Complications and results in 14 patients.. European journal of cardio-thoraci

ge children with end-stage liver disease.. Journal of developmental and behavioral pediatrics : JDBP. 1992.

lung transplantation for septic lung disease: surgical and physiologic advantages over heart-lung transplan

pages#

92. 7:#pages#

perative assessment and postoperative management.. The European respiratory journal. 1992. 5:#pages#

Archives of internal medicine. 1992. 152:#pages#

of heart and lung transplantation : the official publication of the International Society for Heart Transplant

owski, BR Wilcox. Isolated lung transplantation for end-stage lung disease: a viable therapy.. The Annals of t

Target population for lung transplantation in North America in the 1990s.. The Journal of thoracic and card

lung transplantation for cystic fibrosis. The Cystic Fibrosis Transplant Study Group.. The Annals of thoracic

i6:#pages#

ntation for cystic fibrosis. The Toronto Lung Transplant Group.. The Journal of thoracic and cardiovascular

Carolina medical journal. 1991. 52:#pages#

s.. Annals of the Academy of Medicine, Singapore. 1991. 20:#pages#

ical reviews in allergy. . 9:#pages#

ity-Barnes Hospital experience with lung transplantation. Washington University Lung Transplantation Gro

nsplantation: the procedure of choice for double-lung replacement.. The Annals of thoracic surgery. 1991.

plantation. The importance of the area under the curve.. Chest. 1991. 100:#pages#

; M Elliott, M de Leval. Heart-lung transplantation for cystic fibrosis. 2: Outcome.. Archives of disease in chi

, T Higenbottam. Heart and lung transplantation for terminal cystic fibrosis. A 4 1/2-year experience.. The J

plantation for cystic fibrosis.. Thorax. 1991. 46:#pages#

antation in infants, children, and adolescents.. Journal of pediatric surgery. 1991. 26:#pages#

rgery. 1990. 212:#pages#

on. Heart-lung transplantation for cystic fibrosis and subsequent domino heart transplantation.. The Journ

ung transplantation.. The Journal of heart transplantation. . 9:#pages#

a new challenge for cardiothoracic surgery.. European journal of cardio-thoracic surgery : official journal of

tion for end-stage lung disease. The Bordeaux Lung and Heart-Lung Transplant Group.. European journal of

0:#pages#

minary experience.. Canadian Association of Radiologists journal = Journal l'Association canadienne des rad

od].. Monatsschrift Kinderheilkunde : Organ der Deutschen Gesellschaft fur Kinderheilkunde. 1986. 134:#

ransplants. 1988. :#pages#

CI Amrein, A Guinvarch. Combined lung and liver transplantation in patients with cystic fibrosis. A 4 1/2-ye

transplantation. A pilot study. University of Washington Medical Center Lung Transplant Study Group.. Che

transplantation for mechanically ventilated patients.. The Journal of heart and lung transplantation : the oi

lications of lung transplantation. Impact of cystic fibrosis.. American journal of respiratory and critical car

erman, JT Thompson, MA Weiner. Improved results of lung transplantation for patients with cystic fibrosis

in lung transplant recipients.. The Journal of thoracic and cardiovascular surgery. 1995. 110:#pages#

itates: a report from the UNOS/ISHLT Scientific Registry for Organ Transplants. United Network for Organ Sh

care. 1995. 23:#pages#

ld, J Forty. Bilateral sequential lung transplantation for end stage septic lung disease.. Thorax. 1995. 50:#

e Groningen Lung Transplantation Group.. The Netherlands journal of medicine. 1995. 46:#pages#  
affe, BP Griffith. Pediatric lung transplantation. The years 1985 to 1992 and the clinical trial of FK 506.. The  
: recipients with cystic fibrosis.. Chest. 1993. 103:#pages#  
:rics. 1993. 5:#pages#  
ssessment. 1994. :#pages#  
ig transplantation in children with cystic fibrosis.. European journal of cardio-thoracic surgery : official jour  
lant patient with cystic fibrosis.. Nutrition in clinical practice : official publication of the American Society  
rosis referrals for lung transplantation.. Chest. 1995. 107:#pages#  
ische Wochenschrift. 1995. 125:#pages#  
tric lung transplantation.. The Journal of thoracic and cardiovascular surgery. 1995. 109:#pages#  
KA Moore, BA Reitz. Long-term results of combined heart-lung transplantation: the Stanford experience.. T  
mart, HO Ventura, JC Scharfenberg. Lung transplantation in Louisiana: report of the first twenty lung transp  
  
R Pifarre. Survival and functional outcome after single and bilateral lung transplantation. Loyola Lung Tran  
ut. Isolated lung transplantation; initial experience at the University Hospitals Leuven. Leuven Lung Transp  
  
e next decade in England and Wales.. Respiratory medicine. 1994. 88:#pages#  
echniques, and early results.. The Journal of thoracic and cardiovascular surgery. 1994. 107:#pages#  
eferral for pediatric transplantation.. The Journal of heart and lung transplantation : the official publication  
ation in systemic lupus erythematosus.. Chest. 1993. 104:#pages#  
e.. Archives of internal medicine. 1993. 153:#pages#  
c fibrosis--therapeutic implications and long term follow up.. Archives of disease in childhood. 1993. 68:#  
nsplantation.. The Journal of pediatrics. 1994. 124:#pages#  
, J Wallwork. Heart-lung transplantation for end-stage respiratory disease in patients with cystic fibrosis at  
Leval. Incidence of obliterative bronchiolitis after heart-lung transplantation in children.. The Journal of h  
anding indications, 1985 to 1993.. The Journal of heart and lung transplantation : the official publication  
nd lung transplantation : the official publication of the International Society for Heart Transplantation. . 1:  
after bilateral lung transplantation. Bordeaux Lung and Heart-Lung Transplant Group.. The Annals of thorac  
ith cystic fibrosis awaiting heart and lung transplantation.. The Journal of heart and lung transplantation :  
ung transplantation.. Annals of surgery. 1993. 218:#pages#  
costeroid administration in clinical lung transplantation. The University of Toronto and Washington Unive  
ung transplantation: a North American-European experience.. The Journal of heart and lung transplantatio  
R Giudicelli, M Noirclerc. Double-lung transplantation in mechanically ventilated patients with cystic fibr  
dicts prognosis of lung transplant candidates.. Transplantation. 1993. 55:#pages#  
cystic fibrosis patients.. Journal of the Royal Society of Medicine. 1993. 86 Suppl 20:#pages#  
RS Markin, BW Shaw, AN Langnas. Clinical denouement and mutation analysis of patients with cystic fibros  
ingle-lung transplantation in children.. The Annals of thoracic surgery. 1995. 60:#pages#  
est. 1996. 109:#pages#  
ages#  
on for refractory acute rejection in heart-lung and lung allografts.. Chest. 1996. 109:#pages#  
of North America. 1996. 80:#pages#  
rgal, G Grienfeld, MR Kramer. Early experience in lung transplantation.. Israel journal of medical sciences. :  
cal and evolutive features].. Revista clinica espanola. 1996. 196:#pages#  
. Techniques for bronchial anastomosis.. The Journal of heart and lung transplantation : the official publica  
plant diagnoses in lung transplantation: a pathologic study of lungs removed for parenchymal disease.. The  
Palencia, P Algarra. [Which variables predict the appearance of right bundle-branch block and its course af  
e, J Wallwork. Heart-lung-liver transplantation.. The Journal of heart and lung transplantation : the official  
ion studies?. The Journal of heart and lung transplantation : the official publication of the International So

ystic Fibrosis Centre between 1987 and 1994.. Thorax. 1996. 51:#pages#

nsplantation: a report from the UNOS/ISHLT International Registry for Thoracic Organ Transplantation.. Clin  
arnes, AE Gimson, PJ Friend. Twenty-seven years of liver transplantation at Addenbrooke's Hospital, Cambri  
ferred in the first 4 years to a lung transplantation program. The Lung Transplantation Group of Hospital Va  
ng transplantation: intermediate-term results.. The Journal of heart and lung transplantation : the official j  
il varices in children by endoscopic variceal ligation.. Journal of pediatric surgery. 1996. 31:#pages#

work. Excellent outcome of cardiac transplantation using domino donor hearts.. European journal of cardi  
eral lobar transplantation utilizing living related donors.. Artificial organs. 1996. 20:#pages#

lung transplantation experience: intermediate results.. The Journal of thoracic and cardiovascular surgery.  
ges#

ation--are there surgical contraindications?. Transplantation. 1997. 63:#pages#

c pulmonology. 1997. 23:#pages#

ntation for patients under 10 with cystic fibrosis.. Archives of disease in childhood. 1997. 76:#pages#

lavage cells from terminal patients with cystic fibrosis.. Clinical and experimental immunology. 1997. 107  
rtation.. The Journal of heart and lung transplantation : the official publication of the International Society  
ax. 1997. 52:#pages#

America. 1996. 8:#pages#

ear experience with heart-lung transplantation for cystic fibrosis.. Transplantation proceedings. . 29:#page  
eria in cystic fibrosis patients on lung transplant outcome.. American journal of respiratory and critical car  
of heart and lung transplantation : the official publication of the International Society for Heart Transplant  
ndidates.. Clinics in chest medicine. 1997. 18:#pages#

#pages#

model for the prediction of survival in cystic fibrosis.. Thorax. 1997. 52:#pages#

P Chetham, A Dhaliwal, M Diercks, T Kinnard, K Niejadlik, M Ochs. The past, present, and future of lung tran  
atterson. Retrieval by other procurement teams provides favorable lung transplantation outcome.. The An  
nsplantation: a report from the UNOS/ISHLT International Registry for Thoracic Organ Transplantation.. Cli  
redictive validity of a modified N. Huang clinical scoring system in adult cystic fibrosis patients.. The Europ  
ion information of parents of children with cystic fibrosis.. Transplantation. 1997. 64:#pages#

t: a case report.. Clinical transplantation. 1997. 11:#pages#

llowing lung transplantation.. Chest. 1997. 112:#pages#

onary medicine. 1997. 3:#pages#

laveric organ donation.. QJM : monthly journal of the Association of Physicians. 1997. 90:#pages#

fit of lung transplantation for end-stage lung disease.. Lancet (London, England). 1998. 351:#pages#

ing-donor lobar transplantation for indications other than cystic fibrosis.. The Journal of thoracic and card  
ent.. Chest. 1998. 113:#pages#

san, JD Cooper, GA Patterson. Pediatric and adult lung transplantation for cystic fibrosis.. The Journal of th  
merican journal of the medical sciences. 1998. 315:#pages#

Lung transplantation in children]. Nederlands tijdschrift voor geneeskunde. 1997. 141:#pages#

cipients.. Gene therapy. 1998. 5:#pages#

ng transplantation.. The Journal of heart and lung transplantation : the official publication of the Internatic  
function.. Chest. 1998. 113:#pages#

ization and infections with pseudomonas in cystic fibrosis lung transplant recipients.. Chest. 1998. 113:#p  
yocarditis? A decision analytic approach.. The Journal of heart and lung transplantation : the official publi  
l lung transplantation for end-stage pulmonary disease.. Transplantation proceedings. 1998. 30:#pages#

/iganò. Risk factors for early death in patients awaiting heart-lung or lung transplantation: experience at a s  
l of pediatric gastroenterology and nutrition. 1998. 27:#pages#

ir surgery. 1998. 10:#pages#

c and cardiovascular surgery. 1998. 10:#pages#

ent and donor outcomes in living related and unrelated lobar transplantation.. Transplantation proceeding  
:ransplantation for cystic fibrosis: effective and durable therapy in a high-risk group.. The Annals of thoracic  
in lung transplant candidates.. Chest. 1998. 114:#pages#

ctic fibrosis--a single center experience over 8 years.. European journal of cardio-thoracic surgery : official jo  
ne. 1998. 19:#pages#

983). . 27:#pages#

tonelli, C Ricci, GF Coloni. Lung transplantation for cystic fibrosis.. European journal of pediatric surgery :  
ca, C Ricci. Timing and priorities for cystic fibrosis patients candidates to lung transplantation.. European j  
a predictor of survival in adults with cystic fibrosis referred for lung transplantation.. The Journal of heart a  
sease = Archivio Monaldi per le malattie del torace. 1998. 53:#pages#

nsplantation: a report from the UNOS/ISHLT International Registry for thoracic organ transplantation.. Clin  
esponse set on the MMPI.. Assessment. 1999. 6:#pages#

gh blood cyclosporine concentration-controlled trial to compare the pharmacodynamics of Sandimmune a  
ous talc granulomatosis following single lung transplantation.. Canadian respiratory journal. . 5:#pages#

skrift for den Norske laegeforening : tidsskrift for praktisk medicin, ny raeke. 1999. 119:#pages#

asis on FEV1 may adversely affect overall survival.. Chest. 1999. 115:#pages#

ages#

ctic fibrosis.. Clinical nutrition (Edinburgh, Scotland). 1998. 17:#pages#

fections in pediatric lung transplantation: experience in 49 cases.. European journal of cardio-thoracic surg  
me of type of end-stage lung disease, one year after registration.. The Journal of heart and lung transplantati  
r carcinoma cells provides an experimental model in the rat that replicates the regional spreading pattern o  
ociation of mannose-binding lectin gene heterogeneity with severity of lung disease and survival in cystic fib  
postoperative period of lung transplantation. Incidence, predictive factors, prognosis and outcome. The L  
an analysis in paediatric cardiac transplant recipients.. Pediatric transplantation. 1999. 3:#pages#

ecade of experience.. Annals of surgery. 1999. 230:#pages#

nsplantation: a report from the UNOS/ISHLT International Registry for Thoracic Organ Transplantation.. Cli  
ation for cystic fibrosis.. Journal of pediatric health care : official publication of National Association of Pec  
al. Lung transplantation and life extension in children with cystic fibrosis.. Lancet (London, England). 1995

d practical considerations for referring candidates.. Current opinion in pulmonary medicine. 1999. 5:#pag  
tation--10-year experience.. European journal of cardio-thoracic surgery : official journal of the European /  
ransplant.. Scandinavian journal of medicine & science in sports. 2000. 10:#pages#

on in mouse airway obliterative bronchiolitis.. Transplantation. 2000. 69:#pages#

lmonary hemodynamics contribute to indicate priority for lung transplantation in patients with cystic fib  
t recipient.. Transplant international : official journal of the European Society for Organ Transplantation. 21  
DeBaun. High incidence of posttransplant lymphoproliferative disease in pediatric patients with cystic fibr  
of blood stream infection after lung transplantation: analysis in 176 consecutive patients.. Transplantation.  
egimens after lung transplantation.. Progress in transplantation (Aliso Viejo, Calif.). 2000. 10:#pages#

ic fibrosis.. Pediatric pulmonology. 2000. 30:#pages#

organ transplantation in children. The Sahlgrenska University Hospital experience.. Scandinavian cardiova  
s with cystic fibrosis awaiting lung transplantation.. American journal of respiratory and critical care medic  
in transplantation: a report from the UNOS/ISHLT International Registry for Thoracic Organ Transplantation  
ransplant.. The Journal of heart and lung transplantation : the official publication of the International Socie  
Stenotrophomonas maltophilia by rRNA-directed PCR.. Journal of clinical microbiology. 2000. 38:#pages#

cal nutrition (Edinburgh, Scotland). 2000. 19:#pages#

;-term mechanical ventilation : results and 1-year follow-up.. Chest. 2001. 119:#pages#



ort in transimmortalized mouse cell lines derived from the distal convoluted tubule and cortical and inner r  
verich. Flush perfusion with low potassium dextran solution improves early graft function in clinical lung t  
alysis.. *Statistics in medicine*. 2001. 20:#pages#

fibrosis.. *American journal of respiratory and critical care medicine*. 2001. 163:#pages#

hip model of cystic fibrosis.. *American journal of epidemiology*. 2001. 153:#pages#

lis, M Hutcheon, S Kesten. Infection with *Burkholderia cepacia* in cystic fibrosis: outcome following lung tr  
journal of respiratory and critical care medicine. 2001. 163:#pages#

ome in lung transplantation.. *The Journal of heart and lung transplantation : the official publication of the I*  
anced cyclosporine-itraconazole interaction with cola in lung transplant recipients.. *Clinical transplantati*  
-heart-beating donor.. *Lancet (London, England)*. 2001. 357:#pages#

lung transplantation for cystic fibrosis.. *Transplantation proceedings*. . 33:#pages#

adante, MT Aratari, M Rolla, R Cortesini, GF Coloni. Improved results with lung transplantation for cystic fi  
Blin, M Guignier, X Lerverve, C Pison. Prevalence and consequences of nutritional depletion in lung transpl  
n with cystic fibrosis.. *The European respiratory journal*. 2000. 16:#pages#

eval. The effect of prelung transplant clinical status on post-transplant survival of children with cystic fibro  
.999. 55:#pages#

:#pages#

/ and transplant effect, stratified by type of end-stage lung disease, the Eurotransplant experience.. *The Jour*  
*ournal of health care chaplaincy*. 2001. 11:#pages#

id in vitro correction of the mdx dystrophin gene nonsense mutation by short-fragment homologous replac  
esenofsky, R Jesnowski. Immortalized bovine pancreatic duct cells become tumorigenic after transfection v  
ation: a report from the UNOS/ISHLT International Registry for Thoracic Organ Transplantation.. *Clinical tra*  
h chronic lung diseases]. *Revue des maladies respiratoires*. 2001. 18:#pages#

von der Hardt. Diabetes mellitus in patients with cystic fibrosis: the impact of diabetes mellitus on pulmor  
zeinberg, H Shmilovich, G Paret, J Laufer, Y Yahav. Prediction of mortality and timing of referral for lung tra  
er, H Beanlands, SM Edworthy. Structure of lifestyle disruptions in chronic disease: a confirmatory factor an  
airflow obstruction, proliferation of abnormal smooth muscle cells, and impairment of gas exchange as pre  
Non-invasive pressure support ventilation in patients with acute respiratory failure after bilateral lung trar  
rffko. Lung transplantation for cystic fibrosis: immune system and autoimmunity.. *Medical science monitor*  
*Current opinion in pulmonary medicine*. 2001. 7:#pages#

ologic investigation on patients with cystic fibrosis subjected to bilateral lung transplantation.. *Transplant*  
*ports*. Transient colonization with *Scedosporium prolificans*. Report of four cases in Madrid.. *Mycoses*. 200  
lung transplantation among patients with cystic fibrosis.. *JAMA*. 2001. 286:#pages#

*Burkholderia cepacia* complex genomovars and pulmonary transplantation outcomes in patients with cyst  
patients with *Burkholderia cepacia* complex. Survival linked to genomovar type.. *American journal of respira*  
*ilmonary hypertension centers*.. *The Journal of heart and lung transplantation : the official publication of th*  
rtigen levels in patients who undergo lung transplantation.. *The Journal of heart and lung transplantation :*  
*N clinical issues*. 2001. 12:#pages#

ipleural adhesions on pediatric cystic fibrosis patients undergoing lung transplantation.. *The American surg*  
*th America*. 2001. 11:#pages#

ity and mortality in patients with cystic fibrosis awaiting lung transplantation.. *The Journal of heart and lur*  
*plantation by patient diagnosis*.. *The Journal of heart and lung transplantation : the official publication of*  
*ie pathophysiology of cystic fibrosis*.. *Pflugers Archiv : European journal of physiology*. 2001. 443 Suppl 1:#  
lications.. *The Indian journal of chest diseases & allied sciences*. . 44:#pages#

*World journal of surgery*. 2002. 26:#pages#

y infections. 2002. 17:#pages#

ss of lung transplantation without surveillance bronchoscopy.. *The Journal of heart and lung transplantati*  
*ble*. Coronary risk stratification in patients with end-stage lung disease.. *The Journal of heart and lung trans*

g transplantation among patients with cystic fibrosis.. JAMA. 2002. 287:#pages#  
. 287:#pages#  
Six-year molecular analysis of Burkholderia cepacia complex isolates among cystic fibrosis patients at a referal center. Jorgensen, L Holmberg. Predictors of deterioration of lung function in cystic fibrosis.. Pediatric pulmonology. 2002. 27:#pages#  
Age is a predictor of mortality in patients with cystic fibrosis awaiting lung transplantation.. American journal of respiratory and critical care medicine. 2002. 166:#pages#  
List prioritization for equitable allocation of donor lungs.. The Journal of heart and lung transplantation : the official journal of the International Society for Heart and Lung Transplantation in patients with end-stage cystic fibrosis: the Stanford experience.. The Annals of thoracic surgery. 2002. 236:#pages#  
Lung transplantation: initial intravenous mycophenolate mofetil and cyclosporine avoid cytolytic induction of rejection in children.. Annals of surgery. 2002. 236:#pages#  
Liver transplantation and therapeutic use revisited.. Hepatology (Baltimore, Md.). 2002. 36:#pages#  
Heart transplantation from live donors: the domino heart transplant.. The Journal of heart and lung transplantation : the official journal of the International Society for Heart and Lung Transplantation. 2002. 21:#pages#  
Long term results of lung transplantation for cystic fibrosis.. European journal of cardio-thoracic surgery. 2002. 22:#pages#  
Lung transplant referral criteria using predictors of 2-year mortality.. American journal of respiratory and critical care medicine. 2002. 166:#pages#  
Echocardiographic assessment of pulmonary hypertension in patients with advanced lung disease.. European journal of cardio-thoracic surgery. 2002. 22:#pages#  
[Pulmonary hypertension following heart transplantation].. Zeitschrift fur Kardiologie. 2002. 91:#pages#  
Respiratory reviews. 2000. 1:#pages#  
Heart-lung transplantation: a 17-year experience.. Transplantation. 2003. 75:#pages#  
DM, Ginns LC. An elevated breathing reserve index at the lactate threshold is a predictor of mortality in patients with end-stage lung disease awaiting transplantation and lung transplantation.. The Annals of thoracic surgery. 2003. 75:#pages#  
Respiratory reviews. 2003. 4:#pages#  
Transplant-associated coronary artery disease in heart transplants from live donors.. The Journal of heart and lung transplantation : the official journal of the International Society for Heart and Lung Transplantation. 2003. 22:#pages#  
Elevated pulmonary vascular resistance in a patient with congenital heart disease.. The Annals of thoracic surgery. 2003. 53:#pages#  
Surgical therapy for bronchiolitis obliterans syndrome: results of a pilot study.. American journal of respiratory and critical care medicine. 2003. 167:#pages#  
Lung transplantation and outcome in patients with cystic fibrosis.. The Journal of heart and lung transplantation : the official journal of the International Society for Heart and Lung Transplantation. 2003. 22:#pages#  
Fatal outcome of lung transplantation in cystic fibrosis patients due to small-colony variants of the Burkholderia cepacia complex.. Journal of the British Diabetic Association. 2003. 20:#pages#  
Lung transplantation in Slovakia--an example for successful bilateral cooperation between countries.. Bratislavské lekárske listy. 2003. 107:#pages#  
Waiting list for lung transplantation in patients with cystic fibrosis: pre-transplant recipient characteristics in patients dying of peri-operative sepsis.. The Journal of heart and lung transplantation : the official publication of the International Society for Heart and Lung Transplantation. 2003. 22:#pages#  
Tacrolimus encephalopathy.. Journal of neurology, neurosurgery, and psychiatry. 2003. 74:#pages#  
Liver transplantation in children with cystic fibrosis: a long-term longitudinal review of a single center's experience.. Journal of pediatric gastroenterology and nutrition. 2003. 47:#pages#  
Incidence and risk factors for bronchial stenosis after lung transplantation.. The Annals of thoracic surgery. 2003. 76:#pages#  
62:#pages#  
Respiratory reviews. 2003. 13:#pages#  
Lung transplantation.. The European respiratory journal. 2003. 22:#pages#  
Respiratory reviews. 2003. 13:#pages#  
Respiratory reviews. 2003. 33:#pages#  
North America. 2003. 13:#pages#  
Management strategies.. Clinical reviews in allergy & immunology. 2003. 25:#pages#  
Sinus surgery in patients with cystic fibrosis after lung transplantation: a 10-year experience.. Transplantation. 2003. 76:#pages#  
Gasche-Soccal, A Boehler, W Weder. Ten years of lung transplantation in Switzerland: results of the Swiss Lung Transplant Program.. Journal of heart and lung transplantation : the official journal of the International Society for Heart and Lung Transplantation. 2003. 22:#pages#  
Eubanks. Laparoscopic Nissen fundoplication for treating reflux in lung transplant recipients.. Journal of gastroenterology and hepatology. 2003. 18:#pages#

J Baker, RG Cohen, RM Bremner, WJ Wells, ML Barr. A decade of living lobar lung transplantation: recipient rejection in lung transplant recipients.. *Respiratory medicine*. 2004. 98:#pages#

nell. Donor history of asthma is not a contraindication to lung transplantation: 12-year single-center experience

nt bacterial pathogens on survival after lung transplantation in cystic fibrosis: results from a single large reference assessment of Platelia Aspergillus galactomannan antigen for the diagnosis of invasive aspergillosis in lung recipients, MT Aratari, E Mercadante, M Moretti, M Ibrahim. Lung transplantation for cystic fibrosis.. *Transplantation*. 2005. 80:#pages#

, S Keshavjee. Twenty-year experience of lung transplantation at a single center: Influence of recipient diagnosis on survival.. *The Journal of biological chemistry*. 2004. 279:#pages#

RA Montgomery, P Nickerson, JL Platt, H Rabb, R Thistlethwaite, D Tyan, FL Delmonico. National conference on lung transplantation--determination of the survival benefit.. *Wiener klinische Wochenschrift*. 2004. 116:#pages#

ts and timing for lung transplantation referral.. *Chest*. 2004. 126:#pages#

est. 2004. 126:#pages#

ransplant at the Favaloro Foundation: a 13-year experience.. *Transplantation proceedings*. 2005. 36:#pages#

g-term non-invasive positive pressure ventilation among cystic fibrosis patients awaiting lung transplantation.. *The Journal of heart and lung transplantation : the official publication of the International Society for Heart and Lung Transplantation*. 2005. 20:#pages#

en with cystic fibrosis".. *Journal of cystic fibrosis : official journal of the European Cystic Fibrosis Society*. 2004. 2:#pages#

riterion for lung transplantation in subjects with cystic fibrosis.. *Journal of cystic fibrosis : official journal of the European Cystic Fibrosis Society*. 2003. 2:#pages#

olescents and adults.. *Journal of cystic fibrosis : official journal of the European Cystic Fibrosis Society*. 2003. 2:#pages#

ystic fibrosis admitted to the intensive care unit.. *Journal of cystic fibrosis : official journal of the European Cystic Fibrosis Society*. 2003. 2:#pages#

after severe pulmonary exacerbation in adults with cystic fibrosis.. *American journal of respiratory and critical care medicine*. 2004. 170:#pages#

4. 24:#pages#

outcome of lung transplantation for cystic fibrosis--Danish results.. *European journal of cardio-thoracic surgery*. 2005. 28:#pages#

ion in cystic fibrosis.. *American journal of respiratory and critical care medicine*. 2005. 171:#pages#

te. Lung transplantation: a decade of experience.. *The Journal of heart and lung transplantation : the official publication of the International Society for Heart and Lung Transplantation*. 2005. 20:#pages#

onuclear infiltrate in lung allograft recipients with mild acute cellular rejection.. *The Journal of heart and lung transplantation : the official publication of the International Society for Heart and Lung Transplantation*. 2005. 20:#pages#

re nursing. 2005. 21:#pages#

plant recipient.. *Transplantation*. 2005. 79:#pages#

f real-time 3D visualization for cardiothoracic diagnostic evaluation and surgery planning.. *Journal of digital imaging*. 2005. 19:#pages#

lantation.. *Transplantation proceedings*. 2005. 37:#pages#

ung transplant recipients surviving beyond 5 years.. *Transplantation proceedings*. 2005. 37:#pages#

hageal reflux in children after lung transplantation.. *Pediatric pulmonology*. 2005. 40:#pages#

ransplantation for cystic fibrosis: 6-year follow-up.. *Journal of cystic fibrosis : official journal of the European Cystic Fibrosis Society*. 2004. 2:#pages#

oper, GA Patterson. Primary graft dysfunction and other selected complications of lung transplantation: a review of the literature.. *The Journal of heart and lung transplantation : the official publication of the International Society for Heart and Lung Transplantation*. 2005. 20:#pages#

(PTLD): a single-center experience and review of literature of PTLD in lung transplant recipients.. *The Journal of heart and lung transplantation : the official publication of the International Society for Heart and Lung Transplantation*. 2005. 20:#pages#

ng transplant recipients on the basis of home-monitoring spirometry and symptom reporting.. *Heart & Lung*. 2005. 34:#pages#

Therapeutische Umschau. *Revue therapeutique*. 2005. 62:#pages#

e medicine. 2003. 24:#pages#

and critical care medicine. 2001. 22:#pages#

or bronchiolitis obliterans syndrome following human lung transplantation.. *Immunologic research*. 2005. 32:#pages#

ymorphism of IL-10 promoter in non-small cell lung cancer.. *Lung cancer (Amsterdam, Netherlands)*. 2005. 52:#pages#

s, S Keshavjee, MA Hutcheon, LG Singer. Upper lobe fibrosis: a novel manifestation of chronic allograft dysfunction in lung transplantation.. *The Journal of heart and lung transplantation : the official publication of the International Society for Heart and Lung Transplantation*. 2005. 20:#pages#

ty of life data in lung transplant research: comparing cross sectional, repeated measures ANOVA, and multi-factorial analysis.. *The Journal of cardiovascular nursing*. 2005. 20:#pages#

Darling, S Keshavjee. Prevalence of gastroesophageal reflux in end-stage lung disease candidates for lung transplantation.. *Transplantation*. 2005. 79:#pages#

c fibrosis bronchiectasis: analysis of a 13-year experience.. The Journal of heart and lung transplantation : the official publication of the International Society for Heart and Lung Transplantation. 2005. 33:#pages#

International Lung Transplant Group: survival after single lung, double lung, and heart-lung transplantation.. Expert review of anti-infective therapy. 2006. 12:#pages#

D Elizabeth Tullis. Incidence and prevalence of diabetes mellitus in patients with cystic fibrosis undergoing lung transplantation.. American journal of respiratory and critical care medicine. 2005. 172:#pages#

Avirin is a safe and cost-effective treatment for respiratory syncytial virus infection after lung transplantation.. The Journal of heart and lung transplantation : the official publication of the International Society for Heart and Lung Transplantation. 2006. 34:#pages#

Gillus fumigatus infection with consecutive mitral valve endocarditis in a lung transplant recipient.. The Journal of heart and lung transplantation : the official publication of the International Society for Heart and Lung Transplantation. 2006. 34:#pages#

Transplant recipients protected from developing bronchiolitis obliterans syndrome?. The Annals of thoracic surgery. 2006. 82:#pages#

Forre, A Varela, A Salvatierra, L Maiz, M Hernández, J Cañón. Urgent lung transplantation in Spain.. Transplantation. 2006. 81:#pages#

Reperfusion injury and allograft dysfunction in clinical lung transplantation.. European journal of cardio-thoracic surgery. 2006. 30:#pages#

GR Bunin. Risk factors for death of patients with cystic fibrosis awaiting lung transplantation.. American journal of respiratory and critical care medicine. 2005. 172:#pages#

Monitoring adherence by lung transplant recipients.. IEEE transactions on information technology in biomedicine. 2005. 22 Suppl 1:#pages#

Respiratory care.. Respiratory care. 2006. 51:#pages#

Transplantation.. The Journal of heart and lung transplantation : the official publication of the International Society for Heart and Lung Transplantation. 2007. 35:#pages#

Colitis in four patients with cystic fibrosis following lung transplantation.. Thorax. 2007. 62:#pages#

and analysis.. Nursing research. 2006. 55:#pages#

183). 2006. 101:#pages#

Thoracic organ transplantation in the United States, 1995-2004.. American journal of transplantation : official journal of the American Society of Transplantation and the American Society of Organ Procurement. 2006. 6:#pages#

Cystic fibrosis.. Journal of cystic fibrosis : official journal of the European Cystic Fibrosis Society. 2006. 5:#pages#

Lung transplant: an Italian collaborative study.. Monaldi archives for chest disease = Archivio Monaldi per le malattie del torace. 2006. 11:#pages#

F Venuta, GF Coloni, P Pietropaoli. Extracorporeal circulation with low systemic heparinization during lung transplantation.. Medical anthropology quarterly. 2006. 20:#pages#

and new biotechnologies.. Medical anthropology quarterly. 2006. 20:#pages#

deria cepacia in a patient with cystic fibrosis.. Canadian respiratory journal. 2006. 13:#pages#

off, FJ Martinez, S Nathan, S Palmer, A Patterson, L Singer, G Snell, S Studer, JL Vachieri, AR Glanville, . International journal of transplantation medicine. 2006. 17:#pages#

and gastroenterology and nutrition. 2006. 43 Suppl 1:#pages#

akal, G Buchman, M Saute, B Vidne, MR Kramer. Lung transplantation in patients with cystic fibrosis: the Isr... 2006. 17:#pages#

opportunities.. Progress in transplantation (Aliso Viejo, Calif.). 2006. 16:#pages#

and long-term heart transplant recipients receiving metabolic inhibitors: overcoming limitations of cyclosporine.. Progress in transplantation (Aliso Viejo, Calif.). 2006. 16:#pages#

and primary medicine. 2006. 12:#pages#

and a for selection of candidates.. Seminars in respiratory and critical care medicine. 2006. 27:#pages#

and pancreatic cancer in cystic fibrosis after bilateral lung transplantation.. Pancreas. 2006. 33:#pages#

and complications after lung transplantation.. Journal of the American College of Surgeons. 2006. 203:#pages#

and for lung transplantation: fourteen years experience.. Transplantation proceedings. 2006. 38:#pages#

and Pan, JR Yankaskas. Burkholderia gladioli: five year experience in a cystic fibrosis and lung transplantation center.. American journal of respiratory and critical care medicine. 2006. 172:#pages#

and Benstein, PJ Mogayzel, X Wang, GR Cutting. Variants in mannose-binding lectin and tumour necrosis factor alpha in cystic fibrosis: today's challenges.. Progress in transplantation (Aliso Viejo, Calif.). 2006. 16:#pages#

and and young adults with cystic fibrosis.. Progress in transplantation (Aliso Viejo, Calif.). 2006. 16:#pages#

and , R Lanzetta, M Parrilli. The complete structure and pro-inflammatory activity of the lipooligosaccharide of Burkholderia gladioli.. Progress in transplantation (Aliso Viejo, Calif.). 2006. 16:#pages#

and and its impact on lung transplantation.. IEEE transactions on information technology in biomedicine. 2006. 22:#pages#

and mechanical ventilation increases short-term morbidity and mortality in pediatric patients with cystic fibrosis.. American journal of respiratory and critical care medicine. 2006. 172:#pages#

and , S Keshavjee. Impact of donors aged 60 years or more on outcome after lung transplantation: results of an international multicenter study.. American journal of transplantation : official journal of the American Society of Transplantation and the American Society of Organ Procurement. 2006. 6:#pages#

and eux, T Lerut. Risk factors for airway complications within the first year after lung transplantation.. European journal of cardio-thoracic surgery. 2006. 30:#pages#

and Gastmeier, M Strueber. Post-operative nosocomial infections after lung and heart transplantation.. The Journal of heart and lung transplantation : the official publication of the International Society for Heart and Lung Transplantation. 2006. 35:#pages#

val following lung transplantation with long-term use of bilevel positive pressure ventilation in cystic fibrosis referred for lung transplant assessment.. Journal of cystic fibrosis : official journal of the European Cystic Fibrosis Society. 2007. 131:#pages#

to lung transplantation with the extracorporeal membrane ventilator Novalung in the veno-venous mode

vent respiratory syncytial virus mortality after pediatric bone marrow transplantation: a decision analysis

urrent concepts and one center's experience.. Journal of cystic fibrosis : official journal of the European Cystic Fibrosis Society. 2007. 131:#pages#

ry bypass for lung transplantation in cystic fibrosis: pilot evaluation of perioperative outcome.. Journal of transplantation. Chest. 2007. 131:#pages#

ity and efficacy of prolonged cytomegalovirus prophylaxis with intravenous ganciclovir in pediatric and young adult lung transplant recipients.. American journal of transplantation : official journal of the American Society of Transplantation and the American Society of Transplant Surgeons. 2007. 7:#pages#

mbly and efficacy of prolonged cytomegalovirus prophylaxis with intravenous ganciclovir in pediatric and young adult lung transplant recipients: analysis of the Extracorporeal Membrane Oxygenation Study.. American journal of transplantation : official journal of the American Society of Transplantation and the American Society of Transplant Surgeons. 2007. 7:#pages#

The effect of recipient's age on lung transplant outcome.. American journal of transplantation : official journal of the American Society of Transplantation and the American Society of Transplant Surgeons. 2007. 7:#pages#

Clinics in chest medicine. 2007. 28:#pages#

g. [Pulmonary mucormycosis: difficulties in diagnosis and treatment].. Revue des maladies respiratoires. 2007. 14:#pages#

xygenator as a bridge to successful surgical repair of bronchopleural fistula following bilateral sequential lung transplantation.. Transplantation. 2007. 84:#pages#

for bronchiolitis obliterans in pediatric liver-lung transplant recipients with cystic fibrosis.. Transplantation. 2007. 84:#pages#

ary graft dysfunction after lung transplantation.. The Annals of thoracic surgery. 2007. 84:#pages#

oni. Improved results with lung transplantation for cystic fibrosis: a 6-year experience.. Interactive cardiovascular medicine. 2007. 12:#pages#

SM Palmer, S Keshavjee. Survival of lung transplant patients with cystic fibrosis harboring panresistant bacteria.. The Medical journal of Australia. 2007. 187:#pages#

ons in cystic fibrosis and non-cystic fibrosis patients after lung transplantation.. The Journal of heart and lung transplantation. 2007. 26:#pages#

red for patients with isolated adrenal metastasis of non-small cell lung carcinoma?]. Presse medicale (Paris, France). 2007. 136:#pages#

l Tvede. Aspergillus infection in lung transplant patients: incidence and prognosis.. European journal of clinical microbiology and infectious diseases. 2007. 26:#pages#

nated infection due to mycobacterium abscessus in a lung transplant patient: subcutaneous nodule as first presentation.. American journal of respiratory and critical care medicine. 2007. 175:#pages#

utrition in clinical practice : official publication of the American Society for Parenteral and Enteral Nutrition. 2007. 39:#pages#

2007. 100 Suppl 47:#pages#

ial needs of patients and support persons.. Progress in transplantation (Aliso Viejo, Calif.). 2007. 17:#pages#

ander. Cystic fibrosis liver disease: to transplant or not to transplant?. American journal of transplantation : official journal of the American Society of Transplantation and the American Society of Transplant Surgeons. 2007. 7:#pages#

medical weekly. 2007. 137:#pages#

fibrosis.. The New England journal of medicine. 2007. 357:#pages#

d journal of medicine. 2007. 357:#pages#

ts with cystic fibrosis and the effect of ursodeoxycholic acid.. Liver international : official journal of the International Liver Foundation. 2007. 17:#pages#

lmonary hemodynamics as predictors of mortality in patients awaiting lung transplantation.. Transplant international. 2007. 20:#pages#

practice. Supplement. 2007. :#pages#

landall, MF Levy, RM Goldstein, GB Klintmalm. Liver transplantation for cystic fibrosis in adults.. Surgery for children and adolescents. 2007. 17:#pages#

Shen, TM Daniel, DR Jones. The impact of the lung allocation score on short-term transplantation outcome in children with cystic fibrosis.. International journal of cardiology. 2009. 133:#pages#

on : official journal of the American Society of Transplantation and the American Society of Transplant Surgeons. 2009. 9:#pages#

ransplantation and survival in children with cystic fibrosis: solid statistics--flawed interpretation.. Pediatrics. 2008. 122:#pages#

r lung transplantation of cystic fibrosis patients infected with Burkholderia cepacia complex.. American journal of respiratory and critical care medicine. 2008. 178:#pages#

n childhood. 2008. 93:#pages#

enoir, JJ Robert. Glucose tolerance and insulin secretion, morbidity, and death in patients with cystic fibrosis.. American journal of respiratory and critical care medicine. 2008. 178:#pages#

ns, T Welte, A Haverich, J Klempnauer, B Nashan, M Strueber. Indications for and outcomes after combined liver and lung transplantation in recipient with cystic fibrosis.. Transplantation proceedings. 2008. 40:#pages#

therapy in its adolescence.. Seminars in thoracic and cardiovascular surgery. Pediatric cardiac surgery annual meeting. 2008. 10:#pages#

me following lung transplantation in patients with cystic fibrosis colonised with Burkholderia cepacia complex.. American journal of respiratory and critical care medicine. 2008. 178:#pages#

fibrosis.. The New England journal of medicine. 2008. 358:#pages#

journal of medicine. 2008. 358:#pages#

sis.. The New England journal of medicine. 2008. 358:#pages#

view from Europe.. American journal of respiratory and critical care medicine. 2008. 177:#pages#

S Schueler, AJ Fisher, JH Dark, FK Gould, PA Corris. Outcomes of lung transplantation for cystic fibrosis in a  
Elidemir, S Goldfarb, GB Mallory, MG Michaels, P Michelson, PJ Mogayzel, D Parakininkas, M Solomon, G Vi:  
plantation in cystic fibrosis.. American journal of respiratory and critical care medicine. 2008. 178:#page  
Keefe, RM Carney, I Csik, KE Freedland, JA Blumenthal. Coping and quality of life in patients awaiting lung tr  
2008. 63:#pages#

with cystic fibrosis.. The New England journal of medicine. 2008. 359:#pages#

Rolla, F Pugliese, V Liparulo, M Di Stasio, C Ricella, S Tsagkaropoulos, G Ferretti, GF Coloni. Lung transplanta  
i, M Rolla, . Lung transplantation for cystic fibrosis in Italy.. Transplantation proceedings. . 40:#pages#

es for end-of-life treatments in patients with advanced heart failure.. The Journal of heart and lung transpla  
ages directly contribute to the exaggerated inflammatory response in cystic fibrosis transmembrane condu  
sis: do they predict death or transplantation.. Pediatric pulmonology. 2008. 43:#pages#

ent opinion in pulmonary medicine. 2008. 14:#pages#

35:#pages#

ance, management and clinical outcomes of patients with airway complications following lung transplantati  
1 after lung transplantation.. The Journal of heart and lung transplantation : the official publication of the I  
redict survival in adults with cystic fibrosis?. American journal of respiratory and critical care medicine. 200  
al to successful immunohistochemical detection of phosphoproteins in paraffin-embedded tumor tissues..  
ications after lung transplantation: risk factors, prevention and outcome.. European journal of cardio-thora  
s, A Salvatierra. Urgency-code lung transplantation for cystic fibrosis: experience and results.. Transplantati  
ostic factors influencing survival rates in children following lung transplantation.. Transplantation proceedi  
), A Salvatierra. Results of lung transplantation in patients with cystic fibrosis.. Transplantation proceeding  
onnett. Despite decreased wait-list times for lung transplantation, lung allocation scores continue to increas  
2008. 13:#pages#

he physician to the lung transplant team? Patient selection, indications, timing of referral and preparation  
ict of graft colonization with gram-negative bacteria after lung transplantation on the development of bron  
ng transplantation program].. Revue medicale suisse. 2008. 4:#pages#

3. 6:#pages#

Unexpected finding in an explanted heart.. Cardiovascular pathology : the official journal of the Society for C  
of a bone marrow-derived epithelial-like population capable of repopulating injured mouse airway epitheli  
nts with cystic fibrosis: analysis of UNOS data.. The Journal of heart and lung transplantation : the official pu  
ith increased morbidity in cystic fibrosis patients undergoing bilateral lung transplantation: an 'orphan' are  
ation in major transplant centers in the United States.. Critical care medicine. 2009. 37:#pages#

1 after lung transplantation in children.. Transplantation proceedings. . 41:#pages#

Simon. Lung and heart-lung transplantation in children and adolescents: a long-term single-center experi  
ited Network for Organ Sharing data.. Journal of the American College of Surgeons. 2009. 208:#pages#

A Aubert, P Chaffanjon, E Cochet, PY Brichon, B Coltey, C Cracowski, D Bertrand, C Schwebel, D Barnoud, E B  
t of lung transplantation for cystic fibrosis patients: the Zurich experience.. The Journal of heart and lung tr  
ion in infants and toddlers from 1990 to 2004 at St. Louis Children's Hospital.. American journal of transpl:  
ransplantation programme in Ireland 2005-2007.. European journal of cardio-thoracic surgery : official jour  
s human airway submucosal gland secretion mainly via a CFTR-dependent process.. The Journal of clinical i  
il Report of the Cochrane Haematological Malignancies Group-focus on hematopoietic growth factors.. Jou  
Goldfarb, GB Mallory, PJ Mogayzel, D Parakininkas, G Visner, S Sweet, A Faro, M Michaels, LA Danziger-Isakov.  
er. Pseudomonas aeruginosa microevolution during cystic fibrosis lung infection establishes clones with ac  
owing lung transplantation.. Journal of cardiac surgery. . 24:#pages#

t. Pulmonary vascular dysfunction in end-stage cystic fibrosis: role of NF-kappaB and endothelin-1.. The Eur  
el of provision of palliative care to patients with cystic fibrosis.. Palliative medicine. 2009. 23:#pages#

plantation.. Transplant international : official journal of the European Society for Organ Transplantation. 2009. 14:#pages#

g allocation score on lung transplantation for pulmonary arterial hypertension.. American journal of respiratory and critical care medicine. 2009. 179:#pages#

i-Tahar. Lack of MyD88 protects the immunodeficient host against fatal lung inflammation triggered by the infection with Mycobacterium tuberculosis.. American journal of respiratory and critical care medicine. 2009. 179:#pages#

: of pneumonia.. Expert opinion on drug safety. 2009. 8:#pages#

\ Tiddens. The spectrum of structural abnormalities on CT scans from patients with CF with severe advanced disease: analysis of UNOS data.. The Journal of heart and lung transplantation : the official publication of the International Society for Heart and Lung Transplantation. 2009. 14:#pages#

/ilcox, G Ryan, N Brager, H Rabin, N Morrison, P Gibson, M Jackson, N Paterson, P Middleton, SD Aaron. Rare occurrence of multiple lung tumors in a patient with CF.. Molecular medicine (Cambridge, Mass.). 2009. 13:#pages#

ett, SM Arcasoy. Obesity and underweight are associated with an increased risk of death after lung transplantation.. Respiratory medicine. 2009. 103:#pages#

plantation. 2009. 14:#pages#

in transplantation. 2009. 14:#pages#

uille, M Riquet. Single-lung transplantation in patients with previous contralateral pneumonectomy: technical aspects and outcomes.. American journal of transplantation : official journal of the American Society of Transplantation and American Society of Organ Transplantation. 2009. 9:#pages#

g transplantation in adults: a national cohort study.. American journal of transplantation : official journal of the American Society of Transplantation and American Society of Organ Transplantation. 2009. 9:#pages#

[Lung transplantation in cystic fibrosis--a position paper].. Pneumologie (Stuttgart, Germany). 2009. 63:#pages#

onal challenges of the young adult with cystic fibrosis: transition.. The Proceedings of the Nutrition Society. 2009. 58:#pages#

C Bonhome, JM Maté. Surgical risk factors associated with lung transplantation.. Transplantation proceedings. 2009. 41:#pages#

O Pato, JM Borro. Reoperation in the postoperative period of lung transplantation.. Transplantation proceedings. 2009. 41:#pages#

J, S Simonsen. Cyclosporine C2 levels have impact on incidence of rejection in de novo lung but not heart transplantation.. Pediatric pulmonology. 2009. 44:#pages#

ratory and critical care medicine. 2009. 30:#pages#

r respiratory and critical care medicine. 2009. 30:#pages#

S Dabir, T Parsa, F Mohammadi, SD Mansoori, P Tabarsi, MV Amiri, M Marjani, BS Kashani, K Najafizadeh, S Ghahramani. Lung transplantation in Iran: a review of the first 100 cases.. Transplantation. 2009. 88:#pages#

Organ Center of the Organ Procurement and Transplantation Network/United Network for Organ Sharing.. Transplantation. 2009. 88:#pages#

2009. 13:#pages#

tt. Who is the high-risk recipient? Predicting mortality after lung transplantation using pretransplant risk factors.. Anesthesia and analgesia. 2009. 109:#pages#

plantation be performed for patients on mechanical respiratory support? The US experience.. The Journal of heart and lung transplantation : the official journal of the International Society for Heart and Lung Transplantation. 2009. 14:#pages#

ng transplantation: a review of 836 10-year survivors.. The Journal of heart and lung transplantation : the official journal of the International Society for Heart and Lung Transplantation. 2009. 14:#pages#

.illquist, A Davidson. Orthotopic liver transplantation in a patient with carbamyl phosphate synthetase deficiency.. Transplantation. 2009. 88:#pages#

sion making about lung transplantation in cystic fibrosis.. Progress in transplantation (Aliso Viejo, Calif.). 2009. 23:#pages#

i, FP Silveira, M Crespo, MH Nguyen. Impact of mold infections in explanted lungs on outcomes of lung transplantation.. Nephrology, dialysis, transplantation : official publication of the European Society for Organ Transplantation. 2009. 24:#pages#

on in a neonatal to adult transition Pkd1 model of ADPKD.. Nephrology, dialysis, transplantation : official publication of the European Society for Organ Transplantation. 2009. 24:#pages#

plantation proceedings. . 42:#pages#

er. Clinical outcomes of lung-transplant recipients treated by voriconazole and caspofungin combination therapy.. American journal of transplantation : official journal of the American Society of Transplantation and American Society of Organ Transplantation. 2010. 10:#pages#

rson, AJ Fisher, PA Corris, J Lordan, C Ward. Primary bronchial epithelial cell culture from explanted cystic fibrosis patients with cystic fibrosis admitted to the intensive care unit: is invasive mechanical ventilation a risk factor for infection in a patient with cystic fibrosis: a case report.. Journal of medical case reports. 2010. 4:#pages#

:al Absence of the Vas Deferens. GeneReviews. 1993. #volume#:#pages#

chado, MN Samano, P Pêgo-Fernandes, FB Jatene. Impact of cytomegalovirus infection in lung transplant patients.. Respiratory medicine. 2010. 104:#pages#

r and critical care medicine. 2010. 31:#pages#

ory and critical care medicine. 2010. 31:#pages#

model for long-term survival after lung transplantation and implications for the lung allocation score.. The Journal of heart and lung transplantation : the official journal of the International Society for Heart and Lung Transplantation. 2010. 25:#pages#

ult cystic fibrosis patients considering referral for lung transplantation.. Progress in transplantation (Aliso Viejo, Calif.). 2010. 24:#pages#

. Prevalence of pulmonary hypertension in end-stage cystic fibrosis and correlation with survival.. The Journal of heart and lung transplantation : the official journal of the International Society for Heart and Lung Transplantation. 2010. 25:#pages#

ression in German patients with cystic fibrosis.. Chest. 2010. 138:#pages#

09.. Clinical transplants. 2009. :#pages#

ldi. The use of CO2 removal devices in patients awaiting lung transplantation: an initial experience.. *Transplantation*. 2009. 88:#pages#  
o, M Rolla, E Russo, EA Rendina, GF Coloni. Extracorporeal circulatory support for lung transplantation: insight into the pathogenesis of Burkholderia cepacia sepsis following lung transplantation in recipients with cystic fibrosis.. *Transplantation*. 2009. 88:#pages#  
Mallory, O Elidemir. Clostridium difficile colitis in children following lung transplantation.. *Pediatric transplantation*. 2009. 13:#pages#  
ng the translational impact of a home telemonitoring intervention using time-motion study.. *Telemedicine and e-health*. 2010. 16:#pages#  
n infectious diseases. 2010. 23:#pages#

Kessel, JC Grutters, JM Van Den Bosch. Systemic and exhaled cytokine and chemokine profiles are associated with Clostridium difficile-related pancolitis in lung-transplanted patients with cystic fibrosis.. *Clinical transplantation*. 2010. 30:#pages#  
and the novel H1N1 flu.. *Transplantation proceedings*. 2010. 42:#pages#

, S Schueler, AJ Fisher, JH Dark, FK Gould, PA Corris. Lung transplantation for patients with cystic fibrosis and associated complications: a comprehensive review of the literature.. *Medicine*. 2010. 89:#pages#  
ransplantation. 2010. 14:#pages#

ity in lung transplant candidates.. *Transplantation proceedings*. 2010. 42:#pages#

o Santos, A Salvatierra. Results of lung transplantation in idiopathic pulmonary fibrosis patients.. *Transplantation*. 2011. 91:#pages#  
y on the course of cystic fibrosis: A review and meta-analysis.. *Glycobiology*. 2011. 21:#pages#

;-term outcomes of 1000 adult lung transplant recipients at a single center.. *The Journal of thoracic and cardiovascular surgery*. 2010. 42:#pages#  
nts and their living donors: single center experience.. *Transplantation proceedings*. 2010. 42:#pages#

antation in cystic fibrosis patients in the Czech Republic: initial single-center experience.. *Transplantation*. 2010. 90:#pages#  
d helium-3 magnetic resonance imaging: Review of current and emerging translational methods and applications.. *Journal of Magnetic Resonance Imaging*. 2011. 33:#pages#

diabetes mellitus after transplant in adult lung transplant recipients.. *Clinical transplantation*. 2010. 30:#pages#  
: Chaparro. Outcomes of patients with cystic fibrosis undergoing lung transplantation with and without cyclosporine.. *Transplantation*. 2010. 90:#pages#

pneumologie clinique. 2010. 67:#pages#

MB Shadmehr, SS Makki, A Daneshvar, F Ghorbani, K Sheikhy, SR Saghebi. Survival of Iranian patients on lung transplantation.. *Transplantation*. 2011. 91:#pages#  
ejo, Calif.). 2011. 21:#pages#

ez, Y Toyoda, KR McCurry. Does simultaneous lung-liver transplantation provide an immunologic advantage in patients with cystic fibrosis.. *Clinical transplantation*. 2011. 31:#pages#

raud, F Leclair, M Miegerville. Fatal invasive infection with fungemia due to Microascus cirrosus after heart and lung transplantation.. *Diabetes care*. 2011. 34:#pages#

patients: experience of a French center.. *European journal of cardio-thoracic surgery : official journal of the European Association of Cardiothoracic Surgeons*. 2011. 40:#pages#  
gnancy outcomes in the current era of cystic fibrosis care: a 15-year experience.. *The Australian & New Zealand Journal of Obstetrics and Gynaecology*. 2011. 41:#pages#

s patient.. *European respiratory review : an official journal of the European Respiratory Society*. 2011. 20:#pages#  
NC De Oliveira. Colon cancer in lung transplant recipients with CF: increased risk and results of screening.. *Transplantation*. 2011. 91:#pages#

.ópez, R Lavado Hernández. [Percutaneous endoscopic gastrostomy: a 7 years experience long-term tube feeding in patients with cystic fibrosis.. *Diabetes care*. 2011. 34:#pages#

MD Loughheed, V Kumar, SD Aaron. Exacerbation frequency and clinical outcomes in adult patients with cystic fibrosis.. *BMJ case reports*. 2009. 2009:#pages#

er, P Sogni. Liver disease in adult patients with cystic fibrosis: a frequent and independent prognostic factor.. *Journal of the American College of Radiology*. 2011. 18:#pages#  
dications, outcomes, and risk for radiation-induced cancer.. *Journal of the American College of Radiology*. 2011. 18:#pages#  
ral status of strict metabolic control of cystic fibrosis-related diabetes.. *Archivos de bronconeumologia*. 2010. 46:#pages#

on for cystic fibrosis: a single center experience of 100 consecutive cases.. *European journal of cardio-thoracic surgery*. 2011. 40:#pages#

tlieb. Single-centre experience with oral ribavirin in lung transplant recipients with paramyxovirus infection.. *Transplantation*. 2011. 91:#pages#  
ntation for chronic obstructive pulmonary disease.. *American journal of respiratory and critical care medicine*. 2011. 183:#pages#

ington, AJ Boujoukos, Y Toyoda. Extracorporeal membrane oxygenation as a bridge to lung transplant: mid-term outcomes.. *Transplantation*. 2011. 91:#pages#  
y review : an official journal of the European Respiratory Society. 2011. 20:#pages#

after lung transplantation in cystic fibrosis patients.. *Asian cardiovascular & thoracic annals*. 2011. 19:#pages#  
deria cepacia complex be listed for lung transplantation?. *Interactive cardiovascular and thoracic surgery*. 2011. 12:#pages#  
Stehlik, MI Hertz. The Registry of the International Society for Heart and Lung Transplantation: Fourteenth International Report. *Journal of Heart and Lung Transplantation*. 2011. 30:#pages#



tality in Australia, 1979-2005.. The Medical journal of Australia. 2011. 195:#pages#

in Australia, 2009: results from a data registry.. The Medical journal of Australia. 2011. 195:#pages#

1, M Kamler, A Canbay. Elevated gamma-glutamyltransferase is associated with mortality in lung transplant recipients. AR Simon, KC Redmond. Early outcomes of bilateral sequential single lung transplantation after ex-vivo lung perfusion. S D Aaron. Persistency of Pseudomonas aeruginosa in sputum cultures and clinical outcomes in adult patients with cystic fibrosis after lung transplantation.. Journal of cystic fibrosis : official journal of the European Respiratory Society. 2011. 17:#pages#

non-invasive ventilation in cystic fibrosis -- experience over two decades.. Journal of cystic fibrosis : official journal of the European Respiratory Society. 2011. 17:#pages#

lung transplantation for patients with high lung allocation score: single-center experience.. The Annals of thoracic surgery. 2011. 91:#pages#

eybourne, JL Whitehouse, EF Nash, D Kelly, I van Mourik, PN Newsome. Long-term impact of liver transplantation on the waiting list.. European journal of cardio-thoracic surgery : official journal of the European Association of Cardiothoracic Surgeons. 2011. 40:#pages#

Olivier, BA Brown-Elliott, S McNulty, RJ Wallace. Respiratory outbreak of Mycobacterium abscessus subspecies 1 after lung transplantation: a retrospective study.. Journal of cardiothoracic surgery. 2012. 7:#pages#

at the world leaders.. Verhandelingen - Koninklijke Academie voor Geneeskunde van België. 2011. 73:#pages#

n.. Current pharmaceutical design. 2012. 18:#pages#

role of post-transplantation cyclosporine treatment in the course of cystic fibrosis pulmonary disease: a case report and early mortality after lung transplantation: a cohort study.. American journal of transplantation : official journal of the American Society of Transplantation and the American Society of Organ Procurement Organizations. 2012. 12:#pages#

er, R Guillemain, P Marquet, A Rousseau. Population pharmacokinetic modelling and design of a Bayesian adaptive clinical trial to identify risk factors associated with early graft dysfunction in cystic fibrosis patients receiving primary bilateral lung transplantation. Low vitamin D levels are associated with increased rejection and infections after lung transplantation. Chest computed tomography scores are predictive of survival in patients with cystic fibrosis awaiting lung transplantation. Journal of cystic fibrosis : official journal of the European Respiratory Society. 2012. 18:#pages#

petko. Primary lung transplantation after bridge with extracorporeal membrane oxygenation: a plea for a standardized approach. Journal of cardiothoracic surgery. 2012. 7:#pages#

infection misidentified as Empedobacter brevis in a lung transplant recipient with cystic fibrosis.. Transplant infection. 2012. 12:#pages#

in hereditary emphysema secondary to  $\alpha$ 1-antitrypsin deficiency: number and costs of years of life gained.. Clinical lung medicine. 2012. 18:#pages#

sma, HW de Valk. Diabetes before and after lung transplantation in patients with cystic fibrosis and other lung diseases. Journal of cardiothoracic surgery. 2012. 7:#pages#

alte. Outcome of critically ill lung transplant candidates on invasive respiratory support.. Intensive care medicine. 2012. 17:#pages#

mechanisms and management.. Current gastroenterology reports. 2012. 14:#pages#

ard-Gaubert, R Kessler, F Philit, R Dorent, M Stern. One-year experience with high-emergency lung transplantation. Journal of cardiothoracic surgery. 2012. 7:#pages#

High-order SNP combinations associated with complex diseases: efficient discovery, statistical power and application to disease gene discovery. Nature reviews Genetics. 2012. 13:#pages#

g for solid-phase testing for antibodies to HLA: effects on listing unacceptable antigens for thoracic organ transplantation. Journal of cardiothoracic surgery. 2012. 7:#pages#

is, JP Mathew, T Martinu, S Palmer. Changes in neurocognitive functioning following lung transplantation. Journal of cardiothoracic surgery. 2012. 7:#pages#

ert, H Reichenspurner, . Tacrolimus and cyclosporine have differential effects on the risk of development of acute rejection after lung transplantation. Journal of cardiothoracic surgery. 2012. 7:#pages#

re adaptation of Pseudomonas aeruginosa reduces virulence in multiple infection hosts.. PloS one. 2012. 7:#pages#

robiology. 2012. 7:#pages#

EA Rendina, N Li Phd, GF Coloni. Pulmonary hypertension is associated with higher mortality in cystic fibrosis patients. Journal of cardiothoracic surgery. 2012. 7:#pages#

roquinolone resistance of Gram-negative bacteria in respiratory secretions on the outcome of lung transplantation. Journal of cardiothoracic surgery. 2012. 7:#pages#

ment in pediatric lung transplant patients: a survey of current practices among the International Pediatric Lung Transplant Society. Journal of cardiothoracic surgery. 2012. 7:#pages#

A Molinaro, M Wimmerova, A Imberty, A Silipo. Burkholderia cenocepacia lectin A binding to heptoses from Burkholderia cenocepacia. Journal of biological chemistry. 2012. 287:#pages#

árez, P Usetti, F Zurbano. Contraception, pregnancy and rare respiratory diseases.. Archivos de bronconeurología. 2012. 8:#pages#

sion and attenuates proliferation of breast cancer in vivo.. Oncogene. 2013. 32:#pages#

w and emerging therapies.. Drug design, development and therapy. 2012. 6:#pages#

for three months after lung transplantation does not reduce infection with Aspergillus: a retrospective study. Journal of cardiothoracic surgery. 2012. 7:#pages#

ak, B Ksiazek, A Magner, A Bartoszewicz, P Kubicki, G Hydzik, A Zebrowska, J Kozielski. Pulmonary rehabilitation in patients with cystic fibrosis after lung transplantation. Journal of cardiothoracic surgery. 2012. 7:#pages#

ial sodium channel (ENaC) by the alkaline protease from Pseudomonas aeruginosa.. The Journal of biological chemistry. 2012. 287:#pages#

. Pregnancy after lung transplant.. Progress in transplantation (Aliso Viejo, Calif.). 2012. 22:#pages#

ç, B Varkey, LG Singer. Barriers to optimal palliative care of lung transplant candidates.. Chest. 2013. 143:#pages#

Growing experience with extracorporeal membrane oxygenation as a bridge to lung transplantation.. ASAIO journal. 2012. 58:#pages#

orales, J Pastor, A Salvatierra, A de Pablo, P Gámez, A Moreno, J Solé, A Román. The Spanish Lung Transplant Registry. Journal of cardiothoracic surgery. 2012. 7:#pages#

cal, GB Mallory, MG Schechter. Lung transplantation for childhood diffuse lung disease.. Pediatric pulmonology. 2012. 47:#pages#

1. Symptom burden, quality of life, and attitudes toward palliative care in patients with pulmonary arterial transplantation for patients with cystic fibrosis by socioeconomic status.. American journal of respiratory and critical care medicine. 2012. 187:#pages#

2. Long-term outcomes of bilateral lobar lung transplantation.. European journal of cardio-thoracic surgery : official journal of the European Association for Thoracic Surgery. 2013. 43:#pages#

3. Extracorporeal membrane oxygenation with spontaneous breathing as a bridge to lung transplantation.. Interactive cardiovascular medicine and therapeutics. 2013. 7:#pages#

4. Bone marrow transplantation in sickle cell disease. In vivo confocal microscopy in diagnosis of limbal stem cell deficiency.. American journal of ophthalmology. 2013. 156:#pages#

5. Cyclosporine A improves survival in lung transplantation for cystic fibrosis.. Transplantation. 2013. 95:#pages#

6. Do we really do it?. Therapeutic advances in respiratory disease. 2013. 7:#pages#

7. A novel surgical approach for intratracheal administration of bioactive aerosols.. American journal of respiratory and critical care medicine. 2013. 187:#pages#

8. Treatment-emergent adverse events after infusion of intravenous immunoglobulin in patients with cystic fibrosis.. Chest. 2013. 143:#pages#

9. Effect on outcome in children after lung transplantation.. The Journal of heart and lung transplantation : the official journal of the International Society for Heart and Lung Transplantation. 2013. 32:#pages#

10. EA Rendina, N Li PhD, GF Coloni. Pulmonary hypertension is associated with higher mortality in cystic fibrosis patients.. American journal of respiratory and critical care medicine. 2013. 187:#pages#

11. Westall, MG Schechter. Lung transplantation in children following bone marrow transplantation: a national survey.. American journal of respiratory and critical care medicine. 2013. 187:#pages#

12. Bronchiectasis and bronchiolitis in lung transplant recipients with bronchiolitis obliterans syndrome.. The Thoracic and Cardiovascular Journal. 2013. 24:#pages#

13. M Cheifetz. Active rehabilitation during extracorporeal membrane oxygenation as a bridge to lung transplantation.. American journal of respiratory and critical care medicine. 2013. 187:#pages#

14. Lung transplantation from cystic fibrosis: 10-year analysis from two London specialist centres.. Archives of disease in childhood. 2013. 98:#pages#

15. Pulmonary disease is not a contraindication to lung transplantation in patients with cystic fibrosis: a retrospective analysis of lung and liver-lung transplantations.. Transplantation proceedings. 2013. 45:#pages#

16. Mortality and quality of life of lung transplantation in cystic fibrosis patients.. Journal of cystic fibrosis : official journal of the European Cystic Fibrosis Society. 2013. 12:#pages#

17. Extracorporeal membrane oxygenation as a bridge to pulmonary transplantation.. The Journal of thoracic and cardiovascular medicine. 2013. 24:#pages#

18. Extracorporeal membrane oxygenation as a bridge to lung transplantation.. The Journal of thoracic and cardiovascular medicine. 2013. 24:#pages#

19. Diabetes in children with cystic fibrosis related diabetes.. Pediatric diabetes. 2013. 14:#pages#

20. An international review of thoracic diseases. 2013. 85:#pages#

21. Ruberto, G Mazzei, AG Marullo, G Frati, F Venuta. Lung transplantation for cystic fibrosis: outcome of 101 patients.. American journal of respiratory and critical care medicine. 2013. 187:#pages#

22. Organ retrieval from traumatic brain-dead donors does not compromise outcomes following lung transplantation for cystic fibrosis: a report from Baylor College of Medicine and the Texas Children's Hospital.. Pediatric transplantation. 2013. 17:#pages#

23. Cerebral stroke work index as a negative predictor of mortality and initial hospital stay after lung transplantation.. American journal of respiratory and critical care medicine. 2013. 187:#pages#

24. Ejection fraction during exercise as a predictor of mortality in patients awaiting lung transplantation: a cohort study.. American journal of respiratory and critical care medicine. 2013. 187:#pages#

25. I Schulze-Neick, V Muthurangu. Prognostic significance of cardiac magnetic resonance imaging in children with cystic fibrosis.. American journal of respiratory and critical care medicine. 2013. 187:#pages#

26. Pulmonary hypertension is a mild comorbidity in end-stage cystic fibrosis patients.. The Journal of heart and lung transplantation : the official journal of the International Society for Heart and Lung Transplantation. 2013. 32:#pages#

27. Long-term benefit of lung transplant for cystic fibrosis since lung allocation score implementation.. American journal of respiratory and critical care medicine. 2013. 187:#pages#

28. Allogeneic stem cell-derived cells: prospects for the treatment of lung diseases.. Current stem cell research & therapy. 2014. 9:#pages#

29. Correia, FB Jatene. Lung transplantation in patients with cystic fibrosis.. Transplantation proceedings. 2013. 45:#pages#

30. Is lung transplantation a decision maker?. Pediatrics. 2013. 131:#pages#

31. Lung transplantation in cystic fibrosis patients with pre-operative Mycobacterium abscessus respiratory infections.. Clinical transplantation. 2013. 27:#pages#

32. Prevalence of disease.. American journal of respiratory and critical care medicine. 2013. 187:#pages#

33. Lung transplantation in children and adolescents in respiratory and critical care medicine. 2013. 34:#pages#

34. Extracorporeal membrane oxygenation catheterization measuring central hemodynamics in cystic fibrosis during exercise.. Respiratory medicine. 2013. 107:#pages#

35. J Penhardt, I Allix, F Bonichon, E Morelon, S Lebouilleux, A Kelly, P Niccoli, ME Toubert, L Frimat, MC Vantyghem. Long-term mortality risk in lung transplant recipients.. The Journal of heart and lung transplantation : the official journal of the International Society for Heart and Lung Transplantation. 2013. 32:#pages#

36. Long-term results of lobar lung transplantations.. European journal of cardio-thoracic surgery : official journal of the European Association for Thoracic Surgery. 2013. 43:#pages#

37. A López-Encuentra, P Benavides, P Gamez, . Analysis of patients referred to a lung transplantation unit.. Transplantation. 2013. 95:#pages#

38. J Penhardt, M Reynaud-Gaubert, C Saint-Raymond, E Sage, M Stern, P Thomas, Y Castier, R Dorent, H Mal. Experience with lung transplantation: doing everything possible?. The Journal of heart and lung transplantation : the official publication of the International Society for Heart and Lung Transplantation. 2013. 32:#pages#

programme: update 2012.. Swiss medical weekly. 2013. 143:#pages#

nion in organ transplantation. 2013. 18:#pages#

Costa. Urgent lung transplantation national program: the Italian experience.. Transplantation proceeding  
is and dietetic interventions on survival in Cystic Fibrosis patients before and after lung transplantation.. Jo  
Current opinion in pulmonary medicine. 2013. 19:#pages#

matology. 2013. 25:#pages#

ation of GFR in South Asians: a study from the general population in Pakistan.. American journal of kidney  
ing the causal effect of organ transplantation on the distribution of residual lifetime.. Biometrics. 2013. 69

c liver-pancreas transplantation as a curative treatment for liver cirrhosis and diabetes mellitus in cystic fib  
H Podder, A Saharia, EH Asham, M Boktour, AO Gaber, RM Ghobrial. Combined lung and liver transplantati  
Dusser, I Fajac, PR Burgel. Prognostic value of six minute walk test in cystic fibrosis adults.. Respiratory med  
childhood. 2014. 99:#pages#

performance of organic solution advanced spray-dried microparticulate/nanoparticulate antibiotic dry po  
aspects.. Archivos de bronconeumologia. 2013. 49:#pages#

lis, S Husain. Pretransplant Aspergillus colonization of cystic fibrosis patients and the incidence of post-lun  
iting rejection following lung transplantation in cystic fibrosis.. The Cochrane database of systematic review  
veness of dry powder antibiotics for the treatment of Pseudomonas aeruginosa in patients with cystic fibro  
ter lung transplant.. Archivos de bronconeumologia. 2014. 50:#pages#

lung' review series.. Respirology (Carlton, Vic.). 2014. 19:#pages#

ves in medicine. 2014. 4:#pages#

nary hypertension on survival in patients with cystic fibrosis undergoing lung transplantation: an analysis o  
ung transplant patient with cystic fibrosis.. Medical mycology case reports. 2013. 2:#pages#

successful prevention of scedosporiosis after lung transplantation in a cystic fibrosis patient by combined lo  
in Raemdonck, M Congregado, H Decaluwe, T Grodzki, T Lerut, T Molnar, M Salati, M Scarci, P Van Schil, G V  
y venous conduit with CorMatrix in lung transplant.. Asian cardiovascular & thoracic annals. 2013. 21:#pa  
a treatment option in end-stage lung disease.. Deutsches Arzteblatt international. 2014. 111:#pages#

infection and comorbidities.. Expert review of respiratory medicine. 2014. 8:#pages#

ter lung transplantation: a systematic review and meta-analysis.. PloS one. 2014. 9:#pages#

arfection in mice.. Journal of visualized experiments : JoVE. 2014. :#pages#

pel, M Selzner, M Liu, S Keshjavee, J Pawliszyn. Low invasive in vivo tissue sampling for monitoring biomarl  
ardt, TO Wagner, . Practical guidelines: lung transplantation in patients with cystic fibrosis.. Pulmonary m  
(Bucharest, Romania). . 63:#pages#

recipient phenotype in heterotopically transplanted rat allografts.. Chinese medical journal. 2014. 127:#pa  
istics and outcomes of patients with lung transplantation requiring admission to the medical ICU.. Chest. 2  
of cystic fibrosis: a systematic review of qualitative studies.. Pediatrics. 2014. 133:#pages#

er Ent, T Takken. Prediction of mortality in adolescents with cystic fibrosis.. Medicine and science in sports  
s. Introduction of the lung allocation score in Germany.. American journal of transplantation : official jour  
V Pego-Fernandes. Pediatric lung transplantation: 10 years of experience.. Clinics (Sao Paulo, Brazil). 2014  
ally, D Slattery, L Daly, NG McElvaney, B Bourke. Outcome in patients with cystic fibrosis liver disease.. Jour  
t in a child with cystic fibrosis and persistent Blastobotrys rhafricanus infection.. Pediatric transp  
erled. Body mass index in lung transplant candidates: a contra-indication to transplant or not?. Transplai  
stic fibrosis and their families.. The Cochrane database of systematic reviews. 2014. :#pages#

immunosuppression in cystic fibrosis lung transplant recipients.. Journal of cystic fibrosis : official journal  
e care unit visitation: perceptions of patients' family members, physicians, and nurses.. American journal of  
Y Brichon, F Tronc, J Jougon, M Dahan, XB D'Journo, M Reynaud-Gaubert, D Trousse, C Doddoli, PA Thoma  
rt devices and strategies for management of acute cardiorespiratory failure in adult patients: a comprehens  
V Gaynor, C Pizarro, IA Williams, SD Colan, C Dunbar-Masterson, PJ Gruber, K Hill, J Hirsch-Romano, JP Jacc  
tatistics in medicine. 2014. 33:#pages#

urgeois, A Munck, I Pin, I Sermet, C Gutierrez, N Véziris, V Jarlier, E Cambau, JL Herrmann, D Guillemot, JL Gerson, LG Singer, GI Snell, GM Verleden, MR Zamora, AR Glanville. A consensus document for the selection of lung transplantation for advanced cystic lung disease due to nonamyloid kappa light chain disease. *Journal of Internal Medicine*. 2014. 275:#pages#

M Fernandes, LG Abdalla, PM Pêgo-Fernandes. Fungal infection by Mucorales order in lung transplantation: revival of an abandoned operation.. *Current opinion in organ transplantation*. 2014. 19:#pages#

Faruqi, A. Is there a need for an effective drug treatment for bronchiolitis obliterans?. *Expert opinion on pharmacotherapy*. 2014. 15:#pages#

Johnson, D. Long-Term Outcome after Lung Transplantation in the Lung Allocation Score Era.. *The Thoracic and Critical Care Medicine*. 2014. 19:#pages#

Kishore, R. Lung transplantation in cystic fibrosis with advanced lung disease.. *American journal of respiratory and critical care medicine*. 2014. 189:#pages#

Kreja, L Shah, H Robbins, K Van Horn, RJ Shah, JM Diamond, N Wickersham, L Sun, S Hays, SM Arcasoy, SM Parsons, H Yüksel, P Catastini, L Blackwell, D Barker. Prevalence of depression and anxiety in patients with cystic fibrosis. *Journal of Intensive Care Medicine*. 2014. 29:#pages#

Kulkarni, A. Mesenchymal Stem Cells in Treating Patients with Cystic Fibrosis.. *Advances in experimental medicine and biology*. 2014. 34:#pages#

Kulkarni, A, Durham, JA Blumenthal. Neurocognitive changes after lung transplantation.. *Annals of the American Thoracic Society*. 2015. 12:#pages#

Kulkarni, A, Staab, G Thalhammer, S van Koningsbruggen-Rietschel, M Ballmann. High variability in oral glucose tolerance test in patients with cystic fibrosis: a cohort study.. *The European respiratory journal*. 2015. 45:#pages#

Kulkarni, A, Van Raemdonck. Lobar lung transplantation from deceased donors: a valid option for small-sized patients. *Journal of Intensive Care Medicine*. 2015. 30:#pages#

Kulkarni, A, et al. Lung transplantation in children with cystic fibrosis after lung transplantation.. *Pediatric transplantation*. 2015. 19:#pages#

Kulkarni, A, et al. [Fungal infection in a patient with cystic fibrosis and a lung transplant].. *Revista espanola de anesthesiologia y reanimacion*. 2015. 58:#pages#

Kulkarni, A, et al. Lung transplantation: indications, contraindications, and controversies.. *European respiratory review : an official journal of the European Respiratory Society*. 2015. 20:#pages#

Kulkarni, A, et al. Ganciclovir (GCV) levels and GCV-resistant cytomegalovirus in lung transplant recipients.. *Transplant infection and clinical organ donation*. 2015. 15:#pages#

Kulkarni, A, et al. Lung transplantation with large pulmonary embolus using the lung organ care system for ex vivo thrombolysis and subsequent reperfusion. *Journal of Intensive Care Medicine*. 2015. 30:#pages#

Kulkarni, A, et al. Mass spectrometry for the detection of bacteria and fungi in bronchoalveolar lavage fluid. *Journal of Intensive Care Medicine*. 2015. 30:#pages#

Kulkarni, A, et al. Lung transplantation for children through air transport.. *Air medical journal*. 2015. 34:#pages#

Kulkarni, A, et al. Lung transplantation: challenges and opportunities for the future.. *Tissue engineering. Part B, Reviews*. 2015. 21:#pages#

Kulkarni, A, et al. Lung transplantation. *Journal of Intensive Care Medicine*. 2015. 19:#pages#

Kulkarni, A, et al. OPTN/SRTR 2013 Annual Data Report: lung.. *American journal of transplantation*. 2015. 15:#pages#

Kulkarni, A, et al. End-of-life management by palliative care: A retrospective case series.. *Palliative medicine*. 2015. 29:#pages#

Kulkarni, A, et al. Risk of death in patients with cystic fibrosis.. *Journal of clinical epidemiology*. 2015. 68:#pages#

Kulkarni, A, et al. Burden of serious fungal infections in Spain.. *Clinical microbiology and infection*. 2015. 19:#pages#

Kulkarni, A, et al. [Indications of lung transplantation: Patients selection, timing of listing, and choice of primary transplant center]. *Journal of Intensive Care Medicine*. 2015. 30:#pages#

Kulkarni, A, et al. Indications for cardiovascular surgery in cystic fibrosis: update on diagnosis and treatment.. *Jornal brasileiro de pneumologia : publicacao oficial da Sociedade Brasileira de Pneumologia e Tisiologia*. 2015. 21:#pages#

Kulkarni, A, et al. Implementation of a cystic fibrosis lung transplant referral patient decision support system. *Journal of Intensive Care Medicine*. 2015. 30:#pages#

Kulkarni, A, et al. National Healthcare Delivery Systems Influence Lung Transplant Outcomes for Cystic Fibrosis.. *Journal of Intensive Care Medicine*. 2015. 30:#pages#

Kulkarni, A, et al. Post-lung transplant mortality risk in patients with chronic obstructive pulmonary disease.. *The Journal of heart and lung transplantation : the official journal of the International Society for Heart and Lung Transplantation*. 2015. 34:#pages#

Kulkarni, A, et al. Proteasome inhibition in heart transplantation.. *The Journal of heart and lung transplantation : the official journal of the International Society for Heart and Lung Transplantation*. 2015. 34:#pages#

Kulkarni, A, et al. Indications, complications, and controversies.. *Seminars in respiratory and critical care medicine*. 2015. 36:#pages#

Kulkarni, A, et al. Lung transient elastography, for the detection of liver disease in adults with cystic fibrosis.. *Canadian journal of respiratory and critical care medicine*. 2015. 20:#pages#

Kulkarni, A, et al. *Trichomonas maltophilia* Infection in Cystic Fibrosis Does Not Reduce Survival After Lung Transplantation.. *Transplantation*. 2015. 100:#pages#

Kulkarni, A, et al. Blood transfusion in bilateral lung transplantation: impact on early function and mortality.. *European journal of cardiothoracic surgery*. 2015. 48:#pages#

Kulkarni, A, et al. Lung transplantation: Parquin, J Devaquet, G Trebbia, E Cuquemelle, B Douvry, C Picard, M Le Guen, A Chapelier, M Stern, E Sage, J Lecomte, J Lecomte, JA Blumenthal. Development and psychometric properties of the Pulmonary-specific Quality-of-Life Index in Serious Illness: A Systematic Review.. *JAMA internal medicine*. 2015. 175:#pages#

Kulkarni, A, et al. HLA-G\*01:04~UTR3 Recipient Correlates With Lower Survival and Higher Frequency of Rejection in Lung Transplantation.. *Journal of Intensive Care Medicine*. 2015. 30:#pages#

Kulkarni, A, et al. Health-related quality of life in cystic fibrosis.. *BMJ open*. 2015. 5:#pages#

Kulkarni, A, et al. Surgeon's viewpoint on lung transplantation. *Journal of Intensive Care Medicine*. 2015. 30:#pages#



rs, P Hopkins, W Gesierich, M Phillips, F Stanzel, WH McNulty, C Petermann, G Snell, D Gompelmann. Segr  
rgaden, R Miller, J Smith, JA Young, D Hawkinson, K Pursell, DR Kaul. Current practices for treatment of res  
:ic Fibrosis Patients After Lung Transplantation.. Lung. 2016. 194:#pages#  
n mean residual life functions under random censorship.. Pharmaceutical statistics. 2016. 15:#pages#  
to improve advance care planning for LVAD patients and their surrogates.. Heart & lung : the journal of crit  
. Cambridge quarterly of healthcare ethics : CQ : the international journal of healthcare ethics committees.  
odríguez-González, I Herrero-Labarga, A Quittner, G Oliveira. Depression and anxiety symptoms in Spanish a  
ict infections.. Current opinion in pulmonary medicine. 2016. 22:#pages#  
crolimus in solid organ transplantation.. World journal of transplantation. 2016. 6:#pages#  
t-reported symptoms and functioning as indicators of mortality in advanced cystic fibrosis: A new tool for r  
mbaro, M Chilosi, A Lupo, G Zaza. Everolimus-induced epithelial to mesenchymal transition (EMT) in bronc  
cke, B Meyns, F Nevens, G Verleden, D Van Raemdonck, J Pirenne. Combined liver-thoracic transplantation  
ctic neuropathy with extended prone position ventilation in a lung transplant recipient.. International jou  
stedt. 25-year follow-up after lung transplantation at Lund University Hospital in Sweden: superior results  
rosis : official journal of the European Cystic Fibrosis Society. 2016. 15:#pages#  
obials after lung transplantation and the development of multidrug-resistant bacterial and Clostridium diffi  
LC Morlacchi, M Nosotti. Lung Allocation Score: A Single-Center Simulation.. Transplantation proceedings  
stic fibrosis patients with the G551D mutation.. The European respiratory journal. 2016. 47:#pages#  
survival in children with cystic fibrosis after lung transplantation.. Pediatric pulmonology. 2016. 51:#page  
in the Pathogenesis and Treatment of Pediatric Lung Disease.. Frontiers in pediatrics. 2016. 4:#pages#  
rod cell transfusions for managing chronic chest complications in sickle cell disease.. The Cochrane databas  
Gottlieb. Lung transplantation for non-cystic fibrosis bronchiectasis.. Respiratory medicine. 2016. 115:#  
nsequences of Expiratory Flow Limitation at Rest in Subjects with Cystic Fibrosis.. Annals of the American Ti  
er, G Lang, S Taghavi, W Klepetko, P Jaksch, MA Hoda. Lung transplantation in patients with incidental earl  
ally Nonsignificant Primary Outcomes Published in High-impact Surgical Journals.. Annals of surgery. 2017  
'isca. Role of Iron Uptake Systems in Pseudomonas aeruginosa Virulence and Airway Infection.. Infection an  
Arterial Partial Pressure of Oxygen on Outcomes After Lung Transplantation in Adult Cystic Fibrosis Recipien  
. Epidemiologia e prevenzione. . 40:#pages#  
with lung transplantation in cystic fibrosis: An analysis of the registry of the International Society for Heart  
irway complications after lung transplantation: Contemporary survival and outcomes.. The Journal of hear  
rs for De Novo Malignancy Following Lung Transplantation.. American journal of transplantation : official j  
murine model of chronic pulmonary Pseudomonas aeruginosa infection.. Journal of cystic fibrosis : official  
ffects on survival of recipients with cystic fibrosis.. The Journal of heart and lung transplantation : the offici  
ic fibrosis care in Europe: Results of a care centre survey.. Journal of cystic fibrosis : official journal of the Eu  
riosi, JP Howard, HR Flori, MA Matthay, A Sapru. A Simple and Robust Bedside Model for Mortality Risk in P  
an, G Meachery, G Parry, PA Corris. Observational study of lung transplant recipients surviving 20 years.. Re  
s with Medicaid Insurance Awaiting Lung Transplantation.. Lung. 2016. 194:#pages#  
y, S Finch, A Pesci, LJ Dupont, TC Fardon, D Skrbic, D Obradovic, S Cowman, MR Loebinger, RM Rutherford,  
ult cystic fibrosis despite attenuated lung function decline.. Journal of cystic fibrosis : official journal of the  
ed disease.. Translational research : the journal of laboratory and clinical medicine. 2017. 179:#pages#  
#  
a medica de Chile. 2016. 144:#pages#  
g-term clinical outcomes of 'Prairie Epidemic Strain' infection in adults with cystic fibrosis.. Thorax. 2017.  
Fibrosis: Three Cases and an Institutional Review.. Chest. 2016. 150:#pages#  
with idiopathic pulmonary fibrosis.. BMC palliative care. 2016. 15:#pages#  
etween patients in paediatric and adult age.. Revista portuguesa de pneumologia. . 23:#pages#  
lung transplant referral and waitlist for patients with cystic fibrosis and pulmonary fibrosis.. The Journal o  
ederer, SM Palmer. Survival Benefit of Lung Transplantation in the Modern Era of Lung Allocation.. Annals c

. 2017. 55:#pages#

ary Risk Scores and Postoperative Complications in Renal Transplant Recipients.. Experimental and clinical cystic fibrosis: Is it time to start US-guided neuraxial blocks?. Saudi journal of anaesthesia. . 10:#pages# respiratory medicine. 2016. 10:#pages#

Wilson, MR Loebinger, D Skrbic, D Obradovic, A De Soyza, C Ward, JG Laffey, RM Rutherford, JD Chalmers. of cystic fibrosis hospitalizations and co-morbidities in the United States.. Advances in respiratory medicine ; JD Newell, M Porteous, JM Diamond, JD Christie, DJ Lederer. Chest Fat Quantification via CT Based on Standard-Gaubert, H Vacher-Coponat. Nocardiosis in the south of France over a 10-years period, 2004-2014.. Importance of gastrointestinal dysmotility and complications detected by abdominal plain films after lung transplant primary and secondary stroke in people with sickle cell disease.. The Cochrane database of systematic reviews. the timing of referral for lung transplant evaluation: a survey of physicians in the United States.. BMC pulmonary medicine. 2017. 17:#pages# heterogeneity in Survival in Adult Patients With Cystic Fibrosis With FEV < 30% of Predicted in the United States High tacrolimus blood concentrations early after lung transplantation and the risk of kidney injury.. European journal of clinical microbiology and infectious diseases. 2017. 36:#pages# ampicillin in adult patients with cystic fibrosis in the management of chronic infection.. Multidisciplinary respiratory approach to transition from paediatric to adult care]. Archives de pediatrie : organe officiel de la Societe française de pediatrie. 2017. 23:#pages# sthesiologists Classification Versus ARISCAT Risk Index: Predicting Pulmonary Complications Following Renal Transplantation. A clinical tool to calculate post-transplant survival using pre-transplant clinical characteristics in adult patients with cystic fibrosis. Journal of Intensive Care Medicine. 2017. 32:#pages# extracorporeal CO2 removal for acute hypercapnic respiratory failure.. Minerva anesthesiologica. 2017. 83:#pages#

ert, CH Goss. Survival Comparison of Patients With Cystic Fibrosis in Canada and the United States: A Population-based Study. Journal of cystic fibrosis : official journal of the European Cystic Fibrosis Society. 2017. 16:#pages# effectiveness of an Adherence Intervention to Improve Outcomes for Patients with Cystic Fibrosis.. Pharmacotherapy. 2017. 37:#pages# multilocus sequence typing-based approach.. Folia microbiologica. 2017. 62:#pages#

cystic fibrosis in Sweden.. European journal of cardio-thoracic surgery : official journal of the European Association of Cardiothoracic Surgeons. 2017. 51:#pages# cty reports. 2017. 19:#pages#

associated with Achromobacter Species Infection in Patients with Cystic Fibrosis.. Annals of the American Thoracic Society. 2017. 14:#pages# Journal of nuclear medicine technology. 2017. 45:#pages#

enzi, M Iezzi, M Romano, A Recchiuti. Resolvin D1 enhances the resolution of lung inflammation caused by human CLDN5 alleles encode different open reading frames but produce one protein isoform.. Annals of the American Thoracic Society. 2017. 14:#pages# transplant recipients with cystic fibrosis.. Journal of cystic fibrosis : official journal of the European Cystic Fibrosis Society. 2017. 16:#pages# M Nosotti, L Rosso. Lobar Lung Transplantation From Deceased Donor: Monocentric Experience.. Transplantation. 2017. 103:#pages# Lung Transplantation From Donors After Previous Cardiac Surgery: Ideal Graft in Marginal Donor?. Transplantation. 2017. 103:#pages# come of Lung Transplant Recipients: An Analysis of OPTN/UNOS Data.. Clinical transplants. 2015. 31:#pages# cystic fibrosis: a nationwide analysis of ventilator use, outcomes, and resource burden.. BMC pulmonary medicine. 2017. 17:#pages# respiratory disease and exocrine pancreatic insufficiency).. Presse medicale (Paris, France : 1983). 2017. 46:#pages#

Antonelli Incalzi, . Characterization of circadian COPD symptoms by phenotype: Methodology of the STORIC study. BMC Pulmonary Medicine. 2017. 17:#pages# EM Billaud. Clinical outcome of cystic fibrosis patients colonized by Scenedesporium species following lung transplantation. BMC Pulmonary Medicine. 2017. 17:#pages#

in pediatric lung transplant recipients.. The Journal of heart and lung transplantation : the official publication of the International Society for Heart and Lung Transplantation. 2017. 36:#pages# glycopolymer sensitizes Burkholderia cepacia complex isolates from cystic fibrosis patients to tobramycin. BMC Pulmonary Medicine. 2017. 17:#pages#

: A 2017 update.. Journal of cystic fibrosis : official journal of the European Cystic Fibrosis Society. 2017. 16:#pages# , ML Aitken. Tracheal diverticula in advanced cystic fibrosis: Prevalence, features, and outcomes after lung transplantation. BMC Pulmonary Medicine. 2017. 17:#pages#

icine. 2017. 38:#pages# B Orens, P Shah, CA Merlo, BS Kim, EL Bush. Impaired Renal Function Should Not Be a Barrier to Transplant: A Review of the Literature. American journal of transplantation. 2017. 17:#pages# treatment of cystic fibrosis-related liver disease.. Current opinion in pulmonary medicine. 2017. 23:#pages#

ř, M Schechter, G Visner, NM Williams, L Danziger-Isakov. Risk and outcomes of pulmonary fungal infection in cystic fibrosis patients. BMC Pulmonary Medicine. 2017. 17:#pages# R Kramer. Lung transplantation in cystic fibrosis patients in Israel: The importance of ethnicity and nutritional status. BMC Pulmonary Medicine. 2017. 17:#pages#

specialty Clinics.. Child and adolescent psychiatric clinics of North America. 2017. 26:#pages# frequency practice patterns at U.S. adult cystic fibrosis care centers: A national retrospective chart review.. Journal of cystic fibrosis : official journal of the European Cystic Fibrosis Society. 2017. 16:#pages#

r. 2017. 26:#pages#

and unusual presentation of Cladophialophora infection in a pulmonary transplant cystic fibrosis patient.. *Transplantation*. 2018. 106:100-103.

10. Prevalence of Fecal Incontinence in Adults with Cystic Fibrosis.. *Digestive diseases and sciences*. 2018. 63:100-103.

11. Depression, social support, and clinical outcomes following lung transplantation: a single-center cohort study. *Journal of thoracic disease*. 2017. 9:#pages#

12. E Sage, C Prunier, M Drumm, CA Hodges, PY Boëlle, L Guillot. FAM13A is a modifier gene of cystic fibrosis. *Journal of cystic fibrosis*. 2017. 15:100-103.

13. Outcomes of Lumacaftor/Ivacaftor in Cystic Fibrosis Patients with Homozygous phe508del Mutation.. *Value in health*. 2017. 12:#pages#

14. A randomized trial of an early palliative care intervention (SUPPORT) for patients with idiopathic pulmonary fibrosis. *Journal of clinical oncology*. 2017. 35:100-103.

15. Kumura, A Iwasaki, T Shiraishi, S Maeda, Y Matsumura, T Nakajima, I Yoshino, S Hayashi. Nontuberculous mycobacterial infection in a lung transplant recipient. *Journal of thoracic disease*. 2017. 9:#pages#



pl 1:#pages#

ial secreting functions of HLA-DR monocytes, involving not only collagen but also uromodulin, amyloid-be  
c surgery : official journal of the European Association for Cardio-thoracic Surgery. 1992. 6:#pages#  
13:#pages#  
tation.. Transplantation proceedings. 1992. 24:#pages#

ation. . 11:#pages#  
:horacic surgery. 1992. 53:#pages#  
liovascular surgery. 1992. 103:#pages#  
surgery. 1992. 54:#pages#

surgery. 1992. 103:#pages#

oup.. JAMA. 1991. 266:#pages#  
52:#pages#

ildhood. 1991. 66:#pages#  
ournal of thoracic and cardiovascular surgery. 1991. 101:#pages#

al of heart transplantation. . 9:#pages#

the European Association for Cardio-thoracic Surgery. 1990. 4:#pages#  
cardio-thoracic surgery : official journal of the European Association for Cardio-thoracic Surgery. 1990. 4:#

liologistes. 1989. 40:#pages#  
pages#

ar experience.. The Journal of thoracic and cardiovascular surgery. 1995. 110:#pages#  
est. 1995. 108:#pages#  
fficial publication of the International Society for Heart Transplantation. . 13:#pages#  
e medicine. 1994. 149:#pages#  
.. The Journal of thoracic and cardiovascular surgery. 1995. 109:#pages#

aring. International Society for Heart and Lung Transplantation.. Clinical transplants. 1994. :#pages#

pages#

e Journal of thoracic and cardiovascular surgery. 1993. 105:#pages#

rnal of the European Association for Cardio-thoracic Surgery. 1995. 9:#pages#  
for Parenteral and Enteral Nutrition. 1995. 10:#pages#

he Journal of heart and lung transplantation : the official publication of the International Society for Heart  
plants performed in the state.. The Journal of the Louisiana State Medical Society : official organ of the Louis

rsplant Team.. Surgery. 1994. 116:#pages#  
lant Group.. Acta chirurgica Belgica. . 94:#pages#

of the International Society for Heart Transplantation. . 12:#pages#

pages#

Papworth Hospital.. The Journal of heart and lung transplantation : the official publication of the Internati  
heart and lung transplantation : the official publication of the International Society for Heart Transplantation  
of the International Society for Heart Transplantation. . 12:#pages#

2:#pages#

ic surgery. 1993. 56:#pages#

the official publication of the International Society for Heart Transplantation. . 12:#pages#

rsity Lung Transplant Programs.. The Journal of thoracic and cardiovascular surgery. 1993. 105:#pages#

n : the official publication of the International Society for Heart Transplantation. . 12:#pages#

osis.. The Annals of thoracic surgery. 1993. 55:#pages#

is undergoing liver transplantation for biliary cirrhosis.. The Journal of pediatrics. 1995. 127:#pages#

1996. 32:#pages#

tion of the International Society for Heart Transplantation. . 14:#pages#

Journal of heart and lung transplantation : the official publication of the International Society for Heart Tr  
ter heart transplantation?]. Revista espanola de cardiologia. 1996. 49:#pages#

publication of the International Society for Heart Transplantation. 1996. 15:#pages#

ciety for Heart Transplantation. 1996. 15:#pages#

nical transplants. 1995. :#pages#

idge.. Clinical transplants. 1995. :#pages#

Il d'Hebron].. Archivos de bronconeumologia. . 32:#pages#

ublication of the International Society for Heart Transplantation. 1996. 15:#pages#

o-thoracic surgery : official journal of the European Association for Cardio-thoracic Surgery. 1996. 10:#pag

1996. 112:#pages#

':#pages#

for Heart Transplantation. 1997. 16:#pages#

s#

e medicine. 1997. 155:#pages#

ation. 1997. 16:#pages#

ransplantation.. American journal of surgery. 1997. 173:#pages#

nals of thoracic surgery. 1997. 64:#pages#

nical transplants. 1996. :#pages#

ean respiratory journal. 1997. 10:#pages#

iovascular surgery. 1997. 114:#pages#

oracic and cardiovascular surgery. 1998. 115:#pages#

onal Society for Heart Transplantation. 1998. 17:#pages#

ages#

cation of the International Society for Heart Transplantation. 1998. 17:#pages#

ingle European center.. Transplantation. 1998. 66:#pages#

s. 1998. 30:#pages#  
surgery. 1998. 66:#pages#

Journal of the European Association for Cardio-thoracic Surgery. 1998. 14:#pages#

Official journal of Austrian Association of Pediatric Surgery ... [et al] = Zeitschrift für Kinderchirurgie. 1998.  
Journal of pediatric surgery : official journal of Austrian Association of Pediatric Surgery ... [et al] = Zeitschrift  
für Lungtransplantation : the official publication of the International Society for Heart Transplantation. 19

Organic transplants. 1997. :#pages#

and Neoral in de novo lung transplant recipients.. Therapeutic drug monitoring. 1999. 21:#pages#

Journal of the European Association for Cardio-thoracic Surgery. 1999. 15:#pages#  
Journal of the International Society for Heart Transplantation. 1999. 18:#pages#  
of human colorectal cancer.. Cancer letters. 1998. 132:#pages#  
analysis.. The Journal of clinical investigation. 1999. 104:#pages#  
Journal of the International Society for Heart Transplantation Group of Vall d'Hebron University General Hospital].. Medicina clinica. 1999. 113:#pa

Organic transplants. 1998. :#pages#  
Pediatric Nurse Associates & Practitioners. . 13:#pages#  
) . 354:#pages#

es#  
Journal of the European Association for Cardio-thoracic Surgery. 1999. 16:#pages#

analysis.. The Journal of thoracic and cardiovascular surgery. 2000. 119:#pages#  
2000. 13:#pages#  
analysis.. American journal of respiratory and critical care medicine. 2000. 161:#pages#  
. 2000. 69:#pages#

Journal of the International Society for Heart Transplantation. 2000. 34:#pages#  
Journal of the International Society for Heart Transplantation. 2000. 162:#pages#  
.. Clinical transplants. 1999. :#pages#  
Journal of the International Society for Heart Transplantation. 2000. 19:#pages#

medullary collecting ducts.. Nephrology, dialysis, transplantation : official publication of the European Dialysis and Transplant Association. 2001. 163:#pages#

transplantation.. American journal of respiratory and critical care medicine. 2001. 163:#pages#

International Society for Heart Transplantation. 2001. 20:#pages#  
Journal. 2001. 15:#pages#

transplantation.. Transplantation proceedings. . 33:#pages#  
transplant candidates.. The European respiratory journal. 2000. 16:#pages#

transplantation.. The European respiratory journal. 2000. 16:#pages#

Journal of heart and lung transplantation : the official publication of the International Society for Heart Transplantation. 2001. 20:#pages#

transplantation.. Human gene therapy. 2001. 12:#pages#  
with mutant k-ras.. Virchows Archiv : an international journal of pathology. 2001. 438:#pages#  
transplants. 2000. :#pages#

renal function and clinical outcome.. European journal of medical research. 2001. 6:#pages#  
transplantation in cystic fibrosis patients.. Pediatric transplantation. 2001. 5:#pages#  
analysis of the Illness Intrusiveness Ratings Scale.. Medical care. 2001. 39:#pages#  
predictors of outcome in lymphangiomyomatosis.. American journal of respiratory and critical care medicine. 2001. 164:#pages#  
transplantation.. Intensive care medicine. 2001. 27:#pages#  
: international medical journal of experimental and clinical research. . 7:#pages#

transplantation. 2001. 72:#pages#  
1. 44:#pages#

cystic fibrosis.. Lancet (London, England). 2001. 358:#pages#  
American journal of respiratory and critical care medicine. 2001. 164:#pages#  
Journal of the International Society for Heart Transplantation. 2001. 20:#pages#  
the official publication of the International Society for Heart Transplantation. 2001. 20:#pages#

transplantation. 2001. 67:#pages#

Journal of heart and lung transplantation : the official publication of the International Society for Heart Transplantation. 2002. 21:#pages#  
Journal of the International Society for Heart Transplantation. 2002. 21:#pages#  
transplantation. 2002. 21:#pages#

Journal of heart and lung transplantation : the official publication of the International Society for Heart Transplantation. 2002. 21:#pages#  
Journal of heart and lung transplantation : the official publication of the International Society for Heart Transplantation. 2002. 21:#pages#

tral center for lung transplantation.. Journal of clinical microbiology. 2002. 40:#pages#  
2002. 33:#pages#

al of respiratory and critical care medicine. 2002. 165:#pages#  
the official publication of the International Society for Heart Transplantation. 2002. 21:#pages#  
gery. 2002. 74:#pages#  
n and allow for rapid steroid tapering.. Transplantation proceedings. 2002. 34:#pages#

tion : the official publication of the International Society for Heart Transplantation. 2002. 21:#pages#  
: official journal of the European Association for Cardio-thoracic Surgery. 2002. 22:#pages#

al care medicine. 2002. 166:#pages#

American journal of respiratory and critical care medicine. 2003. 167:#pages#

ients with cystic fibrosis awaiting lung transplantation. Am J Respir Crit Care Med 2002;165;1629-1633.. P

d lung transplantation : the official publication of the International Society for Heart Transplantation. 200:  
gery. 2003. 75:#pages#

tical care medicine. 2003. 168:#pages#  
:ial publication of the International Society for Heart Transplantation. 2003. 22:#pages#  
lteria cepacia complex.. European journal of clinical microbiology & infectious diseases : official publicati

skelity. 2003. 104:#pages#  
ournal of heart and lung transplantation : the official publication of the International Society for Heart Tran  
al Society for Heart Transplantation. 2003. 22:#pages#

s experience.. Journal of pediatric surgery. 2003. 38:#pages#

ation. 2004. 77:#pages#  
Lung Transplant Registry.. Swiss medical weekly. 2004. 134:#pages#  
strointestinal surgery : official journal of the Society for Surgery of the Alimentary Tract. 2004. 8:#pages#

: outcomes.. The Journal of thoracic and cardiovascular surgery. 2004. 127:#pages#

ience.. The Journal of heart and lung transplantation : the official publication of the International Society f  
erral centre.. The Journal of hospital infection. 2004. 56:#pages#

transplant recipients.. American journal of transplantation : official journal of the American Society of Tran  
ation proceedings. 2004. 36:#pages#

osis on long-term survival.. The Journal of thoracic and cardiovascular surgery. 2004. 127:#pages#

se to assess antibody-mediated rejection in solid organ transplantation.. American journal of transplantati

ion.. The Israel Medical Association journal : IMAJ. 2004. 6:#pages#

tional Society for Heart Transplantation. 2004. 23:#pages#

!002. 1:#pages#

f the European Cystic Fibrosis Society. 2003. 2:#pages#

3. 2:#pages#

Cystic Fibrosis Society. 2004. 3:#pages#

tical care medicine. 2005. 171:#pages#

gery : official journal of the European Association for Cardio-thoracic Surgery. 2004. 26:#pages#

al publication of the International Society for Heart Transplantation. 2005. 24:#pages#

ung transplantation : the official publication of the International Society for Heart Transplantation. 2005. :

al imaging. 2005. 18:#pages#

n Cystic Fibrosis Society. 2005. 4:#pages#

A single-center experience of 983 patients.. The Journal of thoracic and cardiovascular surgery. 2005. 129:;

al of heart and lung transplantation : the official publication of the International Society for Heart Transplai

the International Society for Heart Transplantation. 2005. 24:#pages#

ng : the journal of critical care. . 34:#pages#

. 33:#pages#

. 50:#pages#

unction in lung transplantation.. The Journal of heart and lung transplantation : the official publication of t  
international Society for Heart Transplantation. 2005. 24:#pages#

level analysis.. Respiratory research. 2005. 6:#pages#

ansplant.. The Annals of thoracic surgery. 2005. 80:#pages#

he official publication of the International Society for Heart Transplantation. 2005. 24:#pages#  
national Society for Heart Transplantation. 2005. 24:#pages#

1.. The Journal of heart and lung transplantation : the official publication of the International Society for He  
005. 3:#pages#

lung transplantation before and after lung transplantation.. Clinical transplantation. 2005. 19:#pages#

in.. The Journal of heart and lung transplantation : the official publication of the International Society for H  
Journal of heart and lung transplantation : the official publication of the International Society for Heart Trans  
surgery. 2006. 81:#pages#

ntation proceedings. 2005. 37:#pages#

thoracic surgery : official journal of the European Association for Cardio-thoracic Surgery. 2006. 29:#pages#

journal of respiratory and critical care medicine. 2006. 173:#pages#

medicine : a publication of the IEEE Engineering in Medicine and Biology Society. 2006. 10:#pages#

Heart Transplantation. 2006. 25:#pages#

icial journal of the American Society of Transplantation and the American Society of Transplant Surgeons. 2  
pages#

ttie del torace. 2006. 65:#pages#

ng transplantation.. Transplantation proceedings. 2006. 38:#pages#

rnational guidelines for the selection of lung transplant candidates: 2006 update--a consensus report from i

raeli experience.. The Israel Medical Association journal : IMAJ. 2006. 8:#pages#

sporine C2 monitoring.. The Journal of heart and lung transplantation : the official publication of the Inter

ter.. Journal of cystic fibrosis : official journal of the European Cystic Fibrosis Society. 2007. 6:#pages#

alpha affect survival in cystic fibrosis.. Journal of medical genetics. 2007. 44:#pages#

the highly epidemic and virulent gram-negative bacterium Burkholderia cenocepacia ET-12 (strain J2315)..

edicine : a publication of the IEEE Engineering in Medicine and Biology Society. 2007. 11:#pages#

osis.. The Journal of heart and lung transplantation : the official publication of the International Society for

11-year single-center experience.. The Journal of thoracic and cardiovascular surgery. 2007. 133:#pages#

in journal of cardio-thoracic surgery : official journal of the European Association for Cardio-thoracic Surger

Journal of heart and lung transplantation : the official publication of the International Society for Heart Trans



is.. Lung. . 185:#pages#  
rosis Society. 2007. 6:#pages#  
: the initial Hannover experience.. ASAIO journal (American Society for Artificial Internal Organs : 1992). . 5  
model.. Journal of pediatric hematology/oncology. 2007. 29:#pages#  
ic Fibrosis Society. 2007. 6:#pages#  
cardiothoracic and vascular anesthesia. 2007. 21:#pages#

ng adult lung transplant recipients.. Pediatric transplantation. 2007. 11:#pages#  
l Life Support Organization (ELSO) registry.. The Journal of heart and lung transplantation : the official publi  
rnal of the American Society of Transplantation and the American Society of Transplant Surgeons. 2007. 7:#  
007. 24:#pages#  
ng transplantation: a case report and review of literature.. Journal of cardiothoracic surgery. 2007. 2:#page  
2007. 83:#pages#

ascular and thoracic surgery. 2004. 3:#pages#  
teria other than Burkholderia cepacia, compared with patients harboring sensitive bacteria.. The Journal o  
ng transplantation : the official publication of the International Society for Heart Transplantation. 2007. 26  
France : 1983). 2007. 36:#pages#  
ical microbiology & infectious diseases : official publication of the European Society of Clinical Microbiolo  
manifestation--a case report.. Transplantation proceedings. 2007. 39:#pages#  
on. 2007. 22:#pages#

#  
r : official journal of the American Society of Transplantation and the American Society of Transplant Surgec

ernational Association for the Study of the Liver. 2007. 27:#pages#  
ernational : official journal of the European Society for Organ Transplantation. 2008. 21:#pages#

oday. 2008. 38:#pages#  
s: a multicenter study.. The Journal of thoracic and cardiovascular surgery. 2008. 135:#pages#

geons. 2008. 8:#pages#  
c transplantation. 2008. 12:#pages#  
rnal of transplantation : official journal of the American Society of Transplantation and the American Socie

sis.. The Journal of pediatrics. 2008. 152:#pages#  
l lung and liver transplantation: a single-center experience on 13 consecutive cases.. Transplantation. 2008

ual. 2008. :#pages#  
plex: results from two French centres.. Thorax. 2008. 63:#pages#

large UK cohort.. Thorax. 2008. 63:#pages#  
sner, S Sweet, A Faro. Increased mortality after pulmonary fungal infection within the first year after pediat  
s#  
ransplantation.. Journal of psychosomatic research. 2008. 65:#pages#

ation for cystic fibrosis: ten years of experience.. Transplantation proceedings. . 40:#pages#

ntation : the official publication of the International Society for Heart Transplantation. 2008. 27:#pages#  
ctance regulator-/- mice.. American journal of respiratory cell and molecular biology. 2009. 40:#pages#

ion.. European journal of cardio-thoracic surgery : official journal of the European Association for Cardio-th  
nternational Society for Heart Transplantation. 2008. 27:#pages#  
09. 179:#pages#

The journal of histochemistry and cytochemistry : official journal of the Histochemistry Society. 2009. 57  
acic surgery : official journal of the European Association for Cardio-thoracic Surgery. 2009. 35:#pages#  
on proceedings. 2008. 40:#pages#  
ings. 2008. 40:#pages#  
s. 2008. 40:#pages#  
se.. Chest. 2009. 135:#pages#

for lung transplantation].. Revue des maladies respiratoires. 2008. 25:#pages#  
chiolitis obliterans syndrome in recipients with cystic fibrosis.. Respiratory medicine. 2009. 103:#pages#

ardiovascular Pathology. . 19:#pages#  
um.. The Journal of clinical investigation. 2009. 119:#pages#  
ublication of the International Society for Heart Transplantation. 2009. 28:#pages#  
a? A retrospective case-control study.. Internal medicine journal. 2009. 39:#pages#

ence.. The Journal of heart and lung transplantation : the official publication of the International Society fo

rambilla, S Lantuéjoul, G Ferretti, I Pin, D Blin, C Pison, . Dramatic improvement in survival after lung tran  
ansplantation : the official publication of the International Society for Heart Transplantation. 2009. 28:#p  
antation : official journal of the American Society of Transplantation and the American Society of Transplan  
nal of the European Association for Cardio-thoracic Surgery. 2009. 35:#pages#  
nvestigation. 2009. 119:#pages#  
rnal of the National Cancer Institute. 2009. 101:#pages#  
Respiratory viral infections within one year after pediatric lung transplant.. Transplant infectious disease :  
adapted virulence.. American journal of respiratory and critical care medicine. 2009. 180:#pages#

uropean respiratory journal. 2009. 34:#pages#

009. 22:#pages#  
atory and critical care medicine. 2009. 180:#pages#  
: opportunistic bacteria Burkholderia cenocepacia.. Journal of immunology (Baltimore, Md. : 1950). 2009.

lung disease.. Thorax. 2009. 64:#pages#  
International Society for Heart Transplantation. 2009. 28:#pages#  
andomized trial of a decision aid for patients with cystic fibrosis considering lung transplantation.. American  
. 15:#pages#  
itation.. American journal of respiratory and critical care medicine. 2009. 180:#pages#

nical aspects and results.. European journal of cardio-thoracic surgery : official journal of the European Assc  
ation : official journal of the American Society of Transplantation and the American Society of Transplant Su  
of the American Society of Transplantation and the American Society of Transplant Surgeons. 2009. 9:#page  
#pages#  
. 2009. 68:#pages#  
ings. . 41:#pages#  
eedings. . 41:#pages#  
ransplant recipients: the NOCTURNE study.. The Journal of heart and lung transplantation : the official publ

Shafaghi, F Ghorbani, MR Masjedi, AA Velayati. Eight years of lung transplantation: experience of the Natio  
. Progress in transplantation (Aliso Viejo, Calif.). 2009. 19:#pages#

actors.. The Journal of thoracic and cardiovascular surgery. 2009. 138:#pages#

thoracic and cardiovascular surgery. 2010. 139:#pages#  
official publication of the International Society for Heart Transplantation. 2010. 29:#pages#  
iciency and cystic fibrosis.. Paediatrics & child health. 2003. 8:#pages#  
009. 19:#pages#  
ransplantation.. Transplantation. 2010. 89:#pages#  
ublication of the European Dialysis and Transplant Association - European Renal Association. 2010. 25:#pa

aspergillosis.. Journal of clinical pharmacy and therapeutics. 2010. 35:#pages#  
fibrosis lungs.. Experimental lung research. 2010. 36:#pages#  
or for death in patients waiting lung transplantation?. Heart & lung : the journal of critical care. . 39:#pages

patients under universal prophylaxis: single-center experience in Brazil.. Transplantation proceedings. 2010

Journal of heart and lung transplantation : the official publication of the International Society for Heart Tra  
Viejo, Calif.). 2010. 20:#pages#

nal of heart and lung transplantation : the official publication of the International Society for Heart Transpl

plantation proceedings. 2010. 42:#pages#  
titutional experience.. Transplantation proceedings. 2010. 42:#pages#  
: infectious disease : an official journal of the Transplantation Society. 2010. 12:#pages#  
plantation. 2010. 14:#pages#  
e journal and e-health : the official journal of the American Telemedicine Association. 2010. 16:#pages#

ed with the development of bronchiolitis obliterans syndrome.. The Journal of heart and lung transplantati  
splantation. . 25:#pages#

nd Burkholderia cepacia complex infection: a single-center experience.. The Journal of heart and lung trans  
tation proceedings. 2010. 42:#pages#

diovascular surgery. 2011. 141:#pages#

oceedings. 2010. 42:#pages#  
itions.. Journal of magnetic resonance imaging : JMRI. 2010. 32:#pages#  
f  
stic fibrosis-associated liver cirrhosis.. Clinical transplantation. . 26:#pages#

ng transplant waiting list: is there any difference?. Transplantation proceedings. 2011. 43:#pages#

ge compared with isolated lung transplantation?. The Journal of thoracic and cardiovascular surgery. 2011.  
#pages#  
nd lung transplantation in a patient with cystic fibrosis.. Journal of clinical microbiology. 2011. 49:#page:

European Association for Cardio-thoracic Surgery. 2011. 40:#pages#  
nd journal of obstetrics & gynaecology. 2011. 51:#pages#  
pages#  
Journal of cystic fibrosis : official journal of the European Cystic Fibrosis Society. 2011. 10:#pages#  
eding. Follow-up].. Nutricion hospitalaria. . 26:#pages#  
stic fibrosis.. Thorax. 2011. 66:#pages#  
ages#  
r associated with death or lung transplantation.. Journal of hepatology. 2011. 55:#pages#  
JACR. 2011. 8:#pages#  
11. 47:#pages#  
cic surgery : official journal of the European Association for Cardio-thoracic Surgery. 2012. 41:#pages#  
ns.. Antiviral therapy. 2011. 16:#pages#  
ine. 2011. 184:#pages#  
term outcomes.. The Annals of thoracic surgery. 2011. 92:#pages#

ages#  
2011. 13:#pages#  
Pediatric Lung and Heart-Lung Transplantation Report--2011.. The Journal of heart and lung transplantatio

ation for cystic fibrosis.. Transplant international : official journal of the European Society for Organ Transplantation evaluation and reconditioning.. The Journal of heart and lung transplantation : the official publication of the International Society for Heart and Lung Transplantation. 2012. 11:#pages#  
It patients with cystic fibrosis.. European journal of clinical microbiology & infectious diseases : official publication of the European Cystic Fibrosis Society. 2012. 11:#pages#  
Journal of the European Cystic Fibrosis Society. 2012. 11:#pages#  
c surgery. 2012. 93:#pages#  
itation on respiratory function and nutritional status in children and adults with cystic fibrosis.. American journal of transplantation. 2012. 12:#pages#  
Association for Cardio-thoracic Surgery. 2012. 41:#pages#  
species massiliense in a lung transplant and cystic fibrosis center.. American journal of respiratory and critical care medicine. 2012. 185:#pages#

report.. Immunopharmacology and immunotoxicology. 2012. 34:#pages#  
journal of the American Society of Transplantation and the American Society of Transplant Surgeons. 2012. 12:#pages#  
estimator for therapeutic drug monitoring of tacrolimus in lung transplantation.. Clinical pharmacokinetics and biopharmaceutics. 2012. 51:#pages#  
plantation.. European journal of cardio-thoracic surgery : official journal of the European Association for Cardio-thoracic Surgery. 2012. 41:#pages#  
n.. The Journal of heart and lung transplantation : the official publication of the International Society for Heart and Lung Transplantation.. American journal of respiratory and critical care medicine. 2012. 185:#pages#  
shift in our paradigms for indications.. Transplantation. 2012. 93:#pages#  
fectious disease : an official journal of the Transplantation Society. 2012. 14:#pages#  
initial drug investigation. 2012. 32:#pages#  
lung diseases.. Diabetic medicine : a journal of the British Diabetic Association. 2012. 29:#pages#  
medicine. 2012. 38:#pages#

plantation in France.. Transplantation. 2012. 93:#pages#  
functional interactions.. PloS one. 2012. 7:#pages#  
transplantation.. Human immunology. 2012. 73:#pages#  
.. American journal of transplantation : official journal of the American Society of Transplantation and the American Society of Transplant Surgeons. 2012. 12:#pages#  
f bronchiolitis obliterans syndrome: results of a prospective, randomized international trial in lung transplantation.. American journal of transplantation. 2012. 12:#pages#

osis patients awaiting lung transplantation.. The Journal of cardiovascular surgery. 2012. 43:#pages#  
ant (non-cystic fibrosis) recipients.. Clinical transplantation. 2012. 26:#pages#  
lung Transplant Collaborative.. Pediatric transplantation. 2012. 16:#pages#  
from the bacterial lipopolysaccharide.. Glycobiology. 2012. 22:#pages#  
nologia. 2012. 48:#pages#

dy of 147 patients.. Scandinavian journal of infectious diseases. 2012. 44:#pages#  
tion in patients referred for lung transplantation.. Advances in experimental medicine and biology. 2013. 749:#pages#  
al chemistry. 2012. 287:#pages#

pages#  
) journal (American Society for Artificial Internal Organs : 1992). 2012. 12:#pages#  
: Registry: first report of results (2006-2010).. Archivos de bronconeumologia. 2013. 49:#pages#  
ogy. 2013. 48:#pages#

hypertension: results from a cross-sectional patient survey.. The Journal of heart and lung transplantation and critical care medicine. 2012. 186:#pages#

ges#

eria.. Transplantation proceedings. 2012. 44:#pages#

icial journal of the European Association for Cardio-thoracic Surgery. 2013. 43:#pages#

diovascular and thoracic surgery. 2013. 16:#pages#

proves the outcome of Atm-deficient mice through the migration of ATM-competent cells.. Human molecular genetics. 2013. 155:#pages#

ternational : official journal of the European Society for Organ Transplantation. 2013. 26:#pages#

gents in a fetal mouse model.. Journal of visualized experiments : JoVE. 2012. :#pages#

ion of adherent stem cells: the MiSOT-I score for solid organ transplantation.. Trials. 2012. 13:#pages#

official publication of the International Society for Heart Transplantation. 2013. 32:#pages#

osis patients awaiting lung transplantation.. The Journal of cardiovascular surgery. 2012. 53:#pages#

multi-center experience.. Pediatric transplantation. 2013. 17:#pages#

d cardiovascular surgeon. 2013. 61:#pages#

ntation.. Respiratory care. 2013. 58:#pages#

hood. 2013. 98:#pages#

analysis in a Danish patient population.. Transplantation proceedings. . 45:#pages#

ournal of the European Cystic Fibrosis Society. 2013. 12:#pages#

vascular surgery. 2013. 145:#pages#

vascular surgery. 2013. 145:#pages#

single-center consecutive patients.. Transplantation proceedings. . 45:#pages#

ion.. European journal of cardio-thoracic surgery : official journal of the European Association for Cardio-thoracic Surgery. 2013. 17:#pages#

on.. The Journal of heart and lung transplantation : the official publication of the International Society for Heart and Lung Transplantation. 2013. 3:#pages#

en with pulmonary hypertension.. Circulation. Cardiovascular imaging. 2013. 6:#pages#

l of heart and lung transplantation : the official publication of the International Society for Heart Transplantation and critical care medicine. 2013. 187:#pages#

:#pages#

3. 45:#pages#

ation. . 27:#pages#

2013. 107:#pages#

em, C Bournaud, M Schlumberger, F Borson-Chazot, . Is thyroid cancer recurrence risk increased after transplantation? The Journal of heart and lung transplantation : the official publication of the International Society for Heart Transplantation. 2013. 32:#pages#

f the European Association for Cardio-thoracic Surgery. 2014. 45:#pages#

ansplantation proceedings. . 45:#pages#

ef of extracorporeal membrane oxygenation as a bridge to lung transplantation in France.. The Journal of heart and lung transplantation : the official publication of the International Society for Heart Transplantation. 2013. 32:#pages#

gs. 2013. 45:#pages#

urnal of cystic fibrosis : official journal of the European Cystic Fibrosis Society. 2014. 13:#pages#

diseases : the official journal of the National Kidney Foundation. 2014. 63:#pages#

l:#pages#

rosis.. Pediatric transplantation. 2014. 18:#pages#

ion: analysis of a single-center experience.. Liver transplantation : official publication of the American Assoc  
licine. 2013. 107:#pages#

wders of tobramycin and azithromycin for pulmonary inhalation aerosol delivery.. European journal of pha

ig transplant invasive aspergillosis.. Transplantation. 2014. 97:#pages#

vs. 2013. :#pages#

sis.. PharmacoEconomics. 2014. 32:#pages#

f the UNOS registry.. Journal of cystic fibrosis : official journal of the European Cystic Fibrosis Society. 2014

cal and systemic triazole therapy.. Medical mycology case reports. 2013. 2:#pages#

arela, F Venuta, F Melfi, C Gebitekin, J Kuzdzal, G Leschber, I Opitz, K Papagiannopoulos, A Patterson, E Ruffi  
ges#

cers and drugs during surgery.. Laboratory investigation; a journal of technical methods and pathology. 20:  
edicine. 2014. 2014:#pages#

ges#

!014. 146:#pages#

and exercise. 2014. 46:#pages#

nal of the American Society of Transplantation and the American Society of Transplant Surgeons. 2014. 14:  
. 69 Suppl 1:#pages#

rnal of cystic fibrosis : official journal of the European Cystic Fibrosis Society. 2015. 14:#pages#

lantation. 2014. 18:#pages#

ntation proceedings. 2014. 46:#pages#

l of the European Cystic Fibrosis Society. 2015. 14:#pages#

f critical care : an official publication, American Association of Critical-Care Nurses. 2014. 23:#pages#

s. High-emergency waiting list for lung transplantation: early results of a nation-based study.. European jou  
ive review.. Critical care (London, England). 2014. 18:#pages#

obs, JR Kaltman, SR Kumar, D Morales, SM Bradley, K Kanter, JW Newburger, . Technical performance score

ailard, . Comparing Mycobacterium massiliense and Mycobacterium abscessus lung infections in cystic fibrosis lung transplant candidates: 2014—an update from the Pulmonary Transplantation Council of the International Society for Heart and Lung Transplantation. Annals of the American Thoracic Society. 2014. 11:#pages#

. 15:#pages#

rdiovascular surgeon. 2015. 63:#pages#

dicine. 2014. 190:#pages#

almer, LB Ware, JD Christie, DJ Lederer. Body composition and mortality after adult lung transplantation in patients with cystic fibrosis and parent caregivers: results of The International Depression Epidemiological Study across nine countries. Journal of Clinical Investigation. 2015. 125:#pages#

racic Society. 2014. 11:#pages#

tolerance among 1,128 patients with cystic fibrosis: a multicenter screening study.. PloS one. 2014. 9:#pages#

nal. 2015. 45:#pages#

g infection.. PloS one. 2014. 9:#pages#

ts with cystic fibrosis.. Transplantation proceedings. 2014. 46:#pages#

animacion. 2015. 62:#pages#

2014. 23:#pages#

ctitious disease : an official journal of the Transplantation Society. 2014. 16:#pages#

ent clinical transplantation.. Transplantation. 2015. 99:#pages#

ids: a prospective observational study.. Clinical microbiology and infection : the official publication of the International Society for Antimicrobial Chemotherapy. 2015. 21:#pages#

ntation : official journal of the American Society of Transplantation and the American Society of Transplant Physicians. 2015. 34:#pages#

iology and infection : the official publication of the European Society of Clinical Microbiology and Infectious Diseases [and the European Society for Antimicrobial Chemotherapy]. Revue de pneumologie clinique. 2016. 72:#pages#

ar magnetic resonance in children with congenital and acquired heart disease: an expert consensus paper of the Brazilian Society of Cardiology. Brazilian journal of medical and biological research. 2015. 48:#pages#

aid in routine clinical practice: an observational study.. Implementation science : IS. 2015. 10:#pages#

. American journal of transplantation : official journal of the American Society of Transplantation and the American Society of Organ Procurement. 2015. 15:#pages#

art and lung transplantation : the official publication of the International Society for Heart Transplantation and the International Society for Organ Procurement. 2015. 34:#pages#

pages#

fgastroenterology & hepatology. 2015. 29:#pages#

nsplantation. 2015. 99:#pages#

, SL Bellamy, AR Localio, JD Christie. Objective Estimates Improve Risk Stratification for Primary Graft Dysfunction in Lung Transplantation. Annals of cardio-thoracic surgery : official journal of the European Association for Cardio-thoracic Surgery. 2015. 5:#pages#

, . High Emergency Lung Transplantation: dramatic decrease of waiting list death rate without relevant high-risk factors. The Journal of heart and lung transplantation : the official publication of the International Society for Heart and Lung Transplantation. 2015. 34:#pages#

uency of Chronic Rejection After Lung Transplantation.. American journal of transplantation : official journal of the American Society of Transplantation and the American Society of Organ Procurement. 2015. 15:#pages#

ntation in cystic fibrosis patients - preliminary report.. Developmental period medicine. 2015. 19:#pages#



2015. 12:#pages#

osis.. The Journal of heart and lung transplantation : the official publication of the International Society for  
on.. The Annals of thoracic surgery. 2015. 100:#pages#

Receptor 4 (TLR4)-Myeloid Differentiation Factor 2 (MD-2) by Hypoacylated Lipopolysaccharide from a Clini  
ges#

International Society for Heart Transplantation. 2015. 34:#pages#

udy.. Jornal brasileiro de pneumologia : publicacao oficial da Sociedade Brasileira de Pneumologia e Tisiolog  
of thoracic and cardiovascular surgery. 2015. 150:#pages#

publication of the International Society for Heart Transplantation. 2015. 34:#pages#

rosis: A Single-Centre Experience.. Lung. 2015. 193:#pages#

stitutional Experience and Literature Review.. Transplantation. 2015. 99:#pages#

rnal of the European Cystic Fibrosis Society. 2016. 15:#pages#

ition : official journal of the American Society of Transplantation and the American Society of Transplant Su  
n referral strategies!. Journal of cystic fibrosis : official journal of the European Cystic Fibrosis Society. 2016

gy. 2016. 202:#pages#

osis.. The Journal of thoracic and cardiovascular surgery. 2016. 151:#pages#

76:#pages#

ntation.. Lung. 2015. 193:#pages#

Welte, F Blasi. Report of the European Respiratory Society/European Cystic Fibrosis Society task force on th  
edicine. 2015. 66:#pages#

. 2016. 100:#pages#

rd adults.. European journal of cardio-thoracic surgery : official journal of the European Association for Car  
tpages#

s#

. General thoracic and cardiovascular surgery. 2016. 64:#pages#

e Middle East Society for Organ Transplantation. 2015. 13:#pages#

risk factor for poor clinical Outcomes following lung transplantation.. Journal of cystic fibrosis : official jou  
ceedings. 2015. 47:#pages#

ry. 2016. 101:#pages#

on for Cystic Fibrosis Patients.. PloS one. 2015. 10:#pages#

stic fibrosis : official journal of the European Cystic Fibrosis Society. 2016. 15:#pages#

). 2016. 21:#pages#

016. 61:#pages#

ibrosis.. Annals of transplantation. 2015. 20:#pages#

Charybdis.. Chest. 2016. 149:#pages#

ages#

ects.. Jornal brasileiro de pneumologia : publicacao oficial da Sociedade Brasileira de Pneumologia e Tisiolog  
Aguilar, J Aguirre-Ghiso, EM Airoidi, S Ait-Si-Ali, T Akematsu, ET Akporiaye, M Al-Rubeai, GM Albaiceta, C Alb

mental volume reduction using thermal vapour ablation in patients with severe emphysema: 6-month result  
respiratory syncytial virus and other non-influenza respiratory viruses in high-risk patient populations: a survey

ical care. . 45:#pages#

2016. 25:#pages#

adult patients with cystic fibrosis: associations with health-related quality of life.. General hospital psychiat

referral and selection for lung transplantation.. The Journal of heart and lung transplantation : the official p  
hial/pulmonary cells: when the dosage does matter in transplantation.. Journal of nephrology. 2016. 29:#  
: single-center experience with introduction of the 'Liver-first' principle.. Transplant international : official j  
rnal of critical illness and injury science. . 6:#pages#

obtained for patients with cystic fibrosis.. Interactive cardiovascular and thoracic surgery. 2016. 23:#pag

cile infections: an analysis of 500 non-cystic fibrosis lung transplant patients.. Clinical transplantation. 20:  
s. 2016. 48:#pages#

s:#

e of systematic reviews. 2016. :#pages#

pages#

horacic Society. 2016. 13:#pages#

y stage lung cancer-institutional experience of a high volume center.. Clinical transplantation. 2016. 30:#  
. 265:#pages#

d immunity. 2016. 84:#pages#

ts.. Lung. 2016. 194:#pages#

and Lung Transplantation.. The Journal of heart and lung transplantation : the official publication of the In  
t and lung transplantation : the official publication of the International Society for Heart Transplantation.  
ournal of the American Society of Transplantation and the American Society of Transplant Surgeons. 2017.  
l journal of the European Cystic Fibrosis Society. 2016. 15:#pages#

al publication of the International Society for Heart Transplantation. 2016. 35:#pages#

ropean Cystic Fibrosis Society. 2017. 16:#pages#

ediatric Patients With Acute Respiratory Distress Syndrome.. Pediatric critical care medicine : a journal of t  
spiratory medicine. 2016. 117:#pages#

A De Soyza, JD Chalmers. Multidimensional severity assessment in bronchiectasis: an analysis of seven Euro  
e European Cystic Fibrosis Society. 2017. 16:#pages#

72:#pages#

f heart and lung transplantation : the official publication of the International Society for Heart Transplantat  
of the American Thoracic Society. 2017. 14:#pages#

Transplantation : official journal of the Middle East Society for Organ Transplantation. 2016. 14:#pages#

Comorbidities and the risk of mortality in patients with bronchiectasis: an international multicentre cohort study. 2016. 84:#pages#

Standardized Anatomy Space in Adult Lung Transplant Candidates.. PloS one. 2017. 12:#pages#

International journal of infectious diseases : IJID : official publication of the International Society for Infectious Diseases. 2016. 41:#pages#

Transplantation: a single-centre cohort study.. BMJ open respiratory research. 2016. 3:#pages#

2017. 1:#pages#

Primary medicine. 2017. 17:#pages#

Respiratory medicine. Chest. 2017. 151:#pages#

European journal of clinical pharmacology. 2017. 73:#pages#

Respiratory medicine. 2017. 12:#pages#

Revue de pediatrie. 2016. 23:#pages#

Transplantation.. Experimental and clinical transplantation : official journal of the Middle East Society for Organ Transplantation. 2017. 31:#pages#

2017. 31:#pages#

Transplantation-Based Cohort Study.. Annals of internal medicine. 2017. 166:#pages#

2017. 16:#pages#

Economics. 2017. 35:#pages#

Transplantation for Cardio-thoracic Surgery. 2017. 51:#pages#

Transplantation. 2017. 14:#pages#

Long-term Pseudomonas aeruginosa infection.. Mucosal immunology. 2018. 11:#pages#

New York Academy of Sciences. 2017. 1397:#pages#

Cystic Fibrosis Society. 2017. 16:#pages#

Transplantation proceedings. 2017. 49:#pages#

Transplantation proceedings. 2017. 49:#pages#

2017. 49:#pages#

Respiratory medicine. 2017. 17:#pages#

2017. 17:#pages#

CO observational study.. European journal of internal medicine. 2017. 43:#pages#

Transplantation: A single-center 15-year experience.. Transplant infectious disease : an official journal of the International Society for Heart Transplantation. 2017. 36:#pages#

and meropenem.. PloS one. 2017. 12:#pages#

2017. 12:#pages#

Transplantation.. Journal of cystic fibrosis : official journal of the European Cystic Fibrosis Society. 2017. 16:#pages#

Transplantation in Patients With Cystic Fibrosis.. The Annals of thoracic surgery. 2017. 104:#pages#

2017. 104:#pages#

Transplantation after pediatric lung transplantation.. Clinical transplantation. 2017. 31:#pages#

Transplantation. 2017. 31:#pages#

Journal of cystic fibrosis : official journal of the European Cystic Fibrosis Society. 2017. 16:#pages#

transplant infectious disease : an official journal of the Transplantation Society. 2017. 19:#pages#  
63:#pages#

retrospective study.. Transplant international : official journal of the European Society for Organ Transplantation. 2018

lung phenotype regulating rhoa activity, actin cytoskeleton dynamics and epithelial-mesenchymal transition  
in health : the journal of the International Society for Pharmacoeconomics and Outcomes Research. 2017

(IPF) and their caregivers: protocol and key design considerations.. BMJ open respiratory research. 2018. 5  
Mycobacterial and Aspergillus infections among cadaveric lung transplant recipients in Japan.. Respiratory in

ta peptide, alpha-fetoprotein and carcinoembryonic antigen.. Biomedicine & pharmacotherapy = Biomed

pages#

Transplantation. . 13:#pages#  
iana State Medical Society. 1995. 147:#pages#

onal Society for Heart Transplantation. . 12:#pages#  
n. . 12:#pages#

ansplantation. . 14:#pages#

res#

8:#pages#

: fur Kinderchirurgie. 1998. 8:#pages#

98. 17:#pages#

iges#



ysis and Transplant Association - European Renal Association. 2001. 16:#pages#  
for Cardio-thoracic Surgery. 2001. 19:#pages#

antation. 2001. 20:#pages#

cine. 2001. 164:#pages#

l:#pages#

s#

pediatric pulmonology. 2003. 35:#pages#

3. 22:#pages#

on of the European Society of Clinical Microbiology. 2003. 22:#pages#

plantation. 2003. 22:#pages#

or Heart Transplantation. 2004. 23:#pages#

rsplantation and the American Society of Transplant Surgeons. 2004. 4:#pages#

in : official journal of the American Society of Transplantation and the American Society of Transplant Surge

24:#pages#

#pages#  
ntation. 2005. 24:#pages#

he International Society for Heart Transplantation. 2005. 24:#pages#

Heart Transplantation. 2005. 24:#pages#

Heart Transplantation. 2005. 24:#pages#  
plantation. 2005. 24:#pages#

2006. 6:#pages#

the Pulmonary Scientific Council of the International Society for Heart and Lung Transplantation.. The Jour

national Society for Heart Transplantation. 2006. 25:#pages#

. Chemistry (Weinheim an der Bergstrasse, Germany). 2007. 13:#pages#

Heart Transplantation. 2007. 26:#pages#

y. 2007. 31:#pages#  
plantation. 2007. 26:#pages#

3:#pages#

ation of the International Society for Heart Transplantation. 2007. 26:#pages#  
pages#

s#

f heart and lung transplantation : the official publication of the International Society for Heart Transplantat

5:#pages#

gy. 2007. 26:#pages#

ons. 2008. 8:#pages#

ety of Transplant Surgeons. 2008. 8:#pages#

. 85:#pages#

ric lung transplantation.. The Journal of heart and lung transplantation : the official publication of the Inter

oracic Surgery. 2008. 34:#pages#

:#pages#

r Heart Transplantation. 2009. 28:#pages#

splantation over time: a single center experience.. Transplantation proceedings. 2009. 41:#pages#  
ages#

t Surgeons. 2009. 9:#pages#

an official journal of the Transplantation Society. 2009. 11:#pages#

183:#pages#

Journal of respiratory and critical care medicine. 2009. 180:#pages#

Association for Cardio-thoracic Surgery. 2009. 36:#pages#  
Surgeons. 2009. 9:#pages#  
Pages#

Journal of the International Society for Heart Transplantation. 2009. 28:#pages#

National Research Institute of Tuberculosis and Lung Diseases.. Transplantation proceedings. 2009. 41:#pages#

Pages#

Pages#

. 42:#pages#

Transplantation. 2010. 29:#pages#

Transplantation. 2010. 29:#pages#

on : the official publication of the International Society for Heart Transplantation. 2010. 29:#pages#

plantation : the official publication of the International Society for Heart Transplantation. 2010. 29:#pages

. 141:#pages#

s#

n : the official publication of the International Society for Heart Transplantation. 2011. 30:#pages#



lantation. 2012. 25:#pages#  
of the International Society for Heart Transplantation. 2012. 31:#pages#  
lication of the European Society of Clinical Microbiology. 2012. 31:#pages#

journal of transplantation : official journal of the American Society of Transplantation and the American So  
l care medicine. 2012. 185:#pages#

. 12:#pages#  
s. 2012. 51:#pages#  
ardio-thoracic Surgery. 2012. 41:#pages#  
eart Transplantation. 2012. 31:#pages#

merican Society of Transplant Surgeons. 2012. 12:#pages#  
antation.. The Journal of heart and lung transplantation : the official publication of the International Societ

755:#pages#

: the official publication of the International Society for Heart Transplantation. 2012. 31:#pages#

lar genetics. 2013. 22:#pages#

thoracic Surgery. 2013. 43:#pages#

Heart Transplantation. 2013. 32:#pages#

plantation. 2013. 32:#pages#

plantation?. The Journal of clinical endocrinology and metabolism. 2013. 98:#pages#

Heart and lung transplantation : the official publication of the International Society for Heart Transplantation

Association for the Study of Liver Diseases and the International Liver Transplantation Society. 2014. 20:#pages#

Pharmaceutical sciences : official journal of the European Federation for Pharmaceutical Sciences. 2014. 52:#

. 13:#pages#

ni, W Klepetko, A Toker. European guidelines on structure and qualification of general thoracic surgery.. Eu

14. 94:#pages#

#pages#

Journal of cardio-thoracic surgery : official journal of the European Association for Cardio-thoracic Surgery. 20

is associated with outcomes after the Norwood procedure.. The Journal of thoracic and cardiovascular surj

rosis patients.. Journal of cystic fibrosis : official journal of the European Cystic Fibrosis Society. 2015. 14:  
onal Society for Heart and Lung Transplantation.. The Journal of heart and lung transplantation : the officia

n the United States.. American journal of respiratory and critical care medicine. 2014. 190:#pages#  
untries.. Thorax. 2014. 69:#pages#

iges#

European Society of Clinical Microbiology and Infectious Diseases. 2014. 20:#pages#

: Surgeons. 2015. 15 Suppl 2:#pages#

us Diseases. 2015. 21:#pages#

f the Imaging Working Group of the AEPC and the Cardiovascular Magnetic Resonance Section of the EACVI.

merican Society of Transplant Surgeons. 2015. 15:#pages#

i. 2015. 34:#pages#

inction after Lung Transplantation.. American journal of transplantation : official journal of the American S  
16. 49:#pages#

ner post-transplant mortality.. Transplant international : official journal of the European Society for Organ T  
of the International Society for Heart Transplantation. 2015. 34:#pages#

al of the American Society of Transplantation and the American Society of Transplant Surgeons. 2015. 15:#

Heart Transplantation. 2015. 34:#pages#

cal Isolate of Burkholderia cenocepacia.. The Journal of biological chemistry. 2015. 290:#pages#

gia. . 41:#pages#

rgcons. 2016. 16:#pages#

5. 15:#pages#

care of adults with cystic fibrosis.. The European respiratory journal. 2016. 47:#pages#

dio-thoracic Surgery. 2016. 49:#pages#

Journal of the European Cystic Fibrosis Society. 2016. 15:#pages#

gia. . 41:#pages#

anese, D Albani, ML Albert, J Aldudo, H Algül, M Alirezaei, I Alloza, A Almasan, M Almonte-Beceril, ES Alnem

s of the multicentre, parallel-group, open-label, randomised controlled STEP-UP trial.. The Lancet. Respirat  
y of institutions in the Midwestern Respiratory Virus Collaborative.. Transplant infectious disease : an offici

ry. . 40:#pages#

ublication of the International Society for Heart Transplantation. 2016. 35:#pages#

pages#

journal of the European Society for Organ Transplantation. 2016. 29:#pages#

es#

16. 30:#pages#

pages#

ternational Society for Heart Transplantation. 2016. 35:#pages#

2016. 35:#pages#

17:#pages#

:he Society of Critical Care Medicine and the World Federation of Pediatric Intensive and Critical Care Socie

pean cohorts.. Thorax. 2016. 71:#pages#

tion. 2017. 36:#pages#

t study.. The Lancet. Respiratory medicine. 2016. 4:#pages#

.Diseases. 2017. 57:#pages#

an Transplantation. 2017. 15:#pages#

:Transplantation Society. 2017. 19:#pages#

:#pages#

3. 31:#pages#

Journal of cystic fibrosis : official journal of the European Cystic Fibrosis Society. 2018. 17:#pages#  
7. 20:#pages#

:#pages#  
investigation. 2018. 56:#pages#



icine & pharmacotherapie. 1992. 46:#pages#











ons. 2004. 4:#pages#

nal of heart and lung transplantation : the official publication of the International Society for Heart Transpl



ion. 2007. 26:#pages#

International Society for Heart Transplantation. 2008. 27:#pages#



讲

ciety of Transplant Surgeons. 2012. 12:#pages#

y for Heart Transplantation. 2012. 31:#pages#



‡

pages#

European journal of cardio-thoracic surgery : official journal of the European Association for Cardio-thoracic

2014. 46:#pages#

European journal of cardio-thoracic surgery. 2014. 46:#pages#

#pages#

l publication of the International Society for Heart Transplantation. 2015. 34:#pages#

. Cardiology in the young. 2015. 25:#pages#

ociety of Transplantation and the American Society of Transplant Surgeons. 2015. 15:#pages#

ransplantation. 2015. 28:#pages#

pages#



ri, C Alonso, N Altan-Bonnet, DC Altieri, S Alvarez, L Alvarez-Erviti, S Alves, G Amadoro, A Amano, C Amantini

ory medicine. 2016. 4:#pages#

al journal of the Transplantation Society. 2016. 18:#pages#

ties. 2016. 17:#pages#





















antation. 2006. 25:#pages#















Surgery. 2014. 45:#pages#



, S Ambrosio, I Amelio, AO Amer, M Amessou, A Amon, Z An, FA Anania, SU Andersen, UP Andley, CK Andrea

























































































Aquilano, K Araki, E Arama, A Aranda, J Araya, A Arcaro, E Arias, H Arimoto, AR Ariosa, JL Armstrong, T Arnoul













































d, I Arsov, K Asanuma, V Askanas, E Asselin, R Atarashi, SS Atherton, JD Atkin, LD Attardi, P Auberger, G Aubu











































urger, L Aurelian, R Autelli, L Avagliano, ML Avantageggiati, L Avrahami, S
